# Supplementary material
Source: PubMed Central journal article supplement (PMC5621985)

## SUPPLEMENTARY NOTE: SYNTHESIS AND CHARACTERIZATION OF NEW COMPOUNDS

### GENERAL EXPERIMENTAL INFORMATION FOR SYNTHESIS

General experimental information. Commercial reagents were obtained from reputable suppliers and used as received. All solvents were purchased in septum-sealed bottles stored under an inert atmosphere. All reactions were sealed with septa through which a nitrogen atmosphere was introduced unless otherwise noted. Reactions were conducted in round-bottomed flasks or septum-capped crimp-top vials containing Teflon-coated magnetic stir bars. Heating of reactions was accomplished with a silicon oil bath or an aluminum reaction block on top of a stirring hotplate equipped with an electronic contact thermometer to maintain the indicated temperatures.

Reactions were monitored by thin layer chromatography (TLC) on precoated TLC glass plates (silica gel 60 F<sub>254</sub>, 250  $\mu$ m thickness) or by LC-MS (Phenomenex Kinetex 2.1 mm  $\times$  30 mm 2.6  $\mu$ m C18 column; 5  $\mu$ L injection; 5–98% MeCN/H<sub>2</sub>O, linear gradient, with constant 0.1% v/v HCO<sub>2</sub>H additive; 6 min run; 0.5 mL/min flow; ESI; positive ion mode). TLC chromatograms were visualized by UV illumination or developed with *p*-anisaldehyde, ceric ammonium molybdate, or KMnO<sub>4</sub> stain. Reaction products were purified by flash chromatography on an automated purification system using pre-packed silica gel columns or by preparative HPLC (Phenomenex Gemini-NX 30  $\times$  150 mm 5  $\mu$ m C18 column). Analytical HPLC analysis was performed with an Agilent Eclipse XDB 4.6  $\times$  150 mm 5  $\mu$ m C18 column under the indicated conditions. High-resolution mass spectrometry was obtained by the Mass Spectrometry Center in the Department of Medicinal Chemistry at the University of Washington and the High Resolution Mass Spectrometry Facility at the University of Iowa.

NMR spectra were recorded on a 400 MHz spectrometer. <sup>1</sup>H and <sup>13</sup>C chemical shifts ( $\delta$ ) were referenced to TMS or residual solvent peaks, and <sup>19</sup>F chemical shifts ( $\delta$ ) were referenced to CFCl<sub>3</sub>. Data for <sup>1</sup>H NMR spectra are reported as follows: chemical shift ( $\delta$  ppm), multiplicity (s = singlet, d = doublet, t = triplet, q = quartet, dd = doublet of doublets, m = multiplet), coupling constant (Hz), integration. Data for <sup>13</sup>C NMR spectra are reported by chemical shift ( $\delta$  ppm) with hydrogen multiplicity (C, CH, CH<sub>2</sub>, CH<sub>3</sub>) information obtained from DEPT spectra.

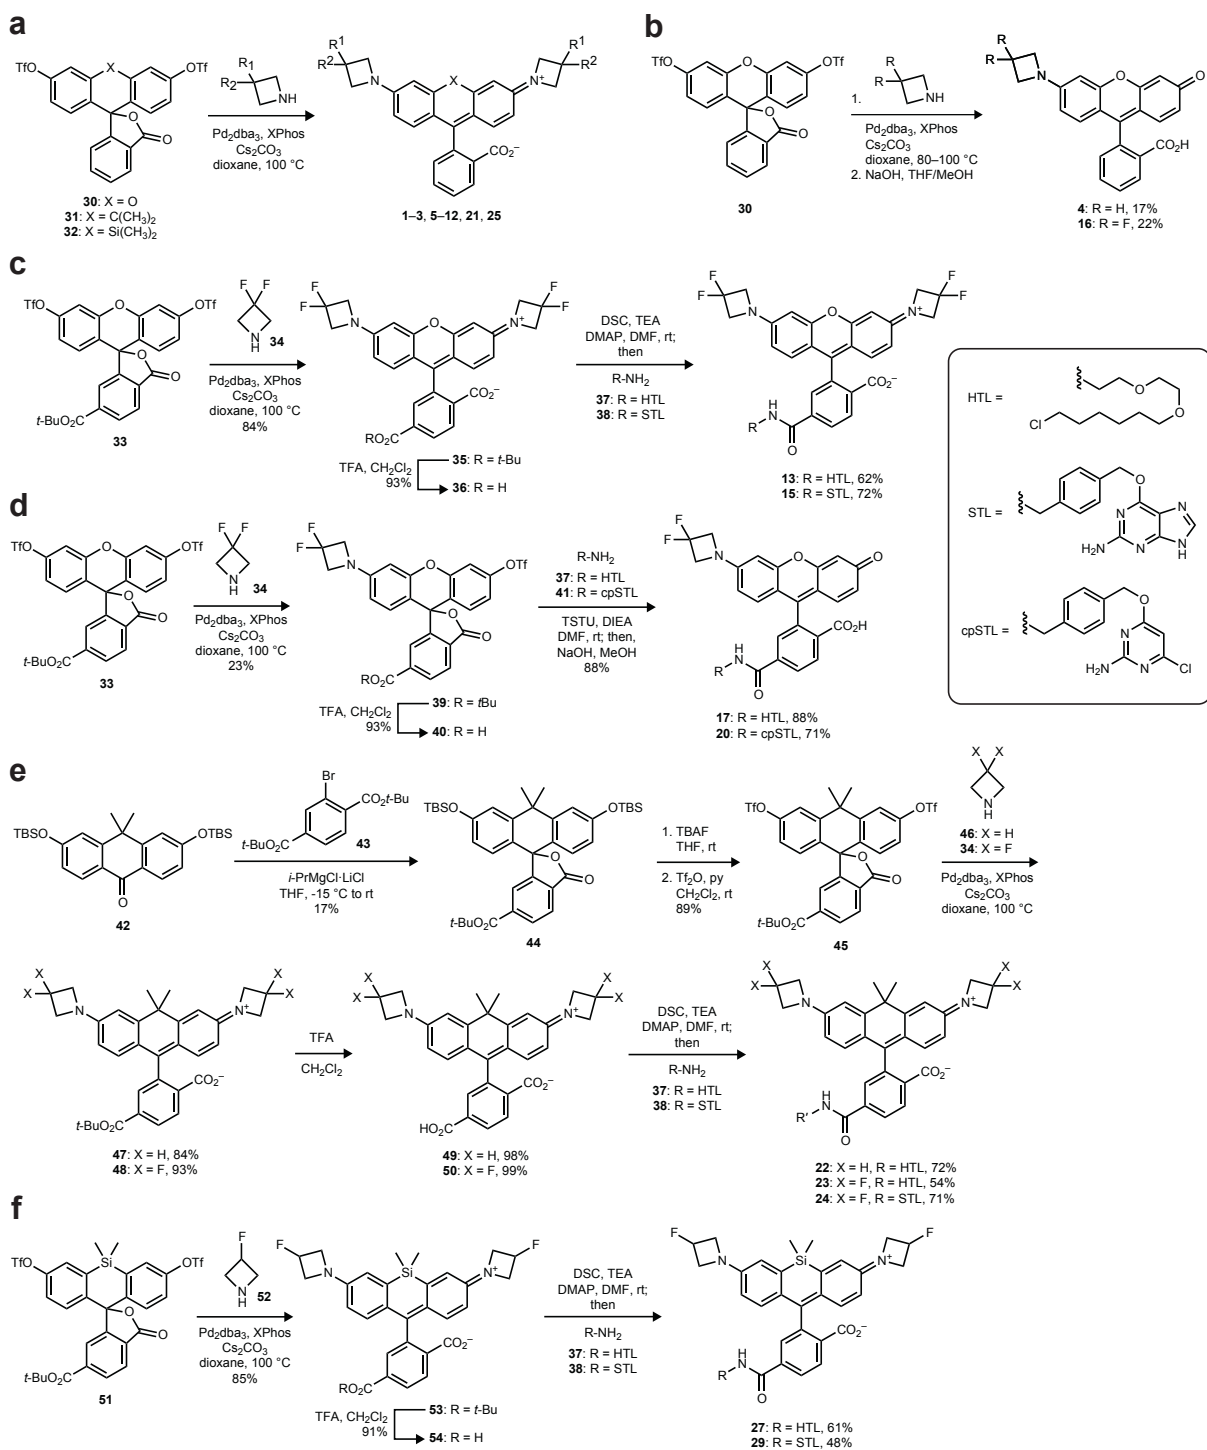

**Scheme SN1. Synthesis of Janelia Fluor dyes and ligands. (a)** Cross-coupling strategy for the synthesis of azetidinyl rhodamines. **(b)** Synthesis of azetidinyl rhodols **4** and **16**. **(c)** Synthesis of JF<sub>525</sub> ligands **13** and **15** from triflate **33**. **(d)** Synthesis of JF<sub>503</sub> ligands **17** and **20** from triflate **33**. **(e)** Synthesis of JF<sub>608</sub> and JF<sub>585</sub> ligands **22–24** from ketone **42**. **(f)** Synthesis of JF<sub>635</sub> ligands **27** and **29** from triflate **51**.

## SYNTHESIS OF DITRIFLATE 45

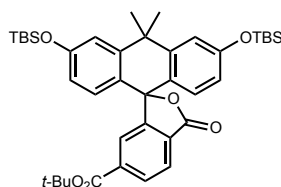

**6-*tert*-Butoxycarbonylcarbofluorescein bis-(*tert*-butyldimethylsilyl ether) (44):** A vial was charged with di-*tert*-butyl 2-bromoterephthalate (**43**; 1.48 g, 4.14 mmol, 2 eq), sealed, and flushed with nitrogen. After dissolving the bromide in THF (7 mL) and cooling the reaction to  $-15\text{ }^{\circ}\text{C}$ , *i*-PrMgCl·LiCl (1.3 M in THF, 3.19 mL, 4.14 mmol, 2 eq) was added. The reaction was warmed to  $-10\text{ }^{\circ}\text{C}$  and stirred for 4 h. A solution of 3,6-bis((*tert*-butyldimethylsilyloxy)-10,10-dimethylanthracen-9(10*H*)-one<sup>1</sup> (**42**; 1.00 g, 2.07 mmol) in THF (4 mL) was then added dropwise. The reaction mixture was warmed to room temperature and stirred for 2 h. It was subsequently quenched with saturated NH<sub>4</sub>Cl, diluted with water, and extracted with EtOAc (2×). The combined organics were washed with brine, dried (MgSO<sub>4</sub>), filtered, and evaporated. Silica gel chromatography (0–10% Et<sub>2</sub>O/hexanes, linear gradient) provided 245 mg (17%) of **44** as a colorless solid. <sup>1</sup>H NMR (CDCl<sub>3</sub>, 400 MHz)  $\delta$  8.16 (dd, *J* = 8.0, 1.3 Hz, 1H), 8.02 (dd, *J* = 8.0, 0.6 Hz, 1H), 7.63 – 7.59 (m, 1H), 7.09 – 7.05 (m, 2H), 6.64 – 6.57 (m, 4H), 1.81 (s, 3H), 1.72 (s, 3H), 1.54 (s, 9H), 0.99 (s, 18H), 0.22 (s, 12H); <sup>13</sup>C NMR (CDCl<sub>3</sub>, 101 MHz)  $\delta$  169.9 (C), 164.4 (C), 156.5 (C), 155.5 (C), 147.0 (C), 138.1 (C), 130.3 (CH), 129.7 (C), 129.3 (CH), 125.1 (CH), 125.0 (CH), 124.0 (C), 119.2 (CH), 117.8 (CH), 87.0 (C), 82.5 (C), 38.2 (C), 35.0 (CH<sub>3</sub>), 33.2 (CH<sub>3</sub>), 28.2 (CH<sub>3</sub>), 25.8 (CH<sub>3</sub>), 18.4 (C), -4.17 (CH<sub>3</sub>), -4.19 (CH<sub>3</sub>); HRMS (ESI) calcd for C<sub>40</sub>H<sub>55</sub>O<sub>6</sub>Si<sub>2</sub> [M+H]<sup>+</sup> 687.3537, found 687.3533.

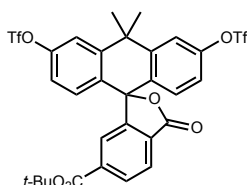

**6-*tert*-Butoxycarbonylcarbofluorescein ditriflate (45):** To a solution of silyl ether **44** (170 mg, 0.247 mmol) was added TBAF (1.0 M in THF, 990  $\mu\text{L}$ , 0.990 mmol, 4 eq). The reaction was stirred at room temperature for 10 min. It was subsequently diluted with saturated NH<sub>4</sub>Cl and extracted with EtOAc (2×). The organic extracts were washed with brine, dried (MgSO<sub>4</sub>), filtered, and evaporated to provide an orange residue. The crude intermediate was taken up in CH<sub>2</sub>Cl<sub>2</sub> (5 mL) and cooled to 0  $^{\circ}\text{C}$ . Pyridine (160  $\mu\text{L}$ , 1.98 mmol, 8 eq) and trifluoromethanesulfonic anhydride (167  $\mu\text{L}$ , 0.990  $\mu\text{mol}$ , 4 eq) were added, and the ice bath was removed. The reaction was stirred at room temperature for 2 h. It was then diluted with water and extracted with CH<sub>2</sub>Cl<sub>2</sub> (2×). The combined organics were washed with brine, dried (MgSO<sub>4</sub>), filtered, and concentrated *in vacuo*. Flash chromatography on silica gel (0–20% EtOAc/hexanes, linear gradient) afforded 159 mg (89%) of **45** as a colorless solid. <sup>1</sup>H NMR (CDCl<sub>3</sub>, 400 MHz)  $\delta$  8.24 (dd, *J* = 8.0, 1.3 Hz, 1H), 8.11 (dd, *J* = 8.0, 0.6 Hz, 1H), 7.63 – 7.60 (m, 1H), 7.56 (d, *J* = 2.5 Hz, 2H), 7.10 (dd, *J* = 8.8, 2.5 Hz, 2H), 6.88 (d, *J* = 8.8 Hz, 2H), 1.91 (s, 3H), 1.81 (s, 3H), 1.56 (s, 9H); <sup>19</sup>F NMR (CDCl<sub>3</sub>, 376 MHz)  $\delta$

-73.20 (s);  $^{13}\text{C}$  NMR ( $\text{CDCl}_3$ , 101 MHz)  $\delta$  168.8 (C), 163.9 (C), 153.9 (C), 150.4 (C), 147.2 (C), 138.9 (C), 131.4 (CH), 131.1 (C), 130.3 (CH), 128.8 (C), 125.9 (CH), 124.7 (CH), 120.6 (CH), 119.8 (CH), 118.9 (q,  $^1J_{\text{CF}} = 320.9$  Hz,  $\text{CF}_3$ ), 84.3 (C), 83.1 (C), 39.0 (C), 34.8 ( $\text{CH}_3$ ), 33.2 ( $\text{CH}_3$ ), 28.2 ( $\text{CH}_3$ ); HRMS (ESI) calcd for  $\text{C}_{30}\text{H}_{25}\text{F}_6\text{O}_{10}\text{S}_2$   $[\text{M}+\text{H}]^+$  723.0793, found 723.0797.

## C–N CROSS-COUPLING PRODUCTS

### General procedure for preparation of rhodamines via C–N cross-coupling of fluorescein ditriflates (Method A):

The following procedure for **5** is representative. A vial was charged with fluorescein ditriflate (**30**; 150 mg, 251  $\mu\text{mol}$ ), 3,3-dimethylazetidinium hydrochloride (73 mg, 604  $\mu\text{mol}$ , 2.4 eq),  $\text{Pd}_2\text{dba}_3$  (23 mg, 25.1  $\mu\text{mol}$ , 0.1 eq), XPhos (36 mg, 75.4  $\mu\text{mol}$ , 0.3 eq), and  $\text{Cs}_2\text{CO}_3$  (393 mg, 1.21 mmol, 4.8 eq). The vial was sealed and evacuated/backfilled with nitrogen (3 $\times$ ). Dioxane (2 mL) was added, and the reaction was flushed again with nitrogen (3 $\times$ ). The reaction was then stirred at 100  $^\circ\text{C}$  for 4 h. It was subsequently cooled to room temperature, diluted with MeOH, deposited onto Celite, and concentrated to dryness. Purification by silica gel chromatography (0–10% MeOH (2 M  $\text{NH}_3$ )/ $\text{CH}_2\text{Cl}_2$ , linear gradient; dry load with Celite) afforded **5** (101 mg, 86%) as a purple solid.

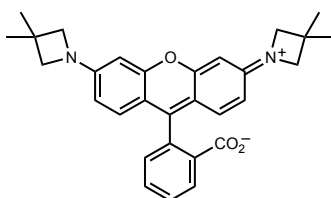

**2-(3,6-Bis(3,3-dimethylazetidinium-1-yl)xanthylium-9-yl)benzoate (5):** (86%, purple solid)  $^1\text{H}$  NMR ( $\text{CD}_3\text{OD}$ , 400 MHz)  $\delta$  8.11 – 8.06 (m, 1H), 7.67 – 7.57 (m, 2H), 7.23 – 7.20 (m, 1H), 7.19 (d,  $J = 9.2$  Hz, 2H), 6.56 (dd,  $J = 9.1$ , 2.2 Hz, 2H), 6.49 (d,  $J = 2.2$  Hz, 2H), 3.92 (s, 8H), 1.39 (s, 12H);  $^{13}\text{C}$  NMR ( $\text{CD}_3\text{OD}$ , 101 MHz)  $\delta$  173.1 (C), 160.2 (C), 158.7 (C), 158.2 (C), 140.8 (C), 134.9 (C), 132.9 (CH), 130.82 (CH), 130.77 (CH), 130.74 (CH), 130.2 (CH), 115.0 (C), 113.1 (CH), 95.5 (CH), 64.4 ( $\text{CH}_2$ ), 33.0 (C), 27.1 ( $\text{CH}_3$ ); Analytical HPLC:  $t_{\text{R}} = 15.6$  min, >99% purity (10–95% MeCN/ $\text{H}_2\text{O}$ , linear gradient, with constant 0.1% v/v TFA additive; 20 min run; 1 mL/min flow; ESI; positive ion mode; detection at 550 nm); HRMS (ESI) calcd for  $\text{C}_{30}\text{H}_{31}\text{N}_2\text{O}_3$   $[\text{M}+\text{H}]^+$  467.2329, found 467.2341.

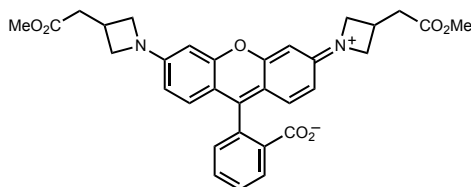

**2-(3,6-Bis(3-(2-methoxy-2-oxoethyl)azetidinium-1-yl)xanthylium-9-yl)benzoate (55):** Method A was used to prepare the title compound from **30** and methyl 3-azetidiniumacetate trifluoroacetate (67%, purple solid).  $^1\text{H}$  NMR ( $\text{CD}_3\text{OD}$ , 400 MHz)  $\delta$  8.10 – 8.05 (m, 1H), 7.67 – 7.57 (m, 2H), 7.21 – 7.18 (m, 1H), 7.16 (d,  $J = 9.1$  Hz, 2H), 6.54 (dd,  $J = 9.1$ , 2.2 Hz, 2H), 6.48 (d,  $J = 2.2$  Hz, 2H), 4.41 – 4.32 (m, 4H), 3.97 – 3.88 (m, 4H), 3.69 (s, 6H), 3.26 – 3.13 (m,

2H), 2.80 (d,  $J = 7.7$  Hz, 4H);  $^{13}\text{C}$  NMR ( $\text{CD}_3\text{OD}$ , 101 MHz)  $\delta$  173.7 (C), 173.0 (C), 158.3 (C), 157.5 (C), 154.9 (C), 140.1 (C), 136.3 (C), 132.7 (CH), 131.1 (CH), 130.8 (CH), 130.4 (CH), 129.8 (CH), 114.5 (C), 112.7 (CH), 95.7 (CH), 57.5 ( $\text{CH}_2$ ), 52.2 ( $\text{CH}_3$ ), 38.5 ( $\text{CH}_2$ ), 27.3 (CH); HRMS (ESI) calcd for  $\text{C}_{32}\text{H}_{31}\text{N}_2\text{O}_7$   $[\text{M}+\text{H}]^+$  555.2126, found 555.2132.

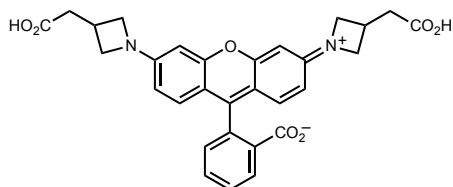

**2-(3,6-Bis(3-(carboxymethyl)azetidini-1-yl)xanthylum-9-yl)benzoate (6):** Ester **55** (25 mg, 45.1  $\mu\text{mol}$ ) was dissolved in MeOH (2 mL), and 1 M NaOH (180  $\mu\text{L}$ , 180  $\mu\text{mol}$ , 4 eq) was added. After stirring the reaction at room temperature for 18 h, it was acidified with 1 M HCl (200  $\mu\text{L}$ ) and directly purified by reverse phase HPLC (10–50% MeCN/ $\text{H}_2\text{O}$ , linear gradient, with constant 0.1% v/v TFA additive) to provide 23 mg (80%, TFA salt) of **6** as a red-purple solid.  $^1\text{H}$  NMR ( $\text{CD}_3\text{OD}$ , 400 MHz)  $\delta$  8.35 – 8.30 (m, 1H), 7.83 (td,  $J = 7.5$ , 1.5 Hz, 1H), 7.78 (td,  $J = 7.6$ , 1.5 Hz, 1H), 7.40 – 7.35 (m, 1H), 7.07 (d,  $J = 9.2$  Hz, 2H), 6.62 (dd,  $J = 9.2$ , 2.2 Hz, 2H), 6.56 (d,  $J = 2.2$  Hz, 2H), 4.43 (t,  $J = 9.6$  Hz, 4H), 4.05 – 3.96 (m, 4H), 3.28 – 3.16 (m, 2H), 2.78 (d,  $J = 7.7$  Hz, 4H);  $^{13}\text{C}$  NMR ( $\text{CD}_3\text{OD}$ , 101 MHz)  $\delta$  175.1 (C), 167.9 (C), 161.7 (C), 158.8 (C), 158.0 (C), 135.4 (C), 133.8 (CH), 132.5 (CH), 132.3 (CH), 131.41 (CH), 131.40 (CH), 115.1 (C), 113.7 (CH), 95.3 (CH), 57.6 ( $\text{CH}_2$ ), 38.5 ( $\text{CH}_2$ ), 27.3 (CH); Analytical HPLC:  $t_{\text{R}} = 10.5$  min, >99% purity (10–95% MeCN/ $\text{H}_2\text{O}$ , linear gradient, with constant 0.1% v/v TFA additive; 20 min run; 1 mL/min flow; ESI; positive ion mode; detection at 550 nm); HRMS (ESI) calcd for  $\text{C}_{30}\text{H}_{27}\text{N}_2\text{O}_7$   $[\text{M}+\text{H}]^+$  527.1813, found 527.1815.

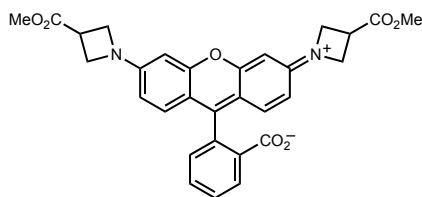

**2-(3,6-Bis(3-(methoxycarbonyl)azetidini-1-yl)xanthylum-9-yl)benzoate (56):** Method A was used to prepare the title compound from **30** and methyl azetidine-3-carboxylate hydrochloride (79%, purple solid).  $^1\text{H}$  NMR ( $\text{CD}_3\text{OD}$ , 400 MHz)  $\delta$  8.09 – 8.03 (m, 1H), 7.69 – 7.62 (m, 2H), 7.24 – 7.17 (m, 1H), 7.02 (d,  $J = 8.9$  Hz, 2H), 6.48 (dd,  $J = 8.9$ , 2.2 Hz, 2H), 6.45 (d,  $J = 2.1$  Hz, 2H), 4.34 (t,  $J = 9.0$  Hz, 4H), 4.25 (dd,  $J = 9.0$ , 5.9 Hz, 4H), 3.77 (s, 6H), 3.71 (tt,  $J = 8.9$ , 5.9 Hz, 2H);  $^{13}\text{C}$  NMR ( $\text{CD}_3\text{OD}$ , 101 MHz)  $\delta$  174.4 (C), 172.6 (C), 157.0 (C), 156.5 (C), 141.6 (C), 136.7 (C), 135.8 (C), 132.7 (CH), 131.9 (CH), 130.9 (CH), 129.0 (CH), 128.5 (CH), 113.3 (C), 111.7 (CH), 96.8 (CH), 55.2 ( $\text{CH}_2$ ), 52.9 ( $\text{CH}_3$ ), 34.0 (CH); HRMS (ESI) calcd for  $\text{C}_{30}\text{H}_{27}\text{N}_2\text{O}_7$   $[\text{M}+\text{H}]^+$  527.1813, found 527.1823.

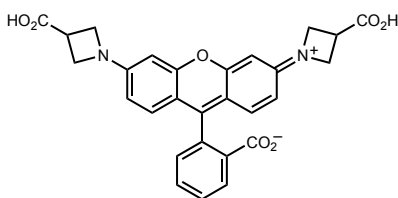

**2-(3,6-Bis(3-carboxyazetidinium-1-yl)xanthylium-9-yl)benzoate (7):** Ester **56** (40 mg, 76.0  $\mu\text{mol}$ ) was dissolved in MeOH (2.5 mL), and 1 M NaOH (304  $\mu\text{L}$ , 304  $\mu\text{mol}$ , 4 eq) was added. After stirring the reaction at room temperature for 18 h, it was acidified with 1 M HCl (350  $\mu\text{L}$ ) and directly purified by reverse phase HPLC (10–50% MeCN/H<sub>2</sub>O, linear gradient, with constant 0.1% v/v TFA additive) to provide 28 mg (60%, TFA salt) of **7** as a red-purple solid. <sup>1</sup>H NMR (CD<sub>3</sub>OD, 400 MHz)  $\delta$  8.36 – 8.30 (m, 1H), 7.84 (td,  $J = 7.5, 1.6$  Hz, 1H), 7.79 (td,  $J = 7.6, 1.5$  Hz, 1H), 7.40 – 7.36 (m, 1H), 7.12 (d,  $J = 9.2$  Hz, 2H), 6.66 (dd,  $J = 9.2, 2.2$  Hz, 2H), 6.61 (d,  $J = 2.2$  Hz, 2H), 4.48 (t,  $J = 9.6$  Hz, 4H), 4.39 (dd,  $J = 9.9, 5.9$  Hz, 4H), 3.72 (tt,  $J = 9.0, 5.8$  Hz, 2H); <sup>13</sup>C NMR (CD<sub>3</sub>OD, 101 MHz)  $\delta$  175.2 (C), 168.0 (C), 162.4 (C), 158.9 (C), 157.9 (C), 135.3 (C), 133.9 (CH), 132.6 (CH), 132.5 (CH), 131.5 (CH), 131.4 (CH), 115.4 (C), 113.8 (CH), 95.6 (CH), 55.3 (CH<sub>2</sub>), 33.9 (CH); Analytical HPLC:  $t_{\text{R}} = 11.2$  min, >99% purity (10–75% MeCN/H<sub>2</sub>O, linear gradient, with constant 0.1% v/v TFA additive; 20 min run; 1 mL/min flow; ESI; positive ion mode; detection at 550 nm); HRMS (ESI) calcd for C<sub>28</sub>H<sub>23</sub>N<sub>2</sub>O<sub>7</sub> [M+H]<sup>+</sup> 499.1500, found 499.1507.

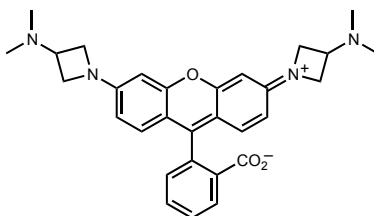

**2-(3,6-Bis(3-(dimethylamino)azetidinium-1-yl)xanthylium-9-yl)benzoate (8):** Method A was used to prepare the title compound from **30** and 3-(dimethylamino)azetidinium dihydrochloride (80%, purple solid). <sup>1</sup>H NMR (CD<sub>3</sub>OD, 400 MHz)  $\delta$  8.10 – 8.05 (m, 1H), 7.69 – 7.60 (m, 2H), 7.24 – 7.19 (m, 1H), 7.12 (d,  $J = 9.0$  Hz, 2H), 6.56 (dd,  $J = 9.0, 2.2$  Hz, 2H), 6.53 (d,  $J = 2.2$  Hz, 2H), 4.31 – 4.22 (m, 4H), 4.01 (dd,  $J = 10.5, 5.1$  Hz, 4H), 3.39 (tt,  $J = 7.0, 5.1$  Hz, 2H), 2.27 (s, 12H); <sup>13</sup>C NMR (CD<sub>3</sub>OD, 101 MHz)  $\delta$  172.8 (C), 157.9 (C), 157.1 (C), 147.7 (C), 138.7 (C), 138.4 (C), 132.5 (CH), 131.8 (CH), 130.8 (CH), 129.9 (CH), 129.3 (CH), 114.1 (C), 112.4 (CH), 96.3 (CH), 57.0 (CH), 56.6 (CH<sub>2</sub>), 42.0 (CH<sub>3</sub>); Analytical HPLC:  $t_{\text{R}} = 7.1$  min, >99% purity (10–95% MeCN/H<sub>2</sub>O, linear gradient, with constant 0.1% v/v TFA additive; 20 min run; 1 mL/min flow; ESI; positive ion mode; detection at 550 nm); HRMS (ESI) calcd for C<sub>30</sub>H<sub>33</sub>N<sub>4</sub>O<sub>3</sub> [M+H]<sup>+</sup> 497.2547, found 497.2561.

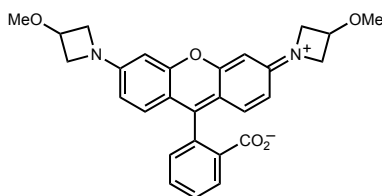

**2-(3,6-Bis(3-methoxyazetid-1-yl)xanthylium-9-yl)benzoate (9):** Method A was used to prepare the title compound from **30** and 3-methoxyazetid-1-yl hydrochloride (83%, purple solid).  $^1\text{H}$  NMR (DMSO- $d_6$ , 400 MHz)  $\delta$  8.00 – 7.94 (m, 1H), 7.77 (td,  $J = 7.5, 1.2$  Hz, 1H), 7.70 (td,  $J = 7.5, 0.9$  Hz, 1H), 7.25 – 7.20 (m, 1H), 6.48 (d,  $J = 8.6$  Hz, 2H), 6.26 (d,  $J = 2.3$  Hz, 2H), 6.19 (dd,  $J = 8.6, 2.3$  Hz, 2H), 4.32 (tt,  $J = 6.2, 4.2$  Hz, 2H), 4.07 (dd,  $J = 8.0, 6.6$  Hz, 4H), 3.66 (dd,  $J = 8.4, 4.1$  Hz, 4H), 3.24 (s, 6H);  $^{13}\text{C}$  NMR (DMSO- $d_6$ , 101 MHz)  $\delta$  168.7 (C), 152.8 (C), 152.5 (C), 151.9 (C), 135.4 (CH), 129.9 (CH), 128.5 (CH), 126.5 (C), 124.5 (CH), 123.9 (CH), 108.2 (CH), 107.2 (C), 97.5 (CH), 84.1 (C), 69.2 (CH), 58.3 (CH<sub>2</sub>), 55.4 (CH<sub>3</sub>); Analytical HPLC:  $t_{\text{R}} = 12.2$  min, >99% purity (10–95% MeCN/H<sub>2</sub>O, linear gradient, with constant 0.1% v/v TFA additive; 20 min run; 1 mL/min flow; ESI; positive ion mode; detection at 550 nm); HRMS (ESI) calcd for C<sub>28</sub>H<sub>27</sub>N<sub>2</sub>O<sub>5</sub> [M+H]<sup>+</sup> 471.1914, found 471.1926.

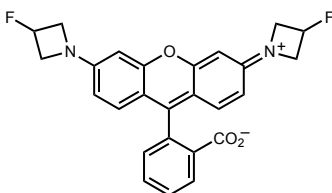

**2-(3,6-Bis(3-fluoroazetid-1-yl)xanthylium-9-yl)benzoate (10):** Method A was used to prepare the title compound from **30** and 3-fluoroazetid-1-yl hydrochloride (89%, pink solid).  $^1\text{H}$  NMR (DMSO- $d_6$ , 400 MHz)  $\delta$  8.01 – 7.95 (m, 1H), 7.78 (td,  $J = 7.5, 1.2$  Hz, 1H), 7.71 (td,  $J = 7.5, 0.9$  Hz, 1H), 7.25 – 7.20 (m, 1H), 6.52 (d,  $J = 8.6$  Hz, 2H), 6.33 (d,  $J = 2.3$  Hz, 2H), 6.24 (dd,  $J = 8.6, 2.3$  Hz, 2H), 5.49 (dtt,  $^2J_{\text{HF}} = 57.6$  Hz,  $J = 6.0, 3.1$  Hz, 2H), 4.26 – 4.13 (m, 4H), 4.00 – 3.88 (m, 4H);  $^{19}\text{F}$  NMR (DMSO- $d_6$ , 376 MHz)  $\delta$  -178.95 (dtt,  $J_{\text{FH}} = 57.4, 24.2, 20.9$  Hz);  $^{13}\text{C}$  NMR (DMSO- $d_6$ , 101 MHz)  $\delta$  168.7 (C), 152.54 (d,  $^4J_{\text{CF}} = 1.3$  Hz, C), 152.47 (C), 151.8 (C), 135.4 (CH), 129.9 (CH), 128.6 (CH), 126.4 (C), 124.5 (CH), 123.9 (CH), 108.6 (CH), 107.8 (C), 98.0 (CH), 83.8 (C), 83.3 (d,  $^1J_{\text{CF}} = 200.3$  Hz, CFH), 59.2 (d,  $^2J_{\text{CF}} = 23.7$  Hz, CH<sub>2</sub>); Analytical HPLC:  $t_{\text{R}} = 12.1$  min, >99% purity (10–95% MeCN/H<sub>2</sub>O, linear gradient, with constant 0.1% v/v TFA additive; 20 min run; 1 mL/min flow; ESI; positive ion mode; detection at 550 nm); HRMS (ESI) calcd for C<sub>26</sub>H<sub>21</sub>F<sub>2</sub>N<sub>2</sub>O<sub>3</sub> [M+H]<sup>+</sup> 447.1515, found 447.1525.

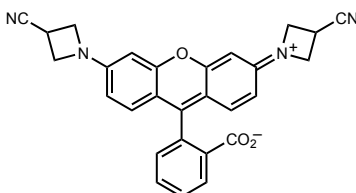

**2-(3,6-Bis(3-cyanoazetid-1-yl)xanthylium-9-yl)benzoate (11):** Method A was used to prepare the title compound from **30** and 3-azetid-1-yl carbonitrile hydrochloride (85%, magenta solid).  $^1\text{H}$  NMR (CDCl<sub>3</sub>, 400 MHz)  $\delta$  8.03 – 7.98 (m, 1H), 7.66 (td,  $J = 7.4, 1.3$  Hz, 1H), 7.60 (td,  $J = 7.4, 1.1$  Hz, 1H), 7.17 – 7.13 (m, 1H), 6.62 (d,  $J = 8.6$  Hz, 2H), 6.25 (d,  $J = 2.3$  Hz, 2H), 6.12 (dd,  $J = 8.6, 2.4$  Hz, 2H), 4.25 – 4.18 (m, 4H), 4.15 – 4.08 (m, 4H), 3.60 (tt,  $J = 8.5, 6.2$  Hz, 2H);  $^{13}\text{C}$  NMR (CDCl<sub>3</sub>, 101 MHz)  $\delta$  169.6 (C), 153.2 (C), 152.5 (C), 151.9 (C), 135.0 (CH), 129.7 (CH), 129.3 (CH), 127.1 (C), 125.1 (CH), 124.0 (CH), 119.7 (C), 109.7 (C), 108.1 (CH), 98.7 (CH), 83.9 (C), 55.2 (CH<sub>2</sub>), 18.4 (CH); Analytical HPLC:  $t_{\text{R}} = 11.0$  min, >99% purity (10–95% MeCN/H<sub>2</sub>O, linear gradient, with

constant 0.1% v/v TFA additive; 20 min run; 1 mL/min flow; ESI; positive ion mode; detection at 550 nm); HRMS (ESI) calcd for C<sub>28</sub>H<sub>21</sub>N<sub>4</sub>O<sub>3</sub> [M+H]<sup>+</sup> 461.1608, found 461.1628.

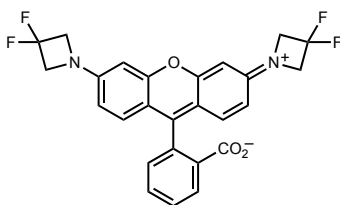

**JF<sub>525</sub> (12):** Method A was used to prepare the title compound from **30** and 3,3-difluoroazetidinium hydrochloride (91%, pink solid). <sup>1</sup>H NMR (CDCl<sub>3</sub>, 400 MHz) δ 8.03 – 7.99 (m, 1H), 7.66 (td, *J* = 7.4, 1.3 Hz, 1H), 7.60 (td, *J* = 7.4, 1.1 Hz, 1H), 7.17 – 7.14 (m, 1H), 6.64 (d, *J* = 8.6 Hz, 2H), 6.30 (d, *J* = 2.4 Hz, 2H), 6.17 (dd, *J* = 8.6, 2.4 Hz, 2H), 4.25 (t, <sup>3</sup>*J*<sub>HF</sub> = 11.7 Hz, 8H); <sup>19</sup>F NMR (CDCl<sub>3</sub>, 376 MHz) δ -100.05 (p, <sup>3</sup>*J*<sub>FH</sub> = 11.8 Hz); <sup>13</sup>C NMR (CDCl<sub>3</sub>, 101 MHz) δ 169.6 (C), 153.3 (C), 152.6 (C), 151.3 (t, <sup>4</sup>*J*<sub>CF</sub> = 2.9 Hz, C), 135.0 (CH), 129.7 (CH), 129.3 (CH), 127.2 (C), 125.1 (CH), 124.0 (CH), 115.8 (t, <sup>1</sup>*J*<sub>CF</sub> = 274.6 Hz, CF<sub>2</sub>), 109.7 (C), 108.8 (CH), 99.4 (CH), 83.9 (C), 63.4 (t, <sup>2</sup>*J*<sub>CF</sub> = 26.3 Hz, CH<sub>2</sub>); Analytical HPLC: *t*<sub>R</sub> = 12.7 min, >99% purity (10–95% MeCN/H<sub>2</sub>O, linear gradient, with constant 0.1% v/v TFA additive; 20 min run; 1 mL/min flow; ESI; positive ion mode; detection at 525 nm); HRMS (ESI) calcd for C<sub>26</sub>H<sub>19</sub>F<sub>4</sub>N<sub>2</sub>O<sub>3</sub> [M+H]<sup>+</sup> 483.1326, found 483.1336.

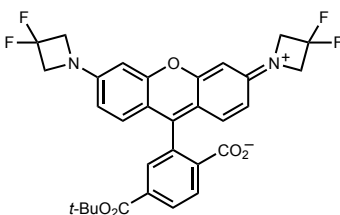

**6-*tert*-Butoxycarbonyl-JF<sub>525</sub> (35):** Method A was used to prepare the title compound from 6-*tert*-butoxycarbonylfluorescein ditriflate<sup>2</sup> (**33**) and 3,3-difluoroazetidinium hydrochloride (84%, pink solid). <sup>1</sup>H NMR (CDCl<sub>3</sub>, 400 MHz) δ 8.21 (dd, *J* = 8.0, 1.3 Hz, 1H), 8.04 (dd, *J* = 8.0, 0.8 Hz, 1H), 7.73 (dd, *J* = 1.2, 0.8 Hz, 1H), 6.61 (d, *J* = 8.6 Hz, 2H), 6.30 (d, *J* = 2.4 Hz, 2H), 6.17 (dd, *J* = 8.6, 2.4 Hz, 2H), 4.25 (t, <sup>3</sup>*J*<sub>HF</sub> = 11.7 Hz, 8H), 1.55 (s, 9H); <sup>19</sup>F NMR (CDCl<sub>3</sub>, 376 MHz) δ -100.06 (p, <sup>3</sup>*J*<sub>FH</sub> = 11.7 Hz); <sup>13</sup>C NMR (CDCl<sub>3</sub>, 101 MHz) δ 168.8 (C), 164.3 (C), 153.3 (C), 152.6 (C), 151.4 (t, <sup>4</sup>*J*<sub>CF</sub> = 2.9 Hz, C), 138.4 (C), 130.9 (CH), 130.2 (C), 129.3 (CH), 125.1 (CH), 125.0 (CH), 115.7 (t, <sup>1</sup>*J*<sub>CF</sub> = 274.5 Hz, CF<sub>2</sub>), 109.1 (C), 108.9 (CH), 99.4 (CH), 84.3 (C), 82.7 (C), 63.4 (t, <sup>2</sup>*J*<sub>CF</sub> = 26.3 Hz, CH<sub>2</sub>), 28.2 (CH<sub>3</sub>); HRMS (ESI) calcd for C<sub>31</sub>H<sub>27</sub>F<sub>4</sub>N<sub>2</sub>O<sub>5</sub> [M+H]<sup>+</sup> 583.1851, found 583.1859.

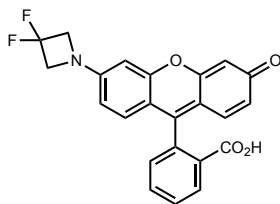



**JF<sub>503</sub> (16):** A vial was charged with fluorescein ditriflate (**30**; 100 mg, 168  $\mu$ mol), 3,3-difluoroazetidene hydrochloride (22 mg, 168  $\mu$ mol, 1 eq), Pd<sub>2</sub>dba<sub>3</sub> (7.7 mg, 8.4  $\mu$ mol, 0.05 eq), XPhos (12 mg, 25.1  $\mu$ mol, 0.15 eq), and Cs<sub>2</sub>CO<sub>3</sub> (131 mg, 402  $\mu$ mol, 2.4 eq). The vial was sealed and evacuated/backfilled with nitrogen (3 $\times$ ). Dioxane (1 mL) was added, and the reaction was flushed again with nitrogen (3 $\times$ ). The reaction was then stirred at 100 °C for 1 h. It was subsequently cooled to room temperature, filtered through Celite with CH<sub>2</sub>Cl<sub>2</sub>, and concentrated to dryness. Purification by silica gel chromatography (0–40% EtOAc/hexanes, linear gradient) afforded JF<sub>503</sub> triflate (23 mg, 25%) as a white foam.

The triflate (20 mg, 37.1  $\mu$ mol) was taken up in 1:1 THF/MeOH (1 mL). After adding 1 M NaOH (74  $\mu$ L, 74.2  $\mu$ mol, 2 eq), the reaction was stirred at room temperature for 3 h. It was then neutralized with 1 M HCl (74  $\mu$ L) and concentrated to dryness. Reverse phase HPLC (10–75% MeCN/H<sub>2</sub>O, linear gradient, with constant 0.1% v/v TFA additive) afforded 17 mg (88%, TFA salt) of **16** as an orange solid. <sup>1</sup>H NMR (CD<sub>3</sub>OD, 400 MHz)  $\delta$  8.16 (d,  $J$  = 7.5 Hz, 1H), 7.85 – 7.79 (m, 1H), 7.79 – 7.72 (m, 1H), 7.29 (d,  $J$  = 7.6 Hz, 1H), 6.99 – 6.83 (m, 3H), 6.75 (d,  $J$  = 8.6 Hz, 1H), 6.67 – 6.60 (m, 1H), 6.56 (d,  $J$  = 8.7 Hz, 1H), 4.49 (t, <sup>3</sup> $J_{\text{HF}}$  = 11.7 Hz, 4H); <sup>19</sup>F NMR (CD<sub>3</sub>OD, 376 MHz)  $\delta$  -75.42 (s, 3F), -100.27 – -100.68 (m, 2F); <sup>13</sup>C NMR (DMSO-*d*<sub>6</sub>, 101 MHz, 350 K)  $\delta$  168.9 (C), 160.3 (C), 152.7 (C), 152.6 (C), 152.2 (C), 152.1 (t, <sup>4</sup> $J_{\text{CF}}$  = 2.8 Hz, C), 135.7 (CH), 130.4 (CH), 129.3 (CH), 129.1 (CH), 127.0 (C), 125.2 (CH), 124.6 (CH), 116.9 (t, <sup>1</sup> $J_{\text{CF}}$  = 273.2 Hz, CF<sub>2</sub>), 113.3 (CH), 110.7 (C), 110.1 (CH), 109.8 (C), 102.8 (CH), 99.7 (CH), 63.4 (t, <sup>2</sup> $J_{\text{CF}}$  = 25.9 Hz, CH<sub>2</sub>); Analytical HPLC:  $t_{\text{R}}$  = 10.5 min, >99% purity (10–95% MeCN/H<sub>2</sub>O, linear gradient, with constant 0.1% v/v TFA additive; 20 min run; 1 mL/min flow; ESI; positive ion mode; detection at 500 nm); HRMS (ESI) calcd for C<sub>23</sub>H<sub>16</sub>F<sub>2</sub>NO<sub>4</sub> [M+H]<sup>+</sup> 408.1042, found 408.1040.

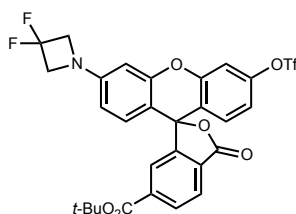

**6-*tert*-Butoxycarbonyl-JF<sub>503</sub> triflate (39):** A vial was charged with 6-*tert*-butoxycarbonylfluorescein ditriflate (**33**; 300 mg, 431  $\mu$ mol), 3,3-difluoroazetidene hydrochloride (56 mg, 431  $\mu$ mol, 1 eq), Pd<sub>2</sub>dba<sub>3</sub> (20 mg, 21.5  $\mu$ mol, 0.05 eq), XPhos (31 mg, 64.6  $\mu$ mol, 0.15 eq), and Cs<sub>2</sub>CO<sub>3</sub> (337 mg, 1.03 mmol, 2.4 eq). The vial was sealed and evacuated/backfilled with nitrogen (3 $\times$ ). Dioxane (1 mL) was added, and the reaction was flushed again with nitrogen (3 $\times$ ). The reaction was then stirred at 100 °C for 1 h. It was subsequently cooled to room temperature, filtered through Celite with CH<sub>2</sub>Cl<sub>2</sub>, and concentrated to dryness. Purification by silica gel chromatography (0–40% EtOAc/hexanes, linear gradient) afforded **39** (63 mg, 23%) as an off-white solid. <sup>1</sup>H NMR (CDCl<sub>3</sub>, 400 MHz)  $\delta$  8.25 (dd,  $J$  = 8.0, 1.1 Hz, 1H), 8.07 (d,  $J$  = 8.0 Hz, 1H), 7.74 (bs, 1H), 7.24 (d,  $J$  = 2.4 Hz, 1H), 6.96 (dd,  $J$  = 8.8, 2.4 Hz, 1H), 6.86 (d,  $J$  = 8.8 Hz, 1H), 6.64 (d,  $J$  = 8.6 Hz, 1H), 6.35 (d,  $J$  = 2.3 Hz, 1H), 6.22 (dd,  $J$  = 8.6, 2.3 Hz, 1H), 4.28 (t, <sup>3</sup> $J_{\text{HF}}$  = 11.7 Hz, 4H), 1.54 (s, 9H); <sup>19</sup>F NMR (CDCl<sub>3</sub>, 376 MHz)  $\delta$  -73.16 (s, 3F), -100.02 (p, <sup>3</sup> $J_{\text{FH}}$  = 11.7 Hz, 2F); <sup>13</sup>C NMR (CDCl<sub>3</sub>, 101 MHz)  $\delta$  168.3 (C), 164.1 (C), 152.7 (C), 152.2 (C), 152.0 (C), 151.62 (t, <sup>4</sup> $J_{\text{CF}}$  = 2.9 Hz, C), 150.2 (C), 138.8 (C), 131.4 (CH), 130.2 (CH), 129.6 (C), 129.2 (CH), 125.3 (CH), 125.0 (CH), 119.5 (C), 118.8 (q,

$^1J_{\text{CF}} = 320.8$  Hz,  $\text{CF}_3$ ), 116.9 (CH), 115.6 (t,  $^1J_{\text{CF}} = 274.6$  Hz,  $\text{CF}_2$ ), 110.7 (CH), 109.7 (CH), 108.0 (C), 99.4 (CH), 83.0 (C), 82.4 (C), 63.4 (t,  $^2J_{\text{CF}} = 26.6$  Hz,  $\text{CH}_2$ ), 28.2 ( $\text{CH}_3$ ); HRMS (ESI) calcd for  $\text{C}_{29}\text{H}_{23}\text{F}_5\text{NO}_8\text{S}$   $[\text{M}+\text{H}]^+$  640.1059, found 640.1068.

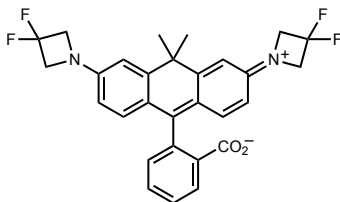

**JF<sub>585</sub> (21):** Method A was used to prepare the title compound from carbofluorescein ditriflate<sup>1</sup> (**31**) and 3,3-difluoroazetidinium hydrochloride (95%, off-white solid).  $^1\text{H}$  NMR ( $\text{CDCl}_3$ , 400 MHz)  $\delta$  8.04 – 7.98 (m, 1H), 7.60 (td,  $J = 7.3, 1.5$  Hz, 1H), 7.56 (td,  $J = 7.3, 1.3$  Hz, 1H), 7.04 (s, 1H), 6.64 (d,  $J = 2.8$  Hz, 2H), 6.63 (d,  $J = 8.7$  Hz, 2H), 6.28 (dd,  $J = 8.6, 2.5$  Hz, 2H), 4.25 (t,  $^3J_{\text{HF}} = 11.8$  Hz, 8H), 1.84 (s, 3H), 1.74 (s, 3H);  $^{19}\text{F}$  NMR ( $\text{CDCl}_3$ , 376 MHz)  $\delta$  -99.95 (p,  $^3J_{\text{FH}} = 11.8$  Hz);  $^{13}\text{C}$  NMR ( $\text{CDCl}_3$ , 101 MHz)  $\delta$  170.6 (C), 155.2 (C), 150.1 (t,  $^4J_{\text{CF}} = 2.7$  Hz, C), 146.9 (C), 134.8 (CH), 129.3 (CH), 129.2 (CH), 127.0 (C), 125.2 (CH), 123.9 (CH), 122.4 (C), 115.9 (t,  $^1J_{\text{CF}} = 274.6$  Hz,  $\text{CF}_2$ ), 111.6 (CH), 109.2 (CH), 87.2 (C), 63.4 (t,  $^2J_{\text{CF}} = 25.9$  Hz,  $\text{CH}_2$ ), 38.6 (C), 35.6 ( $\text{CH}_3$ ), 32.5 ( $\text{CH}_3$ ); Analytical HPLC:  $t_{\text{R}} = 14.9$  min, >99% purity (30–95% MeCN/ $\text{H}_2\text{O}$ , linear gradient, with constant 0.1% v/v TFA additive; 20 min run; 1 mL/min flow; ESI; positive ion mode; detection at 600 nm); HRMS (ESI) calcd for  $\text{C}_{29}\text{H}_{25}\text{F}_4\text{N}_2\text{O}_2$   $[\text{M}+\text{H}]^+$  509.1847, found 509.1843.

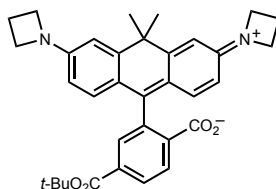

**6-tert-Butoxycarbonyl-JF<sub>608</sub> (47):** Method A was used to prepare the title compound from ditriflate **45** and azetidinium (84%, blue solid).  $^1\text{H}$  NMR ( $\text{CDCl}_3$ , 400 MHz)  $\delta$  8.14 (dd,  $J = 8.0, 1.3$  Hz, 1H), 8.00 (dd,  $J = 8.0, 0.7$  Hz, 1H), 7.61 (dd,  $J = 1.3, 0.8$  Hz, 1H), 6.58 (d,  $J = 2.3$  Hz, 2H), 6.54 (d,  $J = 8.6$  Hz, 2H), 6.21 (dd,  $J = 8.6, 2.4$  Hz, 2H), 3.91 (t,  $J = 7.2$  Hz, 8H), 2.38 (p,  $J = 7.2$  Hz, 4H), 1.83 (s, 3H), 1.73 (s, 3H), 1.53 (s, 9H);  $^{13}\text{C}$  NMR ( $\text{CDCl}_3$ , 101 MHz)  $\delta$  170.1 (C), 164.6 (C), 155.6 (C), 152.4 (C), 146.8 (C), 137.8 (C), 130.3 (C), 130.1 (CH), 128.9 (CH), 125.1 (CH), 124.8 (CH), 119.9 (C), 110.5 (CH), 108.0 (CH), 88.8 (C), 82.3 (C), 52.3 ( $\text{CH}_2$ ), 38.5 (C), 35.5 ( $\text{CH}_3$ ), 32.8 ( $\text{CH}_3$ ), 28.2 ( $\text{CH}_3$ ), 17.0 ( $\text{CH}_2$ ); HRMS (ESI) calcd for  $\text{C}_{34}\text{H}_{37}\text{N}_2\text{O}_4$   $[\text{M}+\text{H}]^+$  537.2753, found 537.2768.

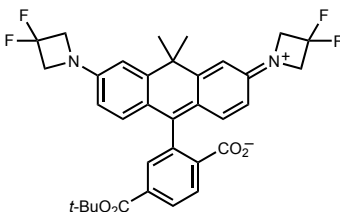

**6-*tert*-Butoxycarbonyl-JF<sub>585</sub> (48):** Method A was used to prepare the title compound from ditriflate **45** and 3,3-difluoroazetidene hydrochloride (93%, off-white solid). <sup>1</sup>H NMR (CDCl<sub>3</sub>, 400 MHz) δ 8.16 (dd, *J* = 8.0, 1.3 Hz, 1H), 8.02 (dd, *J* = 8.0, 0.7 Hz, 1H), 7.60 (dd, *J* = 1.2, 0.8 Hz, 1H), 6.65 (d, *J* = 2.4 Hz, 2H), 6.62 (d, *J* = 8.6 Hz, 2H), 6.29 (dd, *J* = 8.6, 2.5 Hz, 2H), 4.26 (t, <sup>3</sup>*J*<sub>HF</sub> = 11.7 Hz, 8H), 1.85 (s, 3H), 1.75 (s, 3H), 1.53 (s, 9H); <sup>19</sup>F NMR (CDCl<sub>3</sub>, 376 MHz) δ -99.96 (p, <sup>3</sup>*J*<sub>FH</sub> = 11.8 Hz); <sup>13</sup>C NMR (CDCl<sub>3</sub>, 101 MHz) δ 169.9 (C), 164.4 (C), 155.3 (C), 150.1 (t, <sup>4</sup>*J*<sub>CF</sub> = 2.7 Hz, C), 146.8 (C), 138.1 (C), 130.3 (CH), 129.9 (C), 129.2 (CH), 125.1 (CH), 124.9 (CH), 121.7 (C), 115.9 (t, <sup>1</sup>*J*<sub>CF</sub> = 274.6 Hz, CF<sub>2</sub>), 111.8 (CH), 109.3 (CH), 87.5 (C), 82.5 (C), 63.4 (t, <sup>2</sup>*J*<sub>CF</sub> = 26.0 Hz, CH<sub>2</sub>), 38.5 (C), 35.4 (CH<sub>3</sub>), 33.0 (CH<sub>3</sub>), 28.2 (CH<sub>3</sub>); HRMS (ESI) calcd for C<sub>34</sub>H<sub>33</sub>F<sub>4</sub>N<sub>2</sub>O<sub>4</sub> [M+H]<sup>+</sup> 609.2371, found 609.2384.

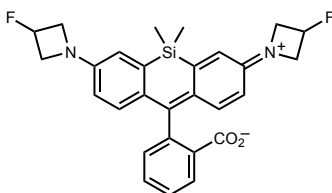

**JF<sub>635</sub> (25):** Method A was used to prepare the title compound from silafluorescein ditriflate<sup>2</sup> (**32**) and 3-fluoroazetidene hydrochloride (78%, off-white solid). <sup>1</sup>H NMR (CDCl<sub>3</sub>, 400 MHz) δ 7.97 (dt, *J* = 7.6, 0.9 Hz, 1H), 7.65 (td, *J* = 7.5, 1.2 Hz, 1H), 7.55 (td, *J* = 7.5, 0.9 Hz, 1H), 7.29 (dt, *J* = 7.7, 0.8 Hz, 1H), 6.80 (d, *J* = 8.7 Hz, 2H), 6.70 (d, *J* = 2.6 Hz, 2H), 6.30 (dd, *J* = 8.7, 2.7 Hz, 2H), 5.41 (dtt, <sup>2</sup>*J*<sub>HF</sub> = 57.0 Hz, *J* = 5.9, 3.7 Hz, 2H), 4.25 – 4.14 (m, 4H), 4.04 – 3.91 (m, 4H), 0.62 (s, 3H), 0.60 (s, 3H); <sup>19</sup>F NMR (CDCl<sub>3</sub>, 376 MHz) δ -180.48 (dtt, *J*<sub>FH</sub> = 57.0, 23.9, 18.2 Hz); <sup>13</sup>C NMR (CDCl<sub>3</sub>, 101 MHz) δ 170.6 (C), 154.1 (C), 150.0 (d, <sup>4</sup>*J*<sub>CF</sub> = 1.0 Hz, C), 137.2 (C), 133.93 (C), 133.86 (CH), 129.0 (CH), 128.1 (CH), 127.0 (C), 126.0 (CH), 124.7 (CH), 116.3 (CH), 112.9 (CH), 91.6 (C), 82.8 (d, <sup>1</sup>*J*<sub>CF</sub> = 204.8 Hz, CFH), 59.6 (d, <sup>2</sup>*J*<sub>CF</sub> = 23.8 Hz, CH<sub>2</sub>), 0.5 (CH<sub>3</sub>), -1.4 (CH<sub>3</sub>); Analytical HPLC: *t*<sub>R</sub> = 14.7 min, 98.7% purity (30–95% MeCN/H<sub>2</sub>O, linear gradient, with constant 0.1% v/v TFA additive; 20 min run; 1 mL/min flow; ESI; positive ion mode; detection at 650 nm); HRMS (ESI) calcd for C<sub>28</sub>H<sub>27</sub>F<sub>2</sub>N<sub>2</sub>O<sub>2</sub>Si [M+H]<sup>+</sup> 489.1804, found 489.1810.

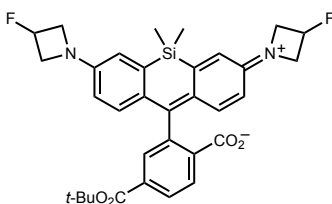

**6-*tert*-Butoxycarbonyl-JF<sub>635</sub> (53):** Method A was used to prepare the title compound from 6-*tert*-butoxycarbonylsilafluorescein ditriflate<sup>2</sup> (**51**) and 3-fluoroazetidene hydrochloride (85%, off-white solid). <sup>1</sup>H NMR (CDCl<sub>3</sub>, 400 MHz) δ 8.12 (dd, *J* = 8.0, 1.3 Hz, 1H), 7.97 (dd, *J* = 7.9, 0.8 Hz, 1H), 7.82 (dd, *J* = 1.3, 0.8 Hz, 1H), 6.88 (d, *J* = 8.7 Hz, 2H), 6.70 (d, *J* = 2.6 Hz, 2H), 6.35 (dd, *J* = 8.7, 2.7 Hz, 2H), 5.41 (dtt, *J* = 57.0, 5.9, 3.7 Hz, 2H), 4.26 – 4.15 (m, 4H), 4.05 – 3.93 (m, 4H), 1.55 (s, 9H), 0.67 (s, 3H), 0.60 (s, 3H); <sup>19</sup>F NMR (CDCl<sub>3</sub>, 376 MHz) δ -180.48 (dtt, *J*<sub>FH</sub> = 57.0, 23.9, 18.2 Hz); <sup>13</sup>C NMR (CDCl<sub>3</sub>, 101 MHz) δ 170.2 (C), 164.4 (C), 155.1 (C), 150.0 (d, <sup>4</sup>*J*<sub>CF</sub> = 1.2 Hz, C), 137.4 (C), 136.3 (C), 133.5 (C), 130.1 (CH), 129.0 (C), 127.8 (CH), 125.8 (CH), 125.1 (CH),

116.3 (CH), 113.3 (CH), 91.4 (C), 82.8 (d,  $^1J_{CF} = 204.8$ , CFH), 82.5 (C), 59.6 (d,  $^2J_{CF} = 23.8$  Hz, CH<sub>2</sub>), 28.2 (CH<sub>3</sub>), 0.2 (CH<sub>3</sub>), -0.7 (CH<sub>3</sub>); HRMS (ESI) calcd for C<sub>33</sub>H<sub>35</sub>F<sub>2</sub>N<sub>2</sub>O<sub>4</sub>Si [M+H]<sup>+</sup> 589.2329, found 589.2335.

### HALOTAG AND SNAP-TAG LIGANDS

**General procedure for deprotection of *tert*-butyl esters (Method B):** The following procedure for **36** is representative. Ester **35** (70 mg, 120  $\mu$ mol) was taken up in CH<sub>2</sub>Cl<sub>2</sub> (2.5 mL), and trifluoroacetic acid (0.5 mL) was added. The reaction was stirred at room temperature for 6 h. Toluene (3 mL) was added; the reaction mixture was concentrated to dryness and then azeotroped with MeOH three times to provide **36** as a dark pink solid (72 mg, 93%, TFA salt). Analytical HPLC and NMR indicated that the material was >95% pure and did not require further purification prior to amide coupling.

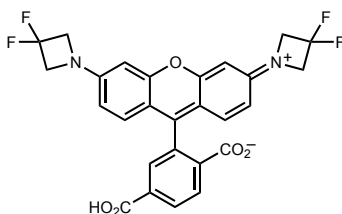

**6-Carboxy-JF<sub>525</sub> (36):** (93%, dark pink solid, TFA salt) <sup>1</sup>H NMR (CD<sub>3</sub>OD, 400 MHz)  $\delta$  8.45 (d,  $J = 8.1$  Hz, 1H), 8.41 (dd,  $J = 8.2, 1.5$  Hz, 1H), 8.01 – 7.97 (m, 1H), 7.24 (d,  $J = 9.1$  Hz, 2H), 6.84 (d,  $J = 2.2$  Hz, 2H), 6.80 (dd,  $J = 9.1, 2.2$  Hz, 2H), 4.72 (t,  $^3J_{HF} = 11.6$  Hz, 8H); <sup>19</sup>F NMR (CD<sub>3</sub>OD, 376 MHz)  $\delta$  -75.59 (s, 3F), -100.90 (p,  $^3J_{FH} = 11.6$  Hz, 4F); <sup>13</sup>C NMR (CD<sub>3</sub>OD, 101 MHz)  $\delta$  167.6 (C), 167.3 (C), 159.1 (C), 157.7 (t,  $^4J_{CF} = 3.9$  Hz, C), 136.1 (C), 135.8 (C), 135.4 (C), 132.9 (CH), 132.7 (CH), 132.6 (CH), 132.1 (CH), 119.2 (C), 116.5 (t,  $^1J_{CF} = 271.9$  Hz, CF<sub>2</sub>), 116.1 (C), 115.2 (CH), 97.4 (CH), 64.2 (t,  $^2J_{CF} = 29.1$  Hz, CH<sub>2</sub>); Analytical HPLC:  $t_R = 11.2$  min, >99% purity (10–95% MeCN/H<sub>2</sub>O, linear gradient, with constant 0.1% v/v TFA additive; 20 min run; 1 mL/min flow; ESI; positive ion mode; detection at 525 nm); HRMS (ESI) calcd for C<sub>27</sub>H<sub>19</sub>F<sub>4</sub>N<sub>2</sub>O<sub>5</sub> [M+H]<sup>+</sup> 527.1225, found 527.1232.

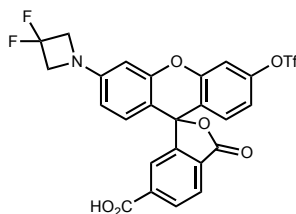

**6-Carboxy-JF<sub>503</sub> triflate (40):** Method B was used to convert ester **39** into the title compound (88%, red-orange solid, TFA salt). <sup>1</sup>H NMR (DMSO-*d*<sub>6</sub>, 400 MHz)  $\delta$  13.62 (s, 1H), 8.26 (dd,  $J = 8.0, 1.2$  Hz, 1H), 8.16 (dd,  $J = 8.0, 0.4$  Hz, 1H), 7.79 – 7.75 (m, 1H), 7.66 (d,  $J = 2.5$  Hz, 1H), 7.23 (dd,  $J = 8.8, 2.5$  Hz, 1H), 7.09 (d,  $J = 8.9$  Hz, 1H), 6.71 (d,  $J = 8.6$  Hz, 1H), 6.55 (d,  $J = 2.3$  Hz, 1H), 6.39 (dd,  $J = 8.7, 2.3$  Hz, 1H), 4.36 (t,  $^3J_{HF} = 12.3$  Hz, 4H); <sup>19</sup>F NMR (DMSO-*d*<sub>6</sub>, 376 MHz)  $\delta$  -72.20 (s, 3F), -98.42 (p,  $^3J_{FH} = 12.3$  Hz, 2F); <sup>13</sup>C NMR (DMSO-*d*<sub>6</sub>, 101 MHz)  $\delta$

167.6 (C), 166.0 (C), 152.2 (C), 151.8 (t,  $^4J_{CF} = 2.7$  Hz, C), 151.4 (C), 151.1 (C), 149.7 (C), 138.0 (C), 131.3 (CH), 130.7 (CH), 128.9 (CH), 125.5 (CH), 124.5 (CH), 119.4 (C), 118.2 (q,  $^1J_{CF} = 321.0$  Hz, CF<sub>3</sub>), 117.1 (CH), 116.4 (t,  $^1J_{CF} = 273.1$  Hz, CF<sub>2</sub>), 110.6 (CH), 110.3 (CH), 107.3 (C), 99.3 (CH), 81.7 (C), 62.8 (t,  $^2J_{CF} = 25.7$  Hz, CH<sub>2</sub>); HRMS (ESI) calcd for C<sub>25</sub>H<sub>15</sub>F<sub>5</sub>NO<sub>8</sub>S [M+H]<sup>+</sup> 584.0433, found 584.0446.

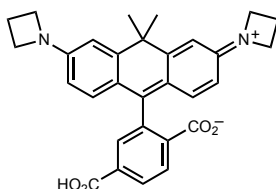

**6-Carboxy-JF<sub>608</sub> (49):** Method B was used to convert ester **47** into the title compound (98%, dark blue solid, TFA salt). <sup>1</sup>H NMR (CD<sub>3</sub>OD, 400 MHz) δ 8.34 (dd,  $J = 8.2, 0.5$  Hz, 1H), 8.31 (dd,  $J = 8.2, 1.5$  Hz, 1H), 7.84 (dd,  $J = 1.5, 0.5$  Hz, 1H), 6.93 (d,  $J = 9.1$  Hz, 2H), 6.82 (d,  $J = 2.2$  Hz, 2H), 6.39 (dd,  $J = 9.1, 2.3$  Hz, 2H), 4.33 (t,  $J = 7.6$  Hz, 8H), 2.55 (p,  $J = 7.6$  Hz, 4H), 1.82 (s, 3H), 1.70 (s, 3H); <sup>19</sup>F NMR (CD<sub>3</sub>OD, 376 MHz) δ -75.24 (s); <sup>13</sup>C NMR (CD<sub>3</sub>OD, 101 MHz) δ 167.9 (C), 167.5 (C), 165.4 (C), 158.0 (C), 156.8 (C), 139.3 (C), 137.6 (CH), 136.2 (C), 135.5 (C), 132.5 (CH), 132.4 (CH), 131.5 (CH), 121.8 (C), 111.9 (CH), 109.7 (CH), 52.9 (CH<sub>2</sub>), 42.8 (C), 35.6 (CH<sub>3</sub>), 32.0 (CH<sub>3</sub>), 16.8 (CH<sub>2</sub>); Analytical HPLC:  $t_R = 9.2$  min, >99% purity (10–95% MeCN/H<sub>2</sub>O, linear gradient, with constant 0.1% v/v TFA additive; 20 min run; 1 mL/min flow; ESI; positive ion mode; detection at 600 nm); HRMS (ESI) calcd for C<sub>30</sub>H<sub>29</sub>N<sub>2</sub>O<sub>4</sub> [M+H]<sup>+</sup> 481.2127, found 481.2120.

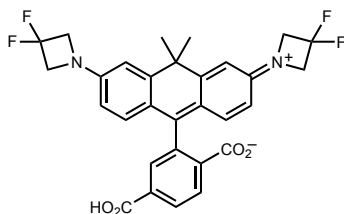

**6-Carboxy-JF<sub>585</sub> (50):** Method B was used to convert ester **48** into the title compound (99%, dark blue-purple solid, TFA salt). <sup>1</sup>H NMR (CD<sub>3</sub>OD, 400 MHz) δ 8.30 (dd,  $J = 8.1, 1.4$  Hz, 1H), 8.23 – 8.15 (m, 1H), 7.69 (s, 1H), 6.92 (d,  $J = 2.1$  Hz, 2H), 6.79 (d,  $J = 7.6$  Hz, 2H), 6.47 (dd,  $J = 8.8, 2.3$  Hz, 2H), 4.45 (t,  $^3J_{HF} = 11.0$  Hz, 8H), 1.88 (s, 3H), 1.76 (s, 3H); <sup>19</sup>F NMR (CD<sub>3</sub>OD, 376 MHz) δ -75.81 (s, 3F), -100.32 (m, 4F); <sup>13</sup>C NMR (101 MHz, DMSO-*d*<sub>6</sub>, 350 K) δ 168.3 (C), 165.5 (C), 154.4 (C), 149.9 (t,  $^4J_{CF} = 2.8$  Hz, C), 146.3 (C), 136.8 (C), 129.9 (CH), 128.9 (C), 128.1 (CH), 124.9 (CH), 123.7 (CH), 120.3 (C), 116.2 (t,  $^1J_{CF} = 273.3$  Hz, CF<sub>2</sub>), 111.8 (CH), 109.5 (CH), 62.5 (t,  $^2J_{CF} = 25.6$  Hz, CH<sub>2</sub>), 37.8 (C), 34.0 (CH<sub>3</sub>), 32.8 (CH<sub>3</sub>); Analytical HPLC:  $t_R = 11.9$  min, >99% purity (30–95% MeCN/H<sub>2</sub>O, linear gradient, with constant 0.1% v/v TFA additive; 20 min run; 1 mL/min flow; ESI; positive ion mode; detection at 600 nm); HRMS (ESI) calcd for C<sub>30</sub>H<sub>25</sub>F<sub>4</sub>N<sub>2</sub>O<sub>4</sub> [M+H]<sup>+</sup> 553.1745, found 553.1741.

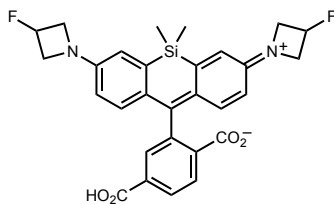

**6-Carboxy-JF<sub>635</sub> (54):** Method B was used to convert ester **53** into the title compound (91%, dark blue solid, TFA salt). <sup>1</sup>H NMR (CD<sub>3</sub>OD, 400 MHz) δ 8.25 (dd, *J* = 8.0, 1.4 Hz, 1H), 8.11 (d, *J* = 8.1 Hz, 1H), 7.84 (dd, *J* = 1.4, 0.7 Hz, 1H), 6.87 (d, *J* = 2.6 Hz, 2H), 6.83 (d, *J* = 8.8 Hz, 2H), 6.39 (dd, *J* = 8.9, 2.6 Hz, 2H), 5.43 (dtt, *J* = 57.3, 6.1, 3.3 Hz, 2H), 4.41 – 4.20 (m, 4H), 4.16 – 4.01 (m, 4H), 0.65 (s, 3H), 0.56 (s, 3H); <sup>19</sup>F NMR (376 MHz, CD<sub>3</sub>OD) δ -75.92 (s, 3F), -180.00 – -180.61 (m, 2F); <sup>13</sup>C NMR (101 MHz, DMSO-*d*<sub>6</sub>, 350 K) δ 168.6 (C), 165.5 (C), 154.6 (C), 149.5 (d, <sup>4</sup>*J*<sub>CF</sub> = 1.3 Hz, C), 136.3 (C), 135.4 (C), 131.8 (C), 129.6 (CH), 127.8 (C), 127.0 (CH), 125.4 (CH), 123.9 (CH), 115.8 (CH), 113.1 (CH), 83.0 (d, <sup>1</sup>*J*<sub>CF</sub> = 200.9 Hz, CHF), 58.8 (d, <sup>2</sup>*J*<sub>CF</sub> = 58.8 Hz, CH<sub>2</sub>), -0.6 (CH<sub>3</sub>), -1.4 (CH<sub>3</sub>); Analytical HPLC: *t*<sub>R</sub> = 11.8 min, 98.1% purity (10–95% MeCN/H<sub>2</sub>O, linear gradient, with constant 0.1% v/v TFA additive; 20 min run; 1 mL/min flow; ESI; positive ion mode; detection at 650 nm); HRMS (ESI) calcd for C<sub>29</sub>H<sub>27</sub>F<sub>2</sub>N<sub>2</sub>O<sub>4</sub>Si [M+H]<sup>+</sup> 533.1703, found 533.1710.

**General procedure for preparation of HaloTag and SNAP-tag ligands (Method C):** The following procedure for **13** is representative. 6-Carboxy-JF<sub>525</sub> (**36**; 30 mg, 46.8 μmol) was combined with DSC (26 mg, 103 μmol, 2.2 eq) in DMF (2.5 mL). After adding Et<sub>3</sub>N (39 μL, 281 μmol, 6 eq) and DMAP (0.6 mg, 4.7 μmol, 0.1 eq), the reaction was stirred at room temperature for 1 h while shielded from light. HaloTag(O<sub>2</sub>)amine (HTL-NH<sub>2</sub>, **37**; TFA salt; 26 mg, 117 μmol, 2.5 eq, Promega) was then added. The reaction was stirred an additional 2 h at room temperature, then concentrated *in vacuo*. The crude material was purified by reverse phase HPLC (10–90% MeCN/H<sub>2</sub>O, linear gradient, with constant 0.1% v/v TFA additive) followed by flash chromatography on silica gel (0–10% MeOH/CH<sub>2</sub>Cl<sub>2</sub>, linear gradient) to provide 21.3 mg (62%) of **13** as a pink solid.

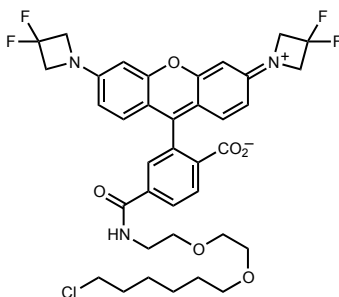

**JF<sub>525</sub>-HaloTag ligand (13):** (62%, pink solid) <sup>1</sup>H NMR (CDCl<sub>3</sub>, 400 MHz) δ 8.05 (dd, *J* = 8.0, 0.8 Hz, 1H), 7.98 (dd, *J* = 8.0, 1.4 Hz, 1H), 7.55 (dd, *J* = 1.5, 0.8 Hz, 1H), 6.75 – 6.70 (m, 1H), 6.62 (d, *J* = 8.6 Hz, 2H), 6.31 (d, *J* = 2.4 Hz, 2H), 6.17 (dd, *J* = 8.6, 2.4 Hz, 2H), 4.26 (t, <sup>3</sup>*J*<sub>HF</sub> = 11.7 Hz, 8H), 3.69 – 3.57 (m, 6H), 3.56 – 3.48 (m, 4H), 3.40 (t, *J* = 6.6 Hz, 2H), 1.79 – 1.70 (m, 2H), 1.54 – 1.48 (m, 2H), 1.46 – 1.38 (m, 2H), 1.37 – 1.29 (m, 2H); <sup>19</sup>F NMR (CDCl<sub>3</sub>, 376 MHz) δ -100.04 (p, <sup>3</sup>*J*<sub>FH</sub> = 11.8 Hz); Analytical HPLC: *t*<sub>R</sub> = 14.2 min, >99% purity (10–95%

MeCN/H<sub>2</sub>O, linear gradient, with constant 0.1% v/v TFA additive; 20 min run; 1 mL/min flow; ESI; positive ion mode; detection at 550 nm); HRMS (ESI) calcd for C<sub>37</sub>H<sub>39</sub>ClF<sub>4</sub>N<sub>3</sub>O<sub>6</sub> [M+H]<sup>+</sup> 732.2458, found 732.2457.

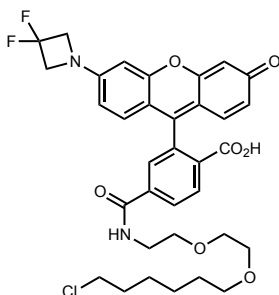

**JF<sub>503</sub>-HaloTag ligand (17):** Acid **40** (20 mg, 28.7 μmol) was combined with TSTU (19 mg, 63.1 μmol, 2.2 eq) in DMF (1.5 mL). After adding DIEA (30 μL, 172 μmol, 6 eq), the reaction was stirred at room temperature for 1 h while shielded from light. HaloTag(O<sub>2</sub>)amine (HTL-NH<sub>2</sub>, **37**; TFA salt; 23 mg, 68.8 μmol, 2.4 eq, Promega) was then added, and the reaction was stirred for 1 h at room temperature. After adding MeOH (1 mL) and 1 N NaOH (300 μL) and stirring an additional 3 h at room temperature, the reaction was acidified with 1 N HCl (325 μL) and concentrated to dryness. The crude material was purified by reverse phase HPLC (10–75% MeCN/H<sub>2</sub>O, linear gradient, with constant 0.1% v/v TFA additive) to provide 19.4 mg (88%, TFA salt) of **17** as an orange solid. <sup>1</sup>H NMR (CD<sub>3</sub>OD, 400 MHz) δ 8.72 (t, *J* = 5.2 Hz, 1H), 8.26 (d, *J* = 8.2 Hz, 1H), 8.19 (dd, *J* = 8.1, 1.4 Hz, 1H), 7.76 – 7.71 (m, 1H), 7.07 – 6.88 (m, 3H), 6.83 – 6.74 (m, 1H), 6.72 – 6.66 (m, 1H), 6.65 – 6.56 (m, 1H), 4.53 (t, *J* = 11.6 Hz, 4H), 3.65 – 3.47 (m, 10H), 3.41 (t, *J* = 6.5 Hz, 2H), 1.77 – 1.66 (m, 2H), 1.56 – 1.27 (m, 6H); <sup>19</sup>F NMR (CD<sub>3</sub>OD, 376 MHz) δ -75.44 (s, 3F), -100.39 – -100.65 (m, 2F); Analytical HPLC: t<sub>R</sub> = 12.7 min, >99% purity (10–95% MeCN/H<sub>2</sub>O, linear gradient, with constant 0.1% v/v TFA additive; 20 min run; 1 mL/min flow; ESI; positive ion mode; detection at 500 nm); HRMS (ESI) calcd for C<sub>34</sub>H<sub>36</sub>ClF<sub>2</sub>N<sub>2</sub>O<sub>7</sub> [M+H]<sup>+</sup> 657.2174, found 657.2190.

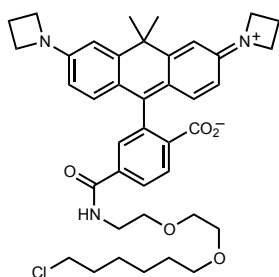

**JF<sub>608</sub>-HaloTag ligand (22):** Acid **49** was subjected to Method C to prepare the title compound (72%, dark blue solid). <sup>1</sup>H NMR (CDCl<sub>3</sub>, 400 MHz) δ 8.02 (dd, *J* = 8.0, 0.6 Hz, 1H), 7.94 (dd, *J* = 8.0, 1.4 Hz, 1H), 7.42 – 7.40 (m, 1H), 6.68 – 6.62 (m, 1H), 6.57 (d, *J* = 2.3 Hz, 2H), 6.52 (d, *J* = 8.6 Hz, 2H), 6.20 (dd, *J* = 8.6, 2.4 Hz, 2H), 3.91 (t, *J* = 7.4 Hz, 8H), 3.64 – 3.56 (m, 6H), 3.55 – 3.48 (m, 4H), 3.38 (t, *J* = 6.6 Hz, 2H), 2.37 (p, *J* = 7.2 Hz, 4H), 1.83 (s, 3H), 1.77 – 1.68 (m, 2H), 1.72 (s, 3H), 1.56 – 1.47 (m, 2H), 1.46 – 1.36 (m, 2H), 1.36 – 1.28 (m, 2H); Analytical HPLC: t<sub>R</sub> = 14.2 min, >99% purity (10–95% MeCN/H<sub>2</sub>O, linear gradient, with constant 0.1% v/v TFA additive; 20

min run; 1 mL/min flow; ESI; positive ion mode; UV detection at 600 nm); HRMS (ESI) calcd for C<sub>40</sub>H<sub>49</sub>ClN<sub>3</sub>O<sub>5</sub> [M+H]<sup>+</sup> 686.3361, found 686.3375.

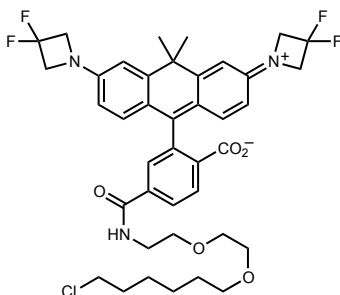

**JF<sub>585</sub>-HaloTag ligand (23):** Acid **50** was subjected to Method C to prepare the title compound (54%, off-white/bluish solid). <sup>1</sup>H NMR (CDCl<sub>3</sub>, 400 MHz) δ 8.04 (dd, *J* = 8.0, 0.5 Hz, 1H), 7.93 (dd, *J* = 8.0, 1.4 Hz, 1H), 7.44 – 7.40 (m, 1H), 6.70 – 6.65 (m, 1H), 6.64 (d, *J* = 2.4 Hz, 2H), 6.60 (d, *J* = 8.6 Hz, 2H), 6.28 (dd, *J* = 8.6, 2.4 Hz, 2H), 4.25 (t, <sup>3</sup>*J*<sub>HF</sub> = 11.7 Hz, 8H), 3.66 – 3.57 (m, 6H), 3.56 – 3.48 (m, 4H), 3.39 (t, *J* = 6.6 Hz, 2H), 1.85 (s, 3H), 1.79 – 1.70 (m, 5H), 1.57 – 1.48 (m, 2H), 1.46 – 1.37 (m, 2H), 1.37 – 1.26 (m, 2H); <sup>19</sup>F NMR (CDCl<sub>3</sub>, 376 MHz) δ -99.94 (p, <sup>3</sup>*J*<sub>FH</sub> = 11.8 Hz); Analytical HPLC: *t*<sub>R</sub> = 15.4 min, >99% purity (30–95% MeCN/H<sub>2</sub>O, linear gradient, with constant 0.1% v/v TFA additive; 20 min run; 1 mL/min flow; ESI; positive ion mode; detection at 600 nm); HRMS (ESI) calcd for C<sub>40</sub>H<sub>45</sub>ClF<sub>4</sub>N<sub>3</sub>O<sub>5</sub> [M+H]<sup>+</sup> 758.2978, found 758.2989.

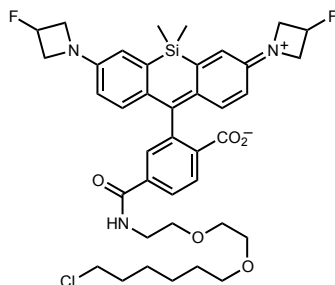

**JF<sub>635</sub>-HaloTag ligand (27):** Acid **54** was subjected to Method C to prepare the title compound (61%, blue-green solid). <sup>1</sup>H NMR (CDCl<sub>3</sub>, 400 MHz) δ 7.99 (dd, *J* = 7.9, 0.7 Hz, 1H), 7.89 (dd, *J* = 8.0, 1.4 Hz, 1H), 7.69 (dd, *J* = 1.4, 0.8 Hz, 1H), 6.81 (d, *J* = 8.7 Hz, 2H), 6.79 – 6.75 (m, 1H), 6.69 (d, *J* = 2.6 Hz, 2H), 6.31 (dd, *J* = 8.7, 2.7 Hz, 2H), 5.52 – 5.30 (m, 2H), 4.26 – 4.14 (m, 4H), 4.04 – 3.92 (m, 4H), 3.68 – 3.58 (m, 6H), 3.58 – 3.53 (m, 2H), 3.50 (t, *J* = 6.6 Hz, 2H), 3.40 (t, *J* = 6.7 Hz, 2H), 1.77 – 1.68 (m, 2H), 1.54 – 1.48 (m, 2H), 1.44 – 1.36 (m, 2H), 1.35 – 1.27 (m, 2H), 0.66 (s, 3H), 0.59 (s, 3H); <sup>19</sup>F NMR (CDCl<sub>3</sub>, 376 MHz) δ -180.49 (dtt, *J*<sub>FH</sub> = 56.9, 23.9, 18.2 Hz); Analytical HPLC: *t*<sub>R</sub> = 16.8 min, 98.7% purity (10–95% MeCN/H<sub>2</sub>O, linear gradient, with constant 0.1% v/v TFA additive; 20 min run; 1 mL/min flow; ESI; positive ion mode; detection at 633 nm); HRMS (ESI) calcd for C<sub>39</sub>H<sub>47</sub>ClF<sub>2</sub>N<sub>3</sub>O<sub>5</sub>Si [M+H]<sup>+</sup> 738.2936, found 738.2953.



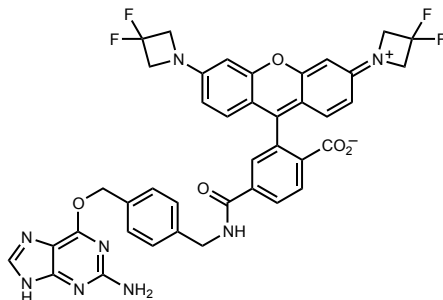

**JF<sub>525</sub>-SNAP-tag ligand (15):** Acid **36** and STL-NH<sub>2</sub> (**38**, NEB) were subjected to Method C to prepare the title compound (72%, red-orange solid). <sup>1</sup>H NMR (CD<sub>3</sub>OD, 400 MHz) δ 8.13 (dd, *J* = 8.1, 1.4 Hz, 1H), 8.07 (dd, *J* = 8.0, 0.6 Hz, 1H), 7.80 (s, 1H), 7.65 – 7.60 (m, 1H), 7.42 (d, *J* = 8.1 Hz, 2H), 7.28 (d, *J* = 8.1 Hz, 2H), 6.71 (d, *J* = 8.7 Hz, 2H), 6.46 (d, *J* = 2.3 Hz, 2H), 6.35 (dd, *J* = 8.7, 2.4 Hz, 2H), 5.48 (s, 2H), 4.49 (s, 2H), 4.31 (t, <sup>3</sup>*J*<sub>HF</sub> = 11.9 Hz, 8H); <sup>19</sup>F NMR (CD<sub>3</sub>OD, 376 MHz) δ -100.07 – -100.32 (m); Analytical HPLC: *t*<sub>R</sub> = 10.8 min, >99% purity (10–95% MeCN/H<sub>2</sub>O, linear gradient, with constant 0.1% v/v TFA additive; 20 min run; 1 mL/min flow; ESI; positive ion mode; detection at 550 nm); HRMS (ESI) calcd for C<sub>40</sub>H<sub>31</sub>F<sub>4</sub>N<sub>8</sub>O<sub>5</sub> [M+H]<sup>+</sup> 779.2348, found 779.2355.

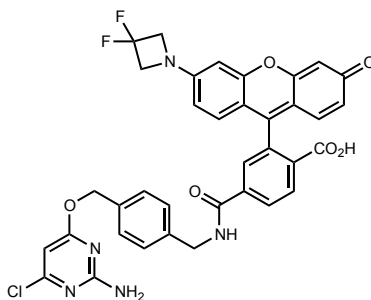

**JF<sub>503</sub>-cpSNAP-tag ligand (20):** Acid **40** and cpSTL-NH<sub>2</sub> (**41**, NEB) were subjected to the same procedure described for **17** to prepare the title compound (71%, orange solid, TFA salt). <sup>1</sup>H NMR (CD<sub>3</sub>OD, 400 MHz) δ 9.20 (t, *J* = 6.0 Hz, 1H), 8.35 (d, *J* = 8.2 Hz, 1H), 8.23 (dd, *J* = 8.2, 1.6 Hz, 1H), 7.80 (d, *J* = 1.3 Hz, 1H), 7.36 (AB quartet, *v*<sub>A</sub> = 2951.5 Hz, *v*<sub>B</sub> = 2938.7 Hz, *J*<sub>AB</sub> = 8.3 Hz, 4H), 7.19 – 7.10 (m, 2H), 7.07 (d, *J* = 1.9 Hz, 1H), 6.92 (dd, *J* = 9.0, 2.0 Hz, 1H), 6.80 (d, *J* = 1.9 Hz, 1H), 6.77 – 6.70 (m, 1H), 6.07 (s, 1H), 5.32 (s, 2H), 4.67 (t, <sup>3</sup>*J*<sub>HF</sub> = 11.6 Hz, 4H), 4.60 – 4.53 (m, 2H); <sup>19</sup>F NMR (CD<sub>3</sub>OD, 376 MHz) δ -75.60 (s, 3F), -100.77 (p, <sup>3</sup>*J*<sub>FH</sub> = 11.7 Hz, 2F); Analytical HPLC: *t*<sub>R</sub> = 12.4 min, >99% purity (10–95% MeCN/H<sub>2</sub>O, linear gradient, with constant 0.1% v/v TFA additive; 20 min run; 1 mL/min flow; ESI; positive ion mode; detection at 500 nm); HRMS (ESI) calcd for C<sub>36</sub>H<sub>27</sub>ClF<sub>2</sub>N<sub>5</sub>O<sub>6</sub> [M+H]<sup>+</sup> 698.1612, found 698.1627.

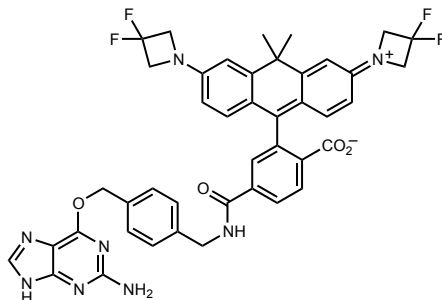

**JF<sub>585</sub>-SNAP-tag ligand (24):** Acid **50** and STL-NH<sub>2</sub> (**38**, NEB) were subjected to Method C to prepare the title compound (71%, off-white solid). <sup>1</sup>H NMR (CD<sub>3</sub>OD, 400 MHz) δ 8.07 (dd, *J* = 8.0, 1.3 Hz, 1H), 8.04 (dd, *J* = 8.0, 0.7 Hz, 1H), 7.81 (s, 1H), 7.48 – 7.44 (m, 1H), 7.42 (d, *J* = 8.2 Hz, 2H), 7.26 (d, *J* = 8.2 Hz, 2H), 6.81 (d, *J* = 2.4 Hz, 2H), 6.58 (d, *J* = 8.6 Hz, 2H), 6.39 (dd, *J* = 8.6, 2.4 Hz, 2H), 5.48 (s, 2H), 4.47 (s, 2H), 4.24 (t, <sup>3</sup>*J*<sub>HF</sub> = 12.0 Hz, 8H), 1.85 (s, 3H), 1.74 (s, 3H); <sup>19</sup>F NMR (CD<sub>3</sub>OD, 376 MHz) δ -99.82 (p, <sup>3</sup>*J*<sub>FH</sub> = 11.9 Hz); Analytical HPLC: *t*<sub>R</sub> = 13.3 min, >99% purity (10–95% MeCN/H<sub>2</sub>O, linear gradient, with constant 0.1% v/v TFA additive; 20 min run; 1 mL/min flow; ESI; positive ion mode; detection at 600 nm); HRMS (ESI) calcd for C<sub>43</sub>H<sub>37</sub>F<sub>4</sub>N<sub>8</sub>O<sub>4</sub> [M+H]<sup>+</sup> 805.2868, found 805.2876.

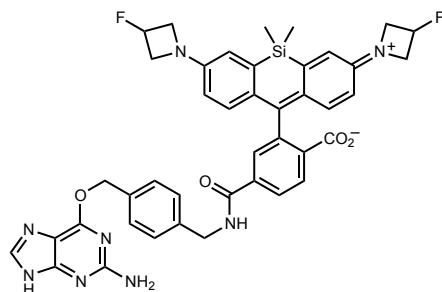

**JF<sub>635</sub>-SNAP-tag ligand (29):** Acid **54** and STL-NH<sub>2</sub> (**38**, NEB) were subjected to Method C to prepare the title compound (48%, off-white solid). <sup>1</sup>H NMR (CD<sub>3</sub>OD, 400 MHz) δ 8.02 (dd, *J* = 8.0, 1.3 Hz, 1H), 8.00 (dd, *J* = 8.0, 0.8 Hz, 1H), 7.81 (s, 1H), 7.68 – 7.63 (m, 1H), 7.47 (d, *J* = 8.2 Hz, 2H), 7.32 (d, *J* = 8.2 Hz, 2H), 6.79 (d, *J* = 2.6 Hz, 2H), 6.75 (d, *J* = 8.7 Hz, 2H), 6.39 (dd, *J* = 8.7, 2.7 Hz, 2H), 5.52 (s, 2H), 5.50 – 5.31 (m, 2H), 4.52 (s, 2H), 4.25 – 4.12 (m, 4H), 3.98 – 3.86 (m, 4H), 0.60 (s, 3H), 0.54 (s, 3H); <sup>19</sup>F NMR (CD<sub>3</sub>OD, 376 MHz) δ -179.91 (dtt, *J*<sub>FH</sub> = 57.5, 23.8, 19.3 Hz); Analytical HPLC: *t*<sub>R</sub> = 12.6 min, >99% purity (10–95% MeCN/H<sub>2</sub>O, linear gradient, with constant 0.1% v/v TFA additive; 20 min run; 1 mL/min flow; ESI; positive ion mode; detection at 633 nm); HRMS (ESI) calcd for C<sub>42</sub>H<sub>39</sub>F<sub>2</sub>N<sub>8</sub>O<sub>4</sub>Si [M+H]<sup>+</sup> 785.2826, found 785.2828.

## REFERENCES

- 1 Grimm, J. B. *et al.* Carbofluoresceins and carborhodamines as scaffolds for high-contrast fluorogenic probes. *ACS Chem. Biol.* **8**, 1303-1310 (2013).
- 2 Grimm, J. B. *et al.* A general method to improve fluorophores for live-cell and single-molecule microscopy. *Nat. Methods* **12**, 244–250 (2015).

Origin Bruker BioSpin GmbH  
 Solvent CDCl3  
 Temperature 300.0  
 Pulse Sequence zg30  
 Experiment 1D  
 Number of Scans 16  
 Acquisition Date 2013-07-19T21:05:00  
 Spectrometer Frequency 400.13  
 Spectral Width 8223.7  
 Lowest Frequency -1646.8  
 Nucleus 1H  
 Acquired Size 32768  
 Spectral Size 65536

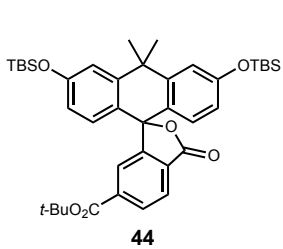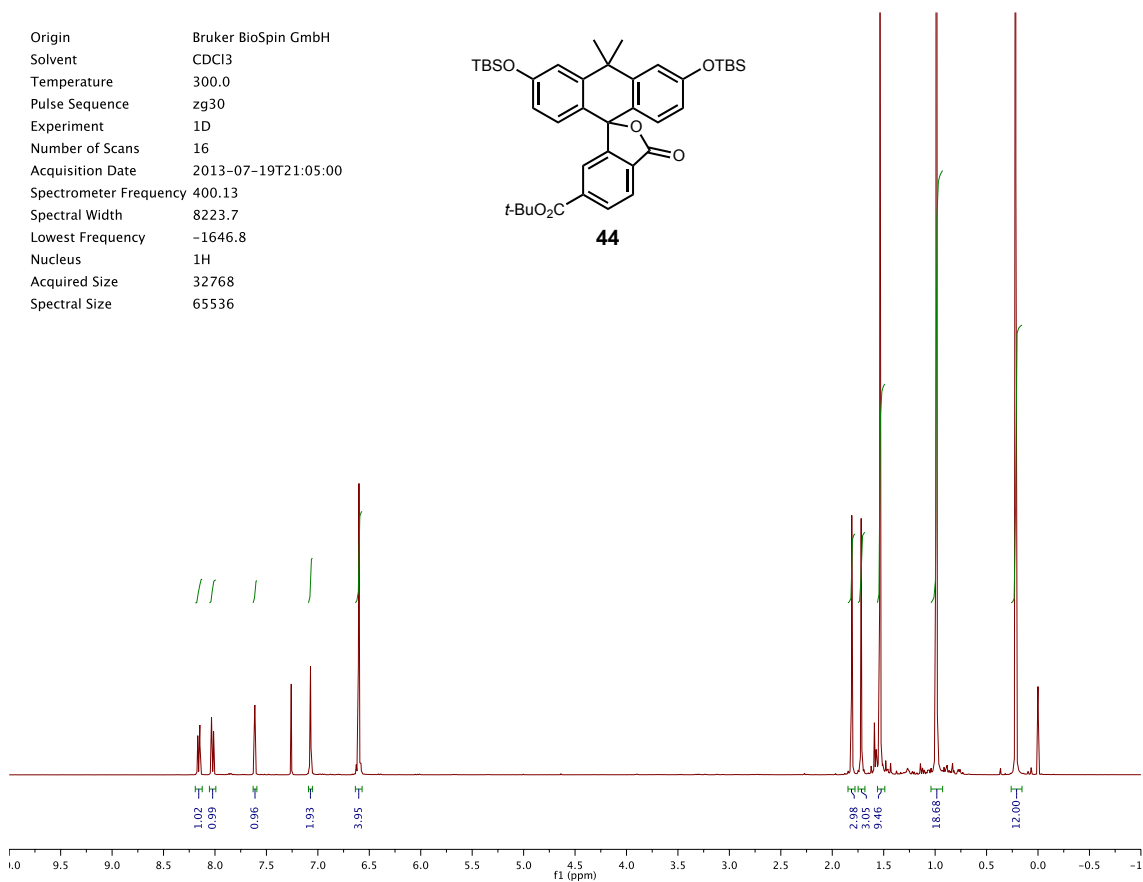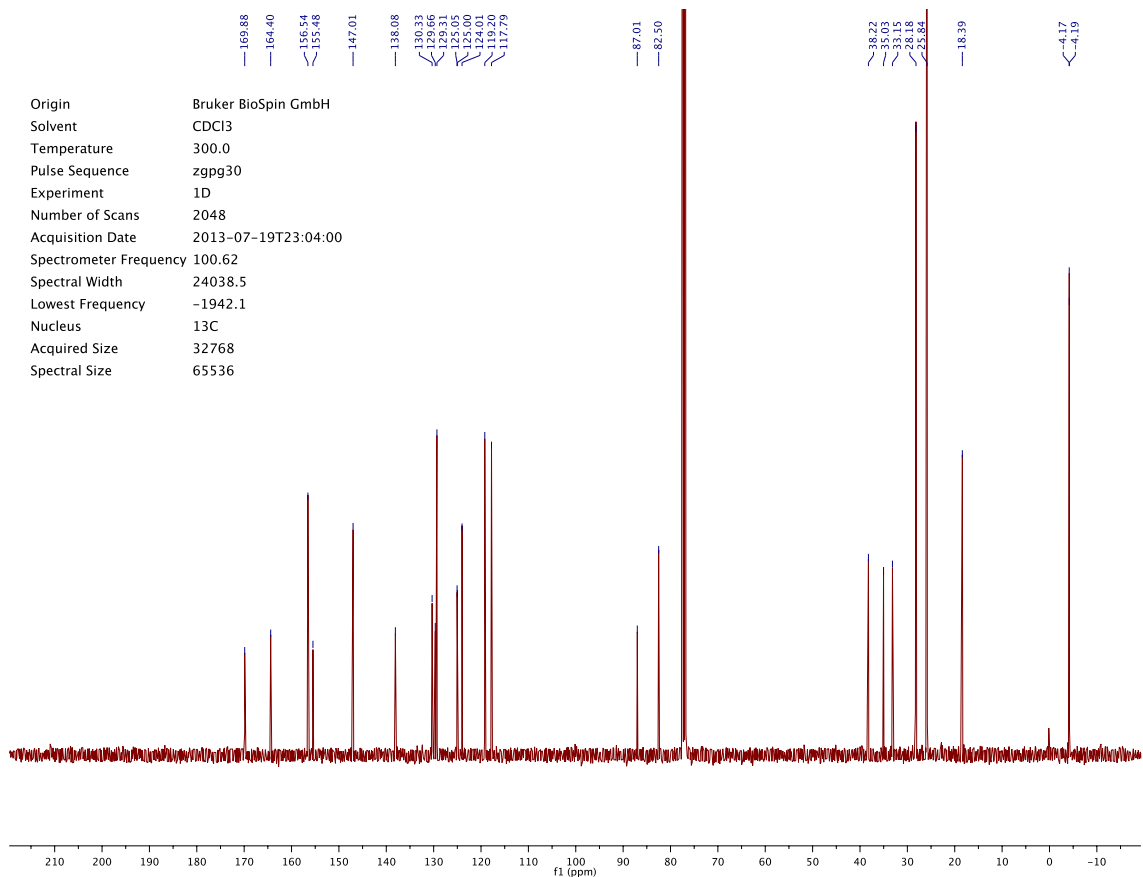

Origin Bruker BioSpin GmbH  
 Solvent CDCl3  
 Temperature 300.0  
 Pulse Sequence zgpg30  
 Experiment 1D  
 Number of Scans 2048  
 Acquisition Date 2013-07-19T23:04:00  
 Spectrometer Frequency 100.62  
 Spectral Width 24038.5  
 Lowest Frequency -1942.1  
 Nucleus 13C  
 Acquired Size 32768  
 Spectral Size 65536

Origin Bruker BioSpin GmbH  
 Solvent CDCl3  
 Temperature 300.0  
 Pulse Sequence zg30  
 Experiment 1D  
 Number of Scans 16  
 Acquisition Date 2013-08-05T21:05:00  
 Spectrometer Frequency 400.13  
 Spectral Width 8223.7  
 Lowest Frequency -1646.0  
 Nucleus 1H  
 Acquired Size 32768  
 Spectral Size 65536

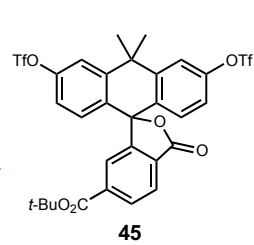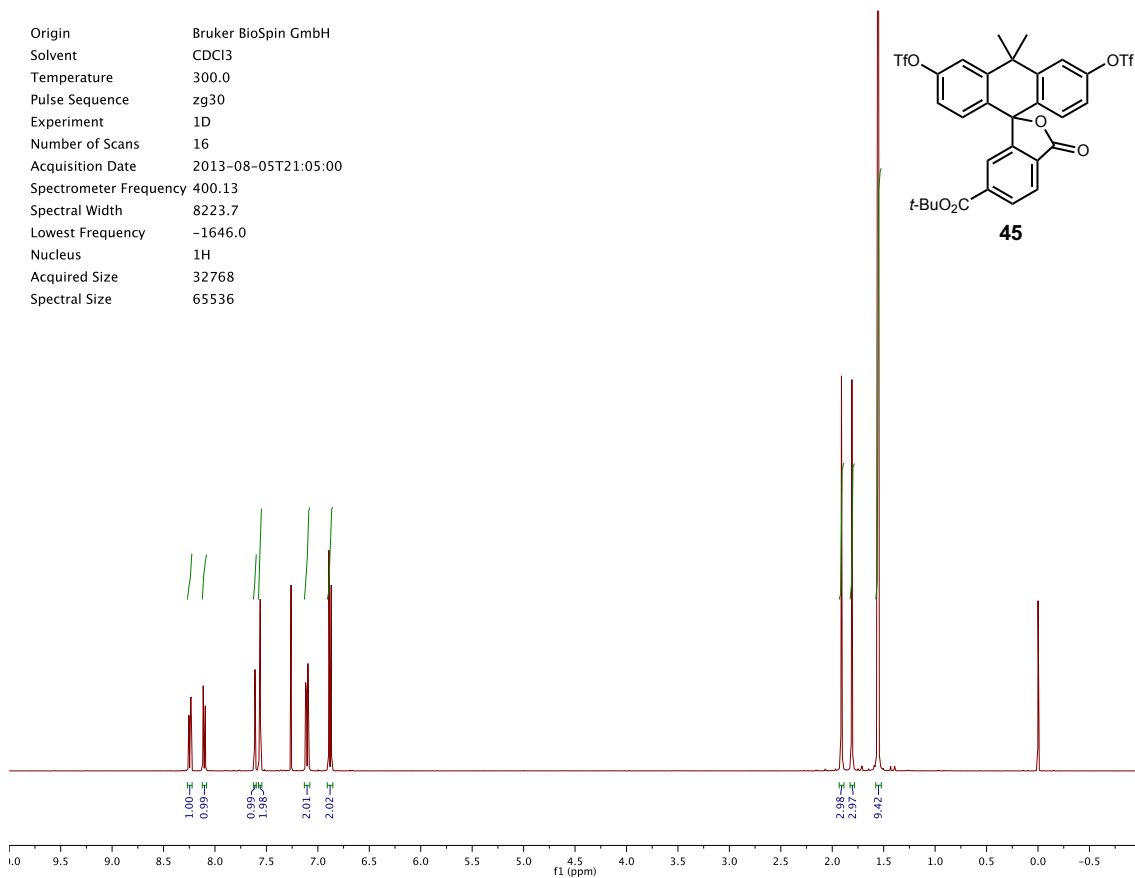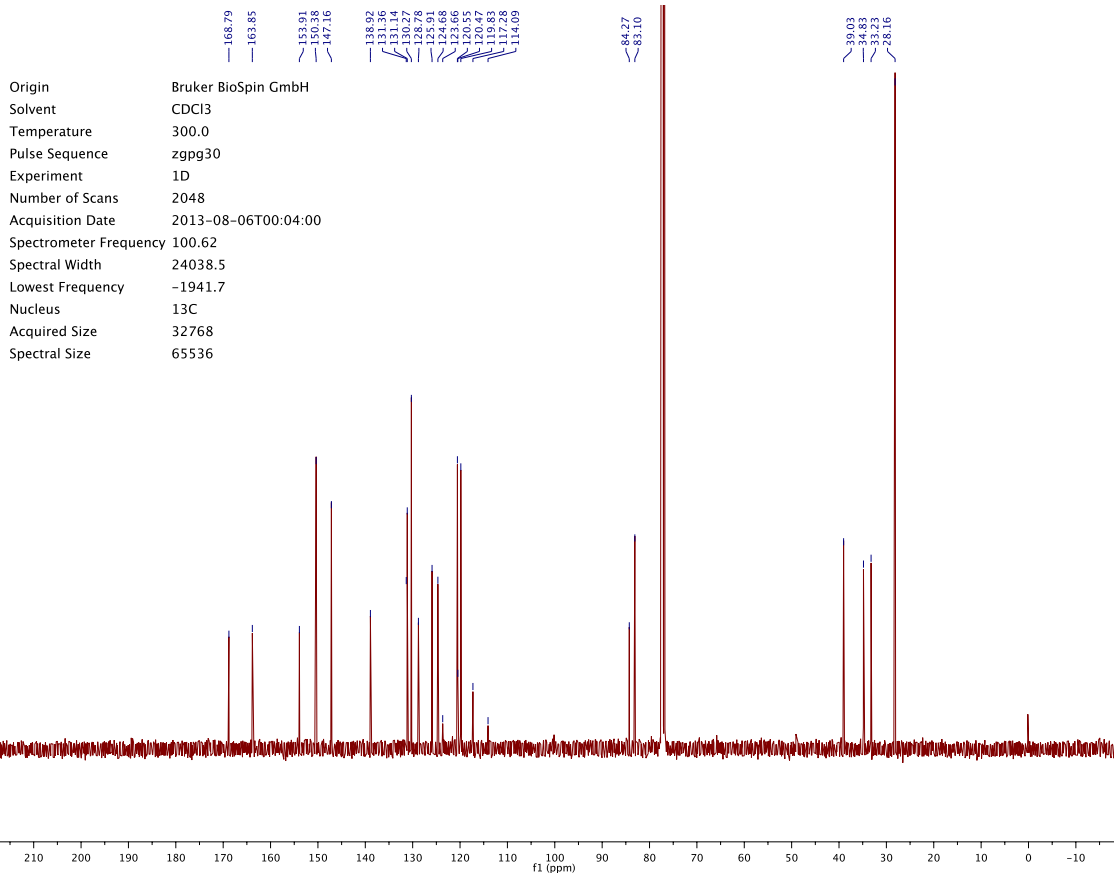

Origin Bruker BioSpin GmbH  
 Solvent CDCl3  
 Temperature 300.0  
 Pulse Sequence zgpg30  
 Experiment 1D  
 Number of Scans 2048  
 Acquisition Date 2013-08-06T00:04:00  
 Spectrometer Frequency 100.62  
 Spectral Width 24038.5  
 Lowest Frequency -1941.7  
 Nucleus 13C  
 Acquired Size 32768  
 Spectral Size 65536

Origin Bruker BioSpin GmbH  
 Solvent MeOD  
 Temperature 300.0  
 Pulse Sequence zg30  
 Experiment 1D  
 Number of Scans 16  
 Acquisition Date 2014-08-15T08:49:00  
 Spectrometer Frequency 400.13  
 Spectral Width 8223.7  
 Lowest Frequency -1644.3  
 Nucleus 1H  
 Acquired Size 32768  
 Spectral Size 65536

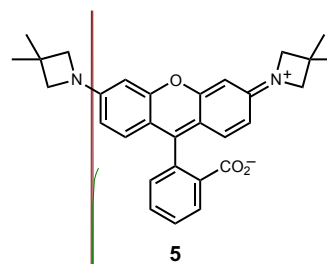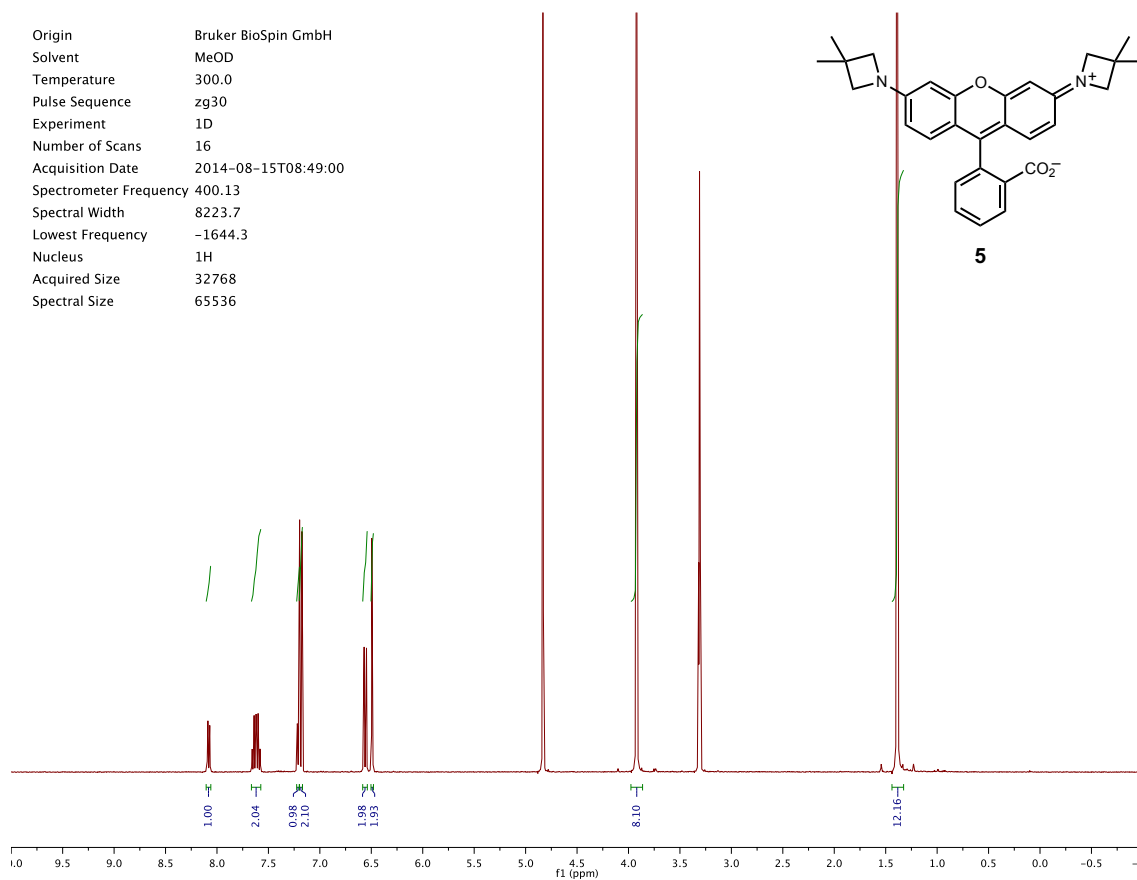

Origin Bruker BioSpin GmbH  
 Solvent MeOD  
 Temperature 300.0  
 Pulse Sequence zgpg30  
 Experiment 1D  
 Number of Scans 2048  
 Acquisition Date 2014-09-23T23:03:00  
 Spectrometer Frequency 100.62  
 Spectral Width 24038.5  
 Lowest Frequency -1816.6  
 Nucleus 13C  
 Acquired Size 32768  
 Spectral Size 65536

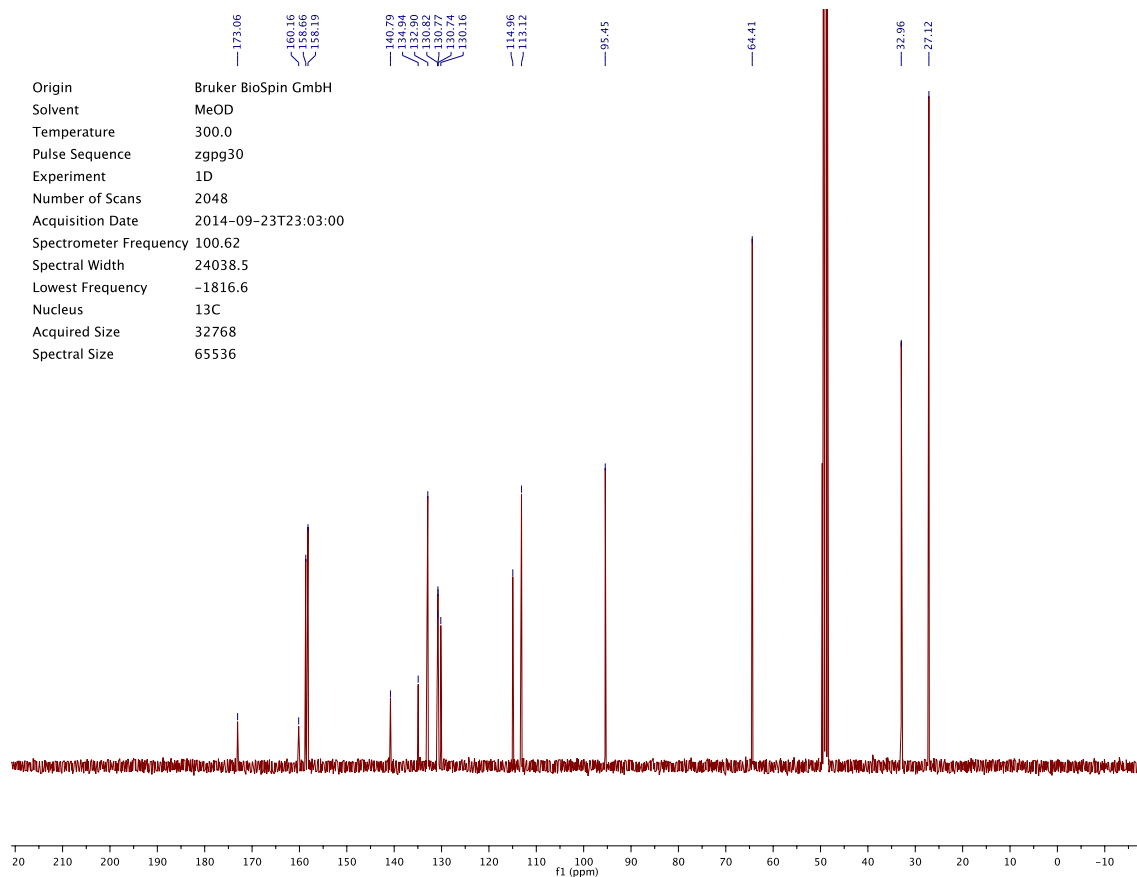

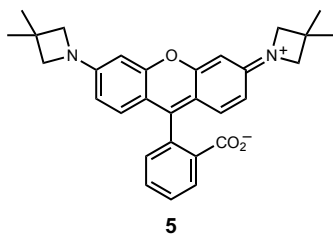

DAD1 C, Sig=550.8 Ref=off (2014\_08\DAILYSEQUENCE\_LC 2014-08-15 09-13-45\2014\_08000002.D)

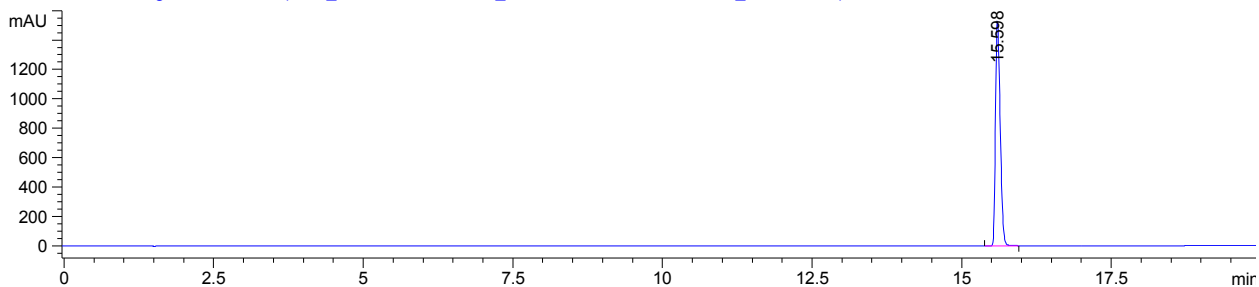

\*MSD1 SPC, time=15.588:15.699 of C:\CHEM32\1\DATA\2014\_08\DAILYSEQUENCE\_LC 2014-08-15 09-13-45\2014\_08000002.D ES-API

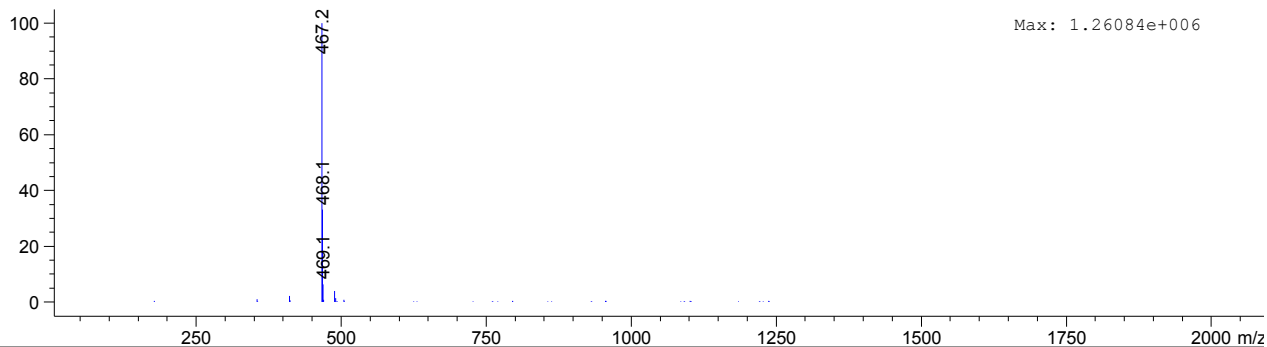

Origin Bruker BioSpin GmbH  
 Solvent MeOD  
 Temperature 300.0  
 Pulse Sequence zg30  
 Experiment 1D  
 Number of Scans 16  
 Acquisition Date 2014-10-07T08:48:00  
 Spectrometer Frequency 400.13  
 Spectral Width 8223.7  
 Lowest Frequency -1644.1  
 Nucleus 1H  
 Acquired Size 32768  
 Spectral Size 65536

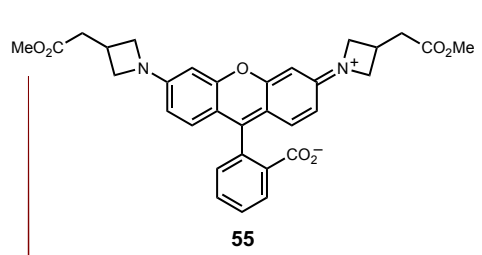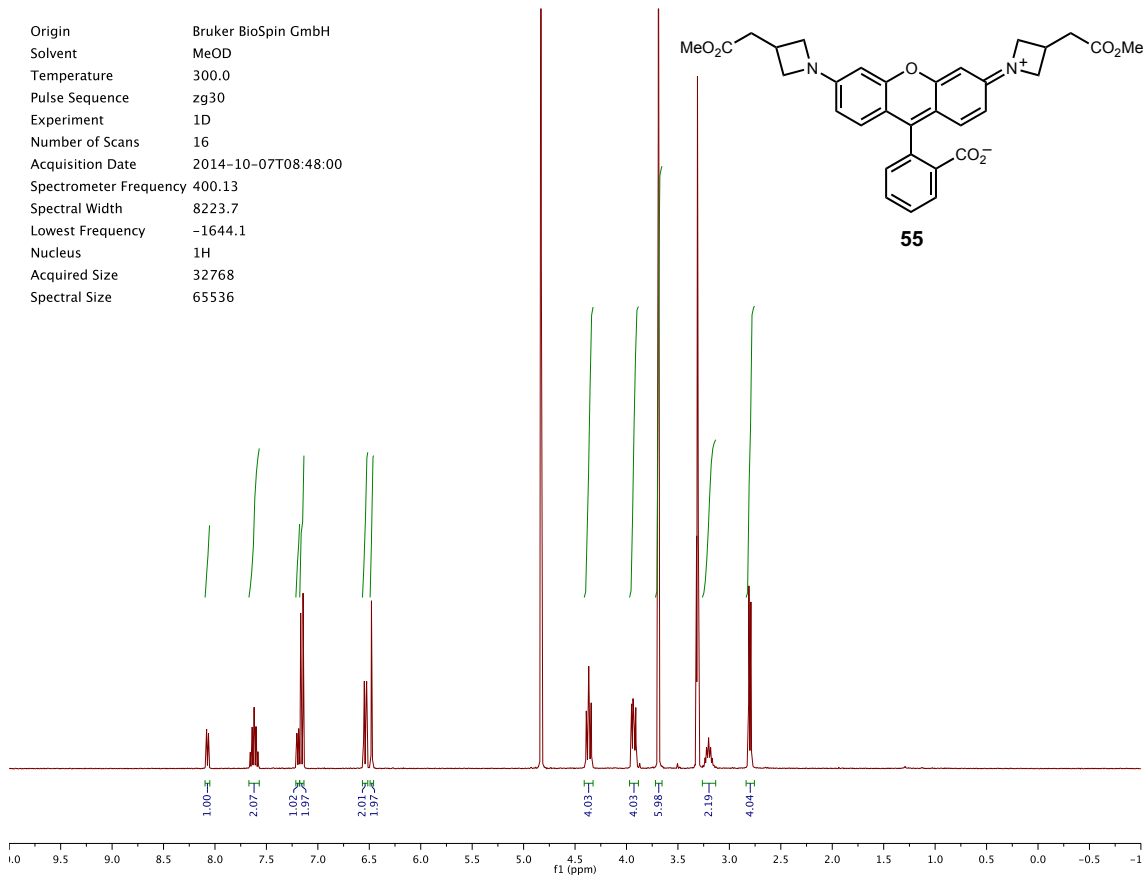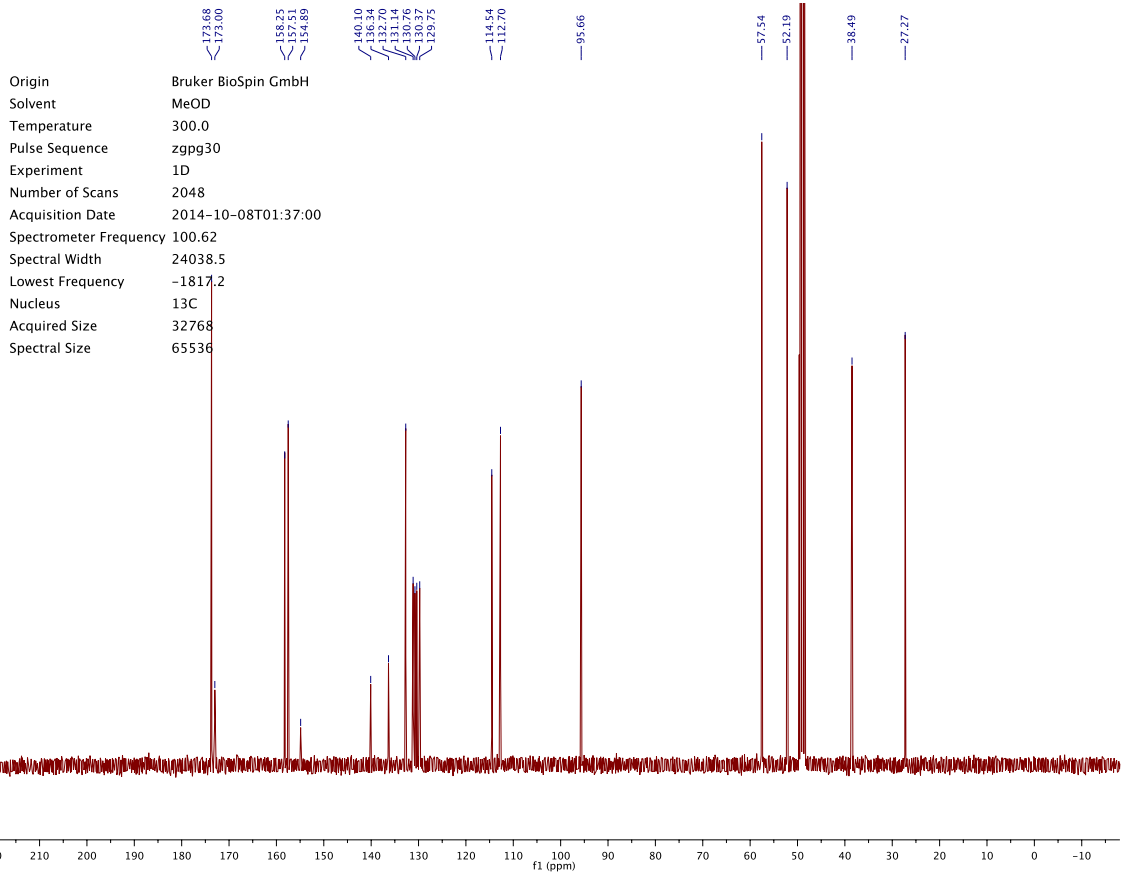

Origin Bruker BioSpin GmbH  
 Solvent MeOD  
 Temperature 300.0  
 Pulse Sequence zgpg30  
 Experiment 1D  
 Number of Scans 2048  
 Acquisition Date 2014-10-08T01:37:00  
 Spectrometer Frequency 100.62  
 Spectral Width 24038.5  
 Lowest Frequency -1817.2  
 Nucleus 13C  
 Acquired Size 32768  
 Spectral Size 65536

Origin Bruker BioSpin GmbH  
 Solvent MeOD  
 Temperature 300.0  
 Pulse Sequence zg30  
 Experiment 1D  
 Number of Scans 16  
 Acquisition Date 2014-09-25T14:46:00  
 Spectrometer Frequency 400.13  
 Spectral Width 8223.7  
 Lowest Frequency -1644.0  
 Nucleus 1H  
 Acquired Size 32768  
 Spectral Size 65536

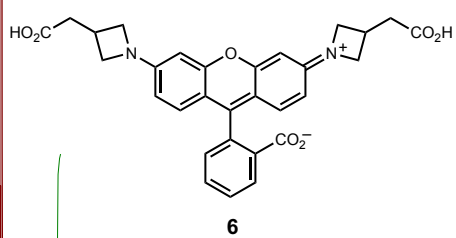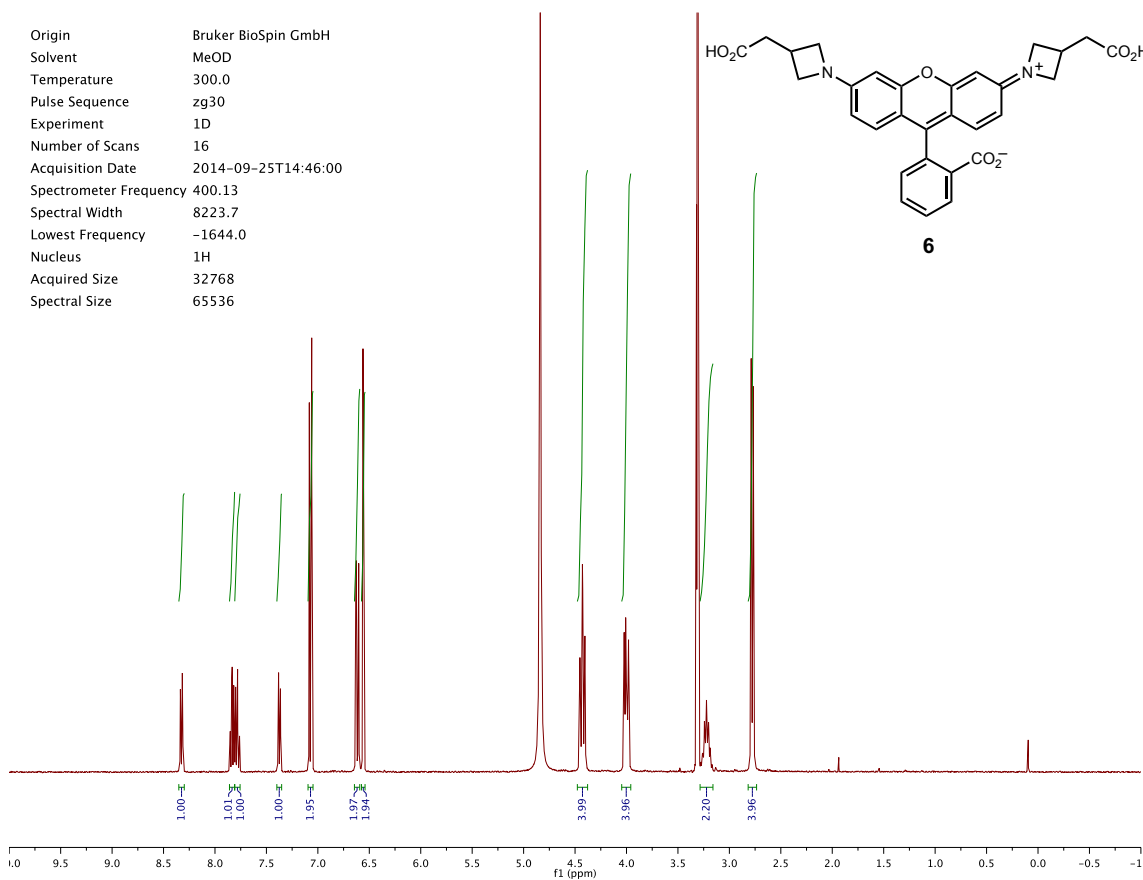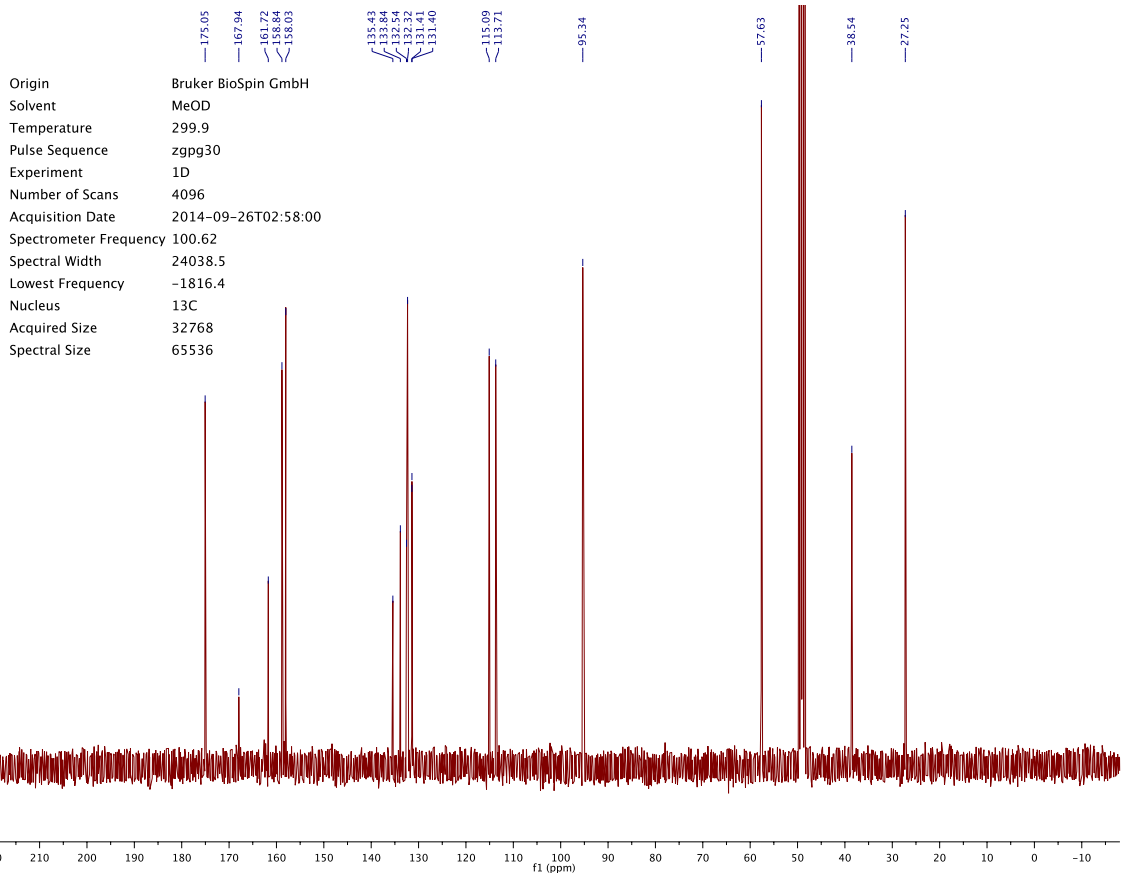

Origin Bruker BioSpin GmbH  
 Solvent MeOD  
 Temperature 299.9  
 Pulse Sequence zgpg30  
 Experiment 1D  
 Number of Scans 4096  
 Acquisition Date 2014-09-26T02:58:00  
 Spectrometer Frequency 100.62  
 Spectral Width 24038.5  
 Lowest Frequency -1816.4  
 Nucleus 13C  
 Acquired Size 32768  
 Spectral Size 65536



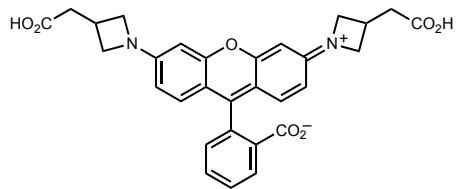

6

DAD1 C, Sig=550,8 Ref=off (2014\_09\DAILYSEQUENCE\_LC 2014-09-24 10-18-54\2014\_07000005.D)

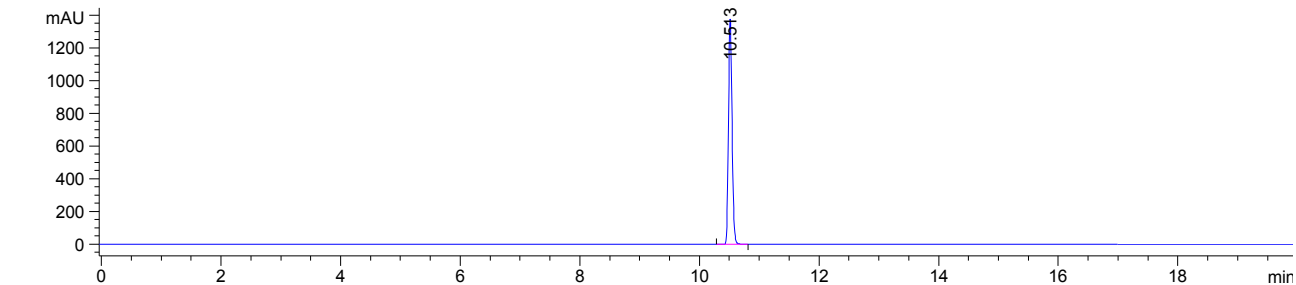

\*MSD1 SPC, time=10.507:10.600 of C:\CHEM32\1\DATA\2014\_09\DAILYSEQUENCE\_LC 2014-09-24 10-18-54\2014\_07000005.D ES-API

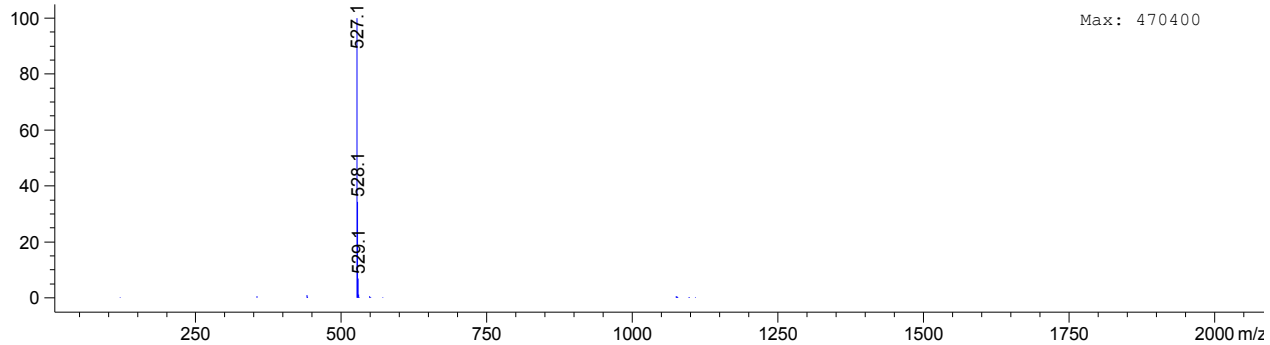

Origin Bruker BioSpin GmbH  
 Solvent MeOD  
 Temperature 300.0  
 Pulse Sequence zg30  
 Experiment 1D  
 Number of Scans 16  
 Acquisition Date 2014-09-19T11:39:00  
 Spectrometer Frequency 400.13  
 Spectral Width 8223.7  
 Lowest Frequency -1644.1  
 Nucleus 1H  
 Acquired Size 32768  
 Spectral Size 65536

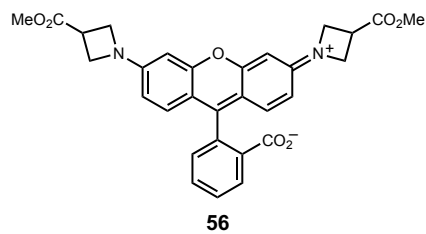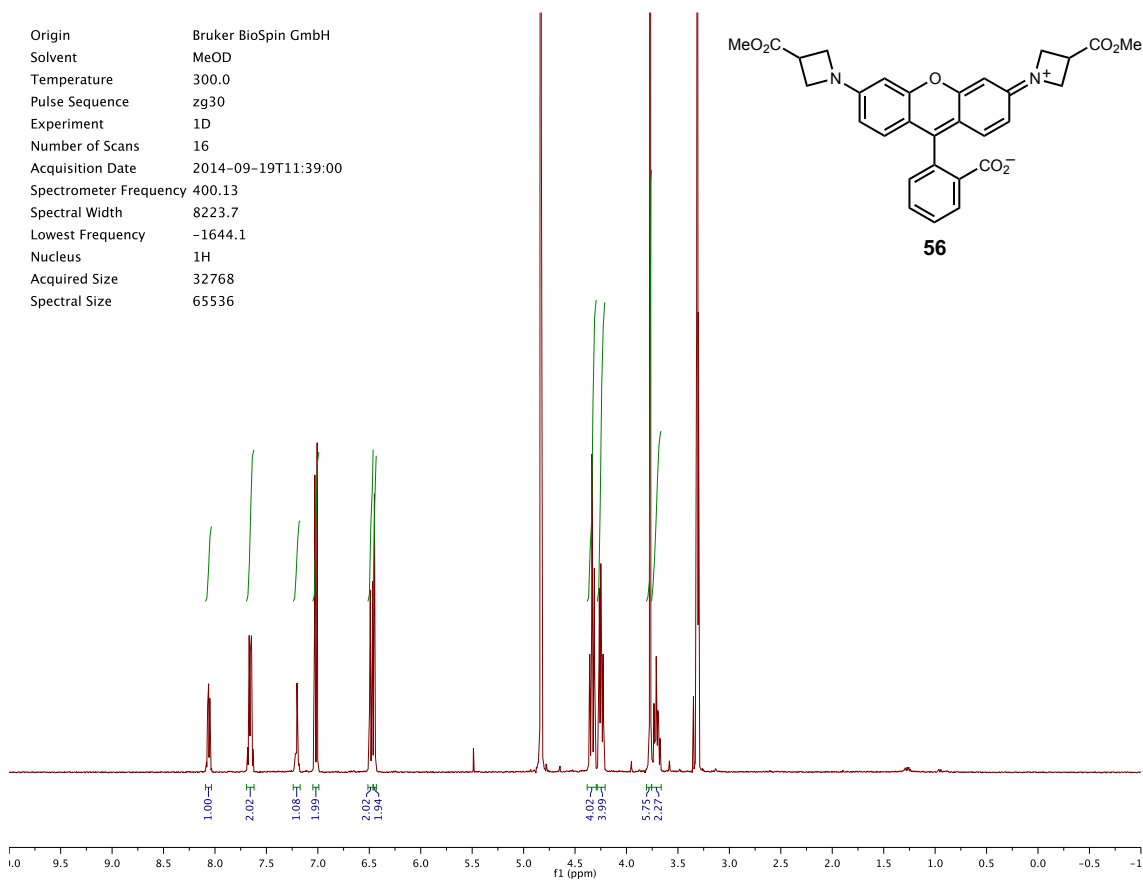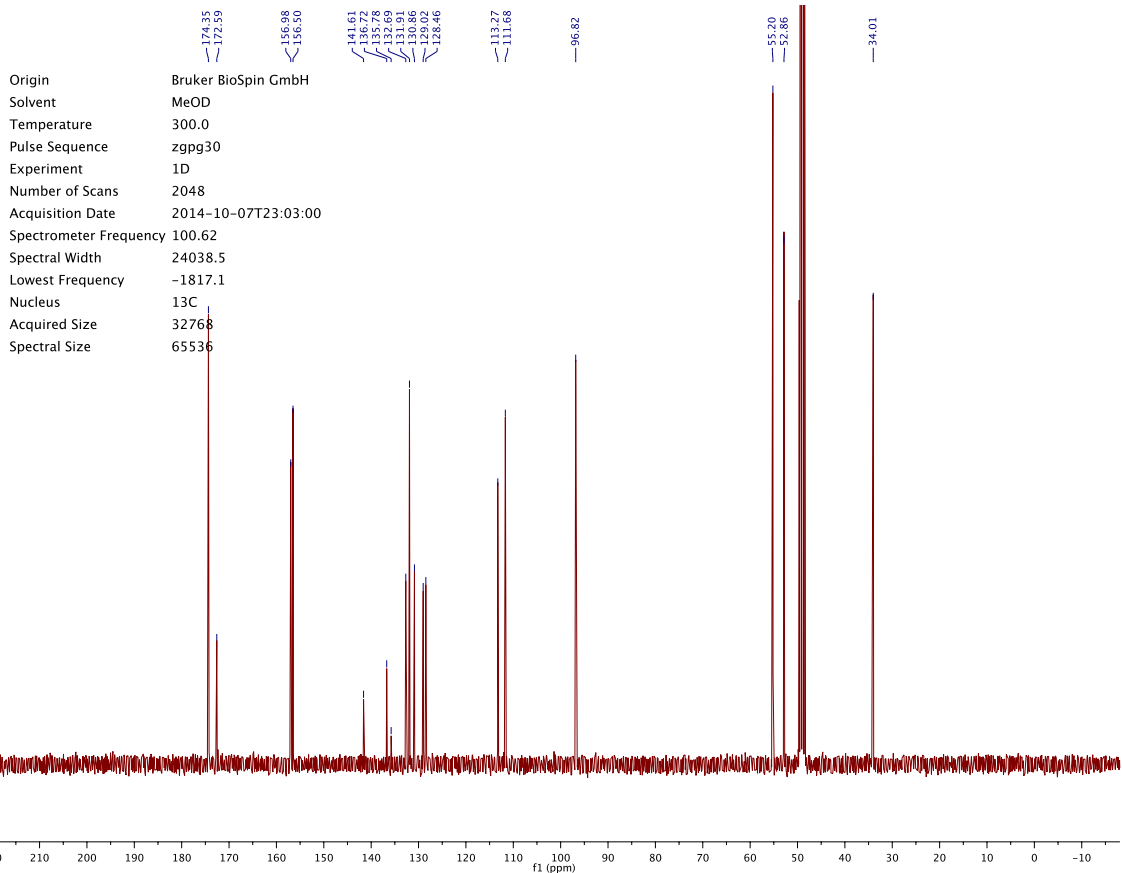

Origin Bruker BioSpin GmbH  
 Solvent MeOD  
 Temperature 300.0  
 Pulse Sequence zgpg30  
 Experiment 1D  
 Number of Scans 2048  
 Acquisition Date 2014-10-07T23:03:00  
 Spectrometer Frequency 100.62  
 Spectral Width 24038.5  
 Lowest Frequency -1817.1  
 Nucleus 13C  
 Acquired Size 32768  
 Spectral Size 65536

Origin Bruker BioSpin GmbH  
 Solvent MeOD  
 Temperature 294.9  
 Pulse Sequence zg30  
 Experiment 1D  
 Number of Scans 16  
 Acquisition Date 2014-09-02T16:16:00  
 Spectrometer Frequency 400.13  
 Spectral Width 8223.7  
 Lowest Frequency -1644.2  
 Nucleus 1H  
 Acquired Size 32768  
 Spectral Size 65536

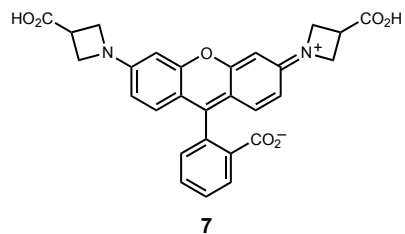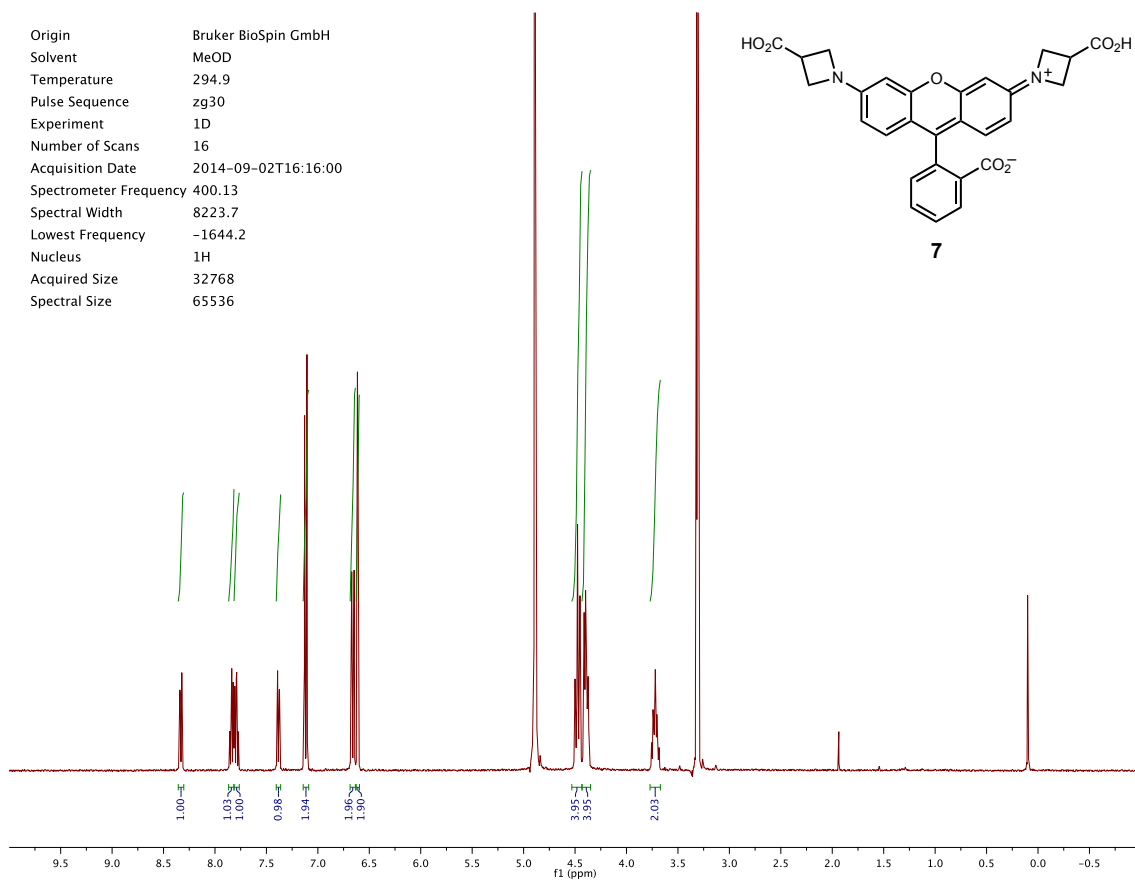

Origin Bruker BioSpin GmbH  
 Solvent MeOD  
 Temperature 300.0  
 Pulse Sequence zgpg30  
 Experiment 1D  
 Number of Scans 2048  
 Acquisition Date 2014-10-10T07:12:00  
 Spectrometer Frequency 100.62  
 Spectral Width 24038.5  
 Lowest Frequency -1817.3  
 Nucleus 13C  
 Acquired Size 32768  
 Spectral Size 65536

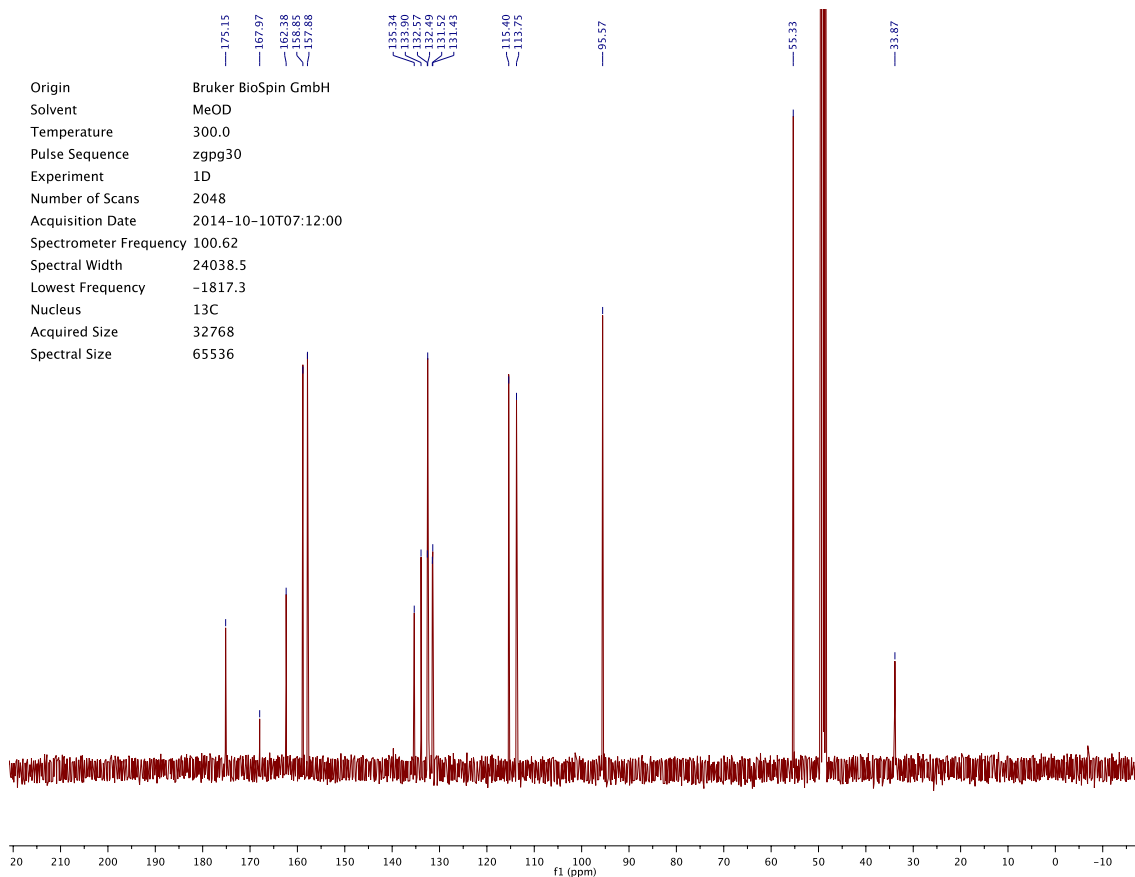

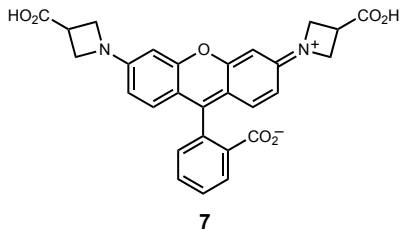

DAD1 D, Sig=550,8 Ref=off (2014\_08\DAILYSEQUENCE\_LC 2014-08-28 10-21-22\2014\_08000001.D)

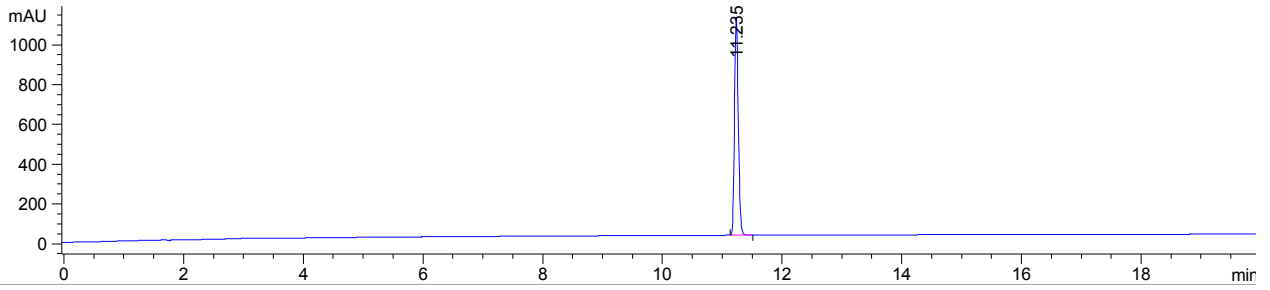

\*MSD1 SPC, time=11.213:11.343 of C:\CHEM32\1\DATA\2014\_08\DAILYSEQUENCE\_LC 2014-08-28 10-21-22\2014\_08000001.D ES-API

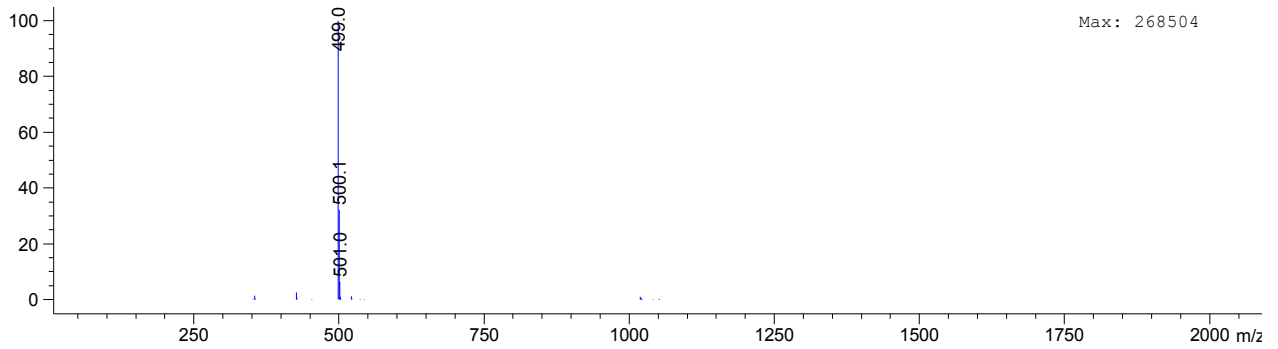

Origin Bruker BioSpin GmbH  
 Solvent MeOD  
 Temperature 294.8  
 Pulse Sequence zg30  
 Experiment 1D  
 Number of Scans 16  
 Acquisition Date 2014-09-05T09:15:00  
 Spectrometer Frequency 400.13  
 Spectral Width 8223.7  
 Lowest Frequency -1644.1  
 Nucleus 1H  
 Acquired Size 32768  
 Spectral Size 65536

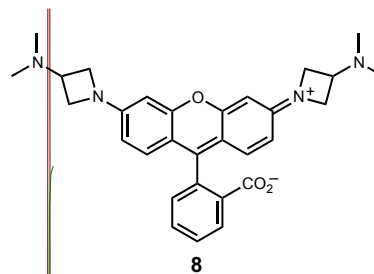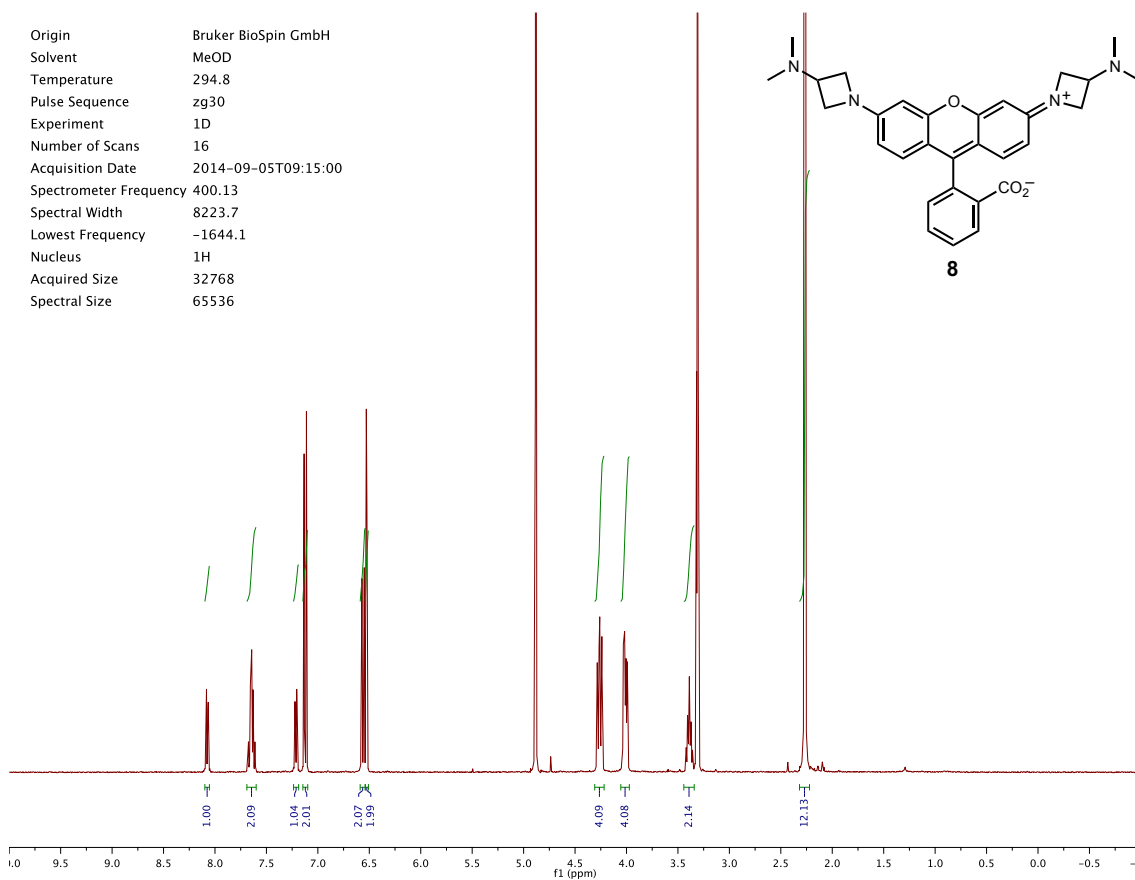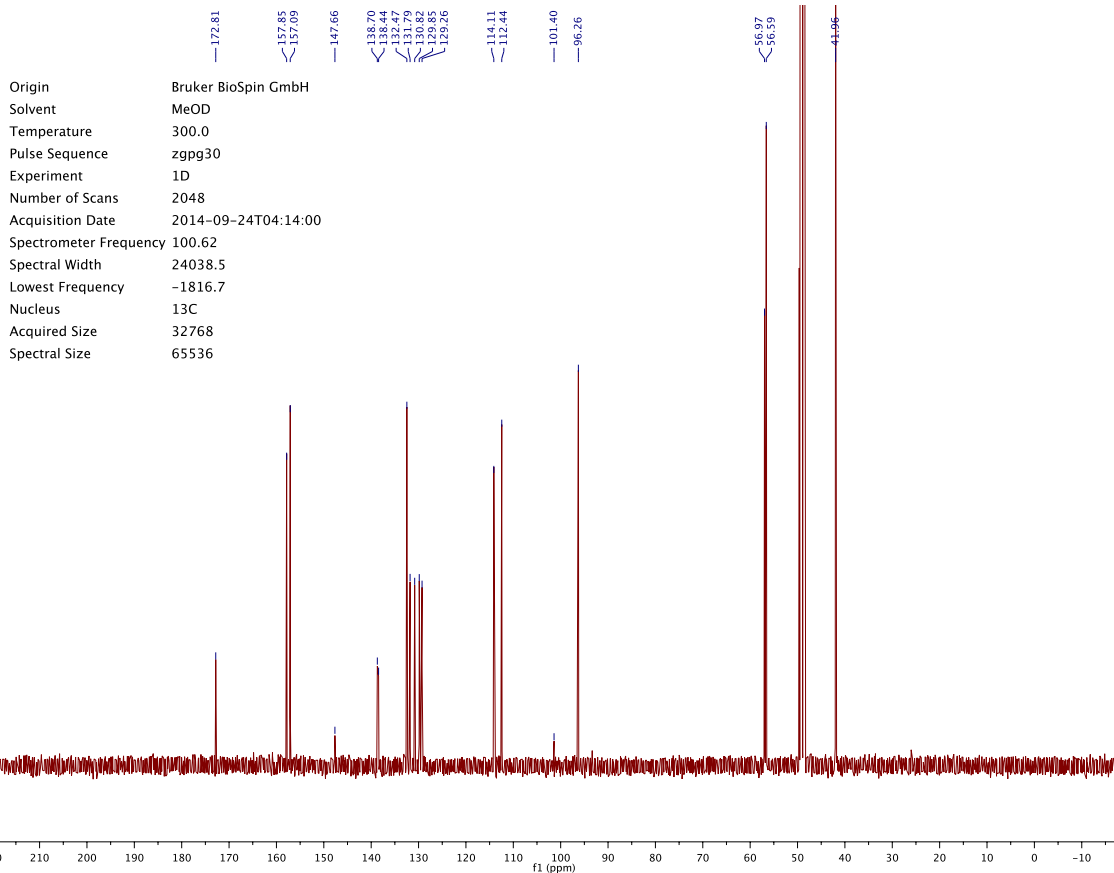

Origin Bruker BioSpin GmbH  
 Solvent MeOD  
 Temperature 300.0  
 Pulse Sequence zgpg30  
 Experiment 1D  
 Number of Scans 2048  
 Acquisition Date 2014-09-24T04:14:00  
 Spectrometer Frequency 100.62  
 Spectral Width 24038.5  
 Lowest Frequency -1816.7  
 Nucleus 13C  
 Acquired Size 32768  
 Spectral Size 65536

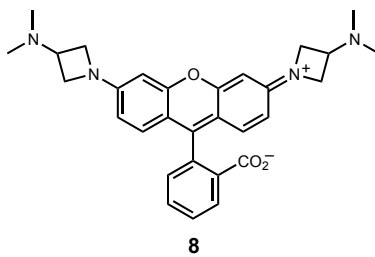

DAD1 C, Sig=550,8 Ref=off (2014\_09DAILYSEQUENCE\_LC 2014-09-04 16-25-43\2014\_07000002.D)

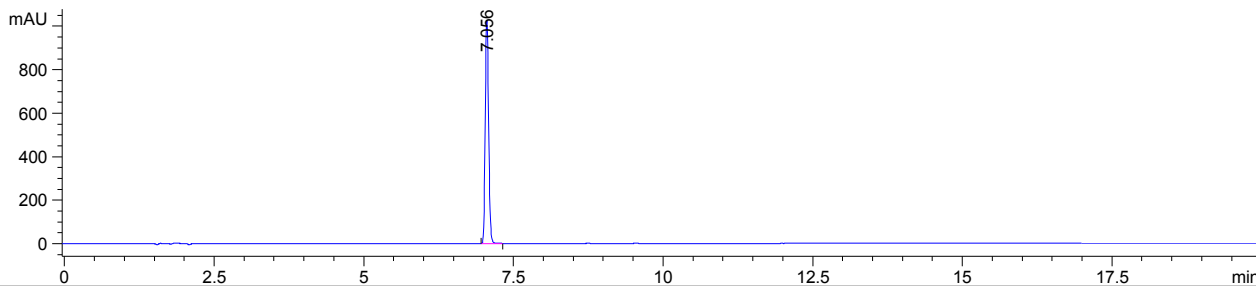

\*MSD1 SPC, time=7.057:7.130 of C:\CHEM321\DATA\2014\_09DAILYSEQUENCE\_LC 2014-09-04 16-25-43\2014\_07000002.D ES-API,

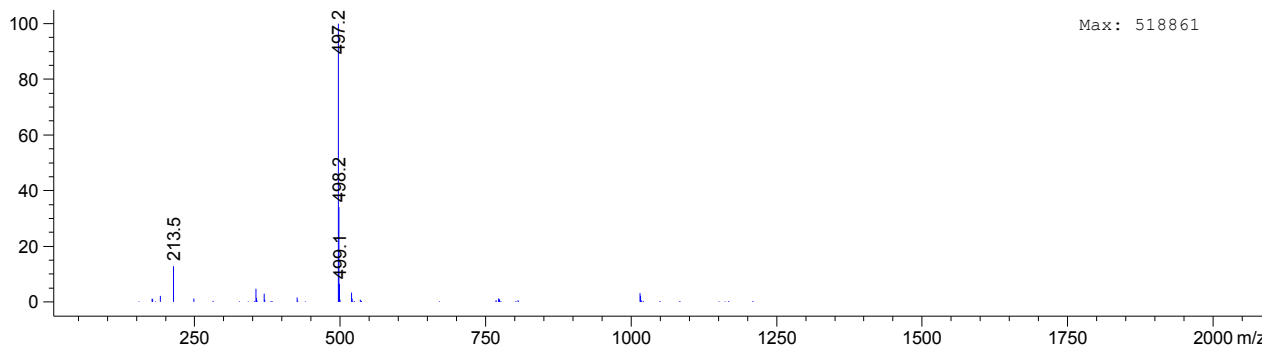

Origin Bruker BioSpin GmbH  
 Solvent DMSO  
 Temperature 300.0  
 Pulse Sequence zg30  
 Experiment 1D  
 Number of Scans 16  
 Acquisition Date 2014-10-07T09:01:00  
 Spectrometer Frequency 400.13  
 Spectral Width 8223.7  
 Lowest Frequency -1638.5  
 Nucleus 1H  
 Acquired Size 32768  
 Spectral Size 65536

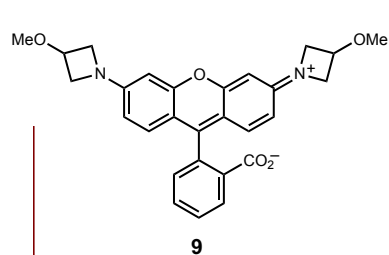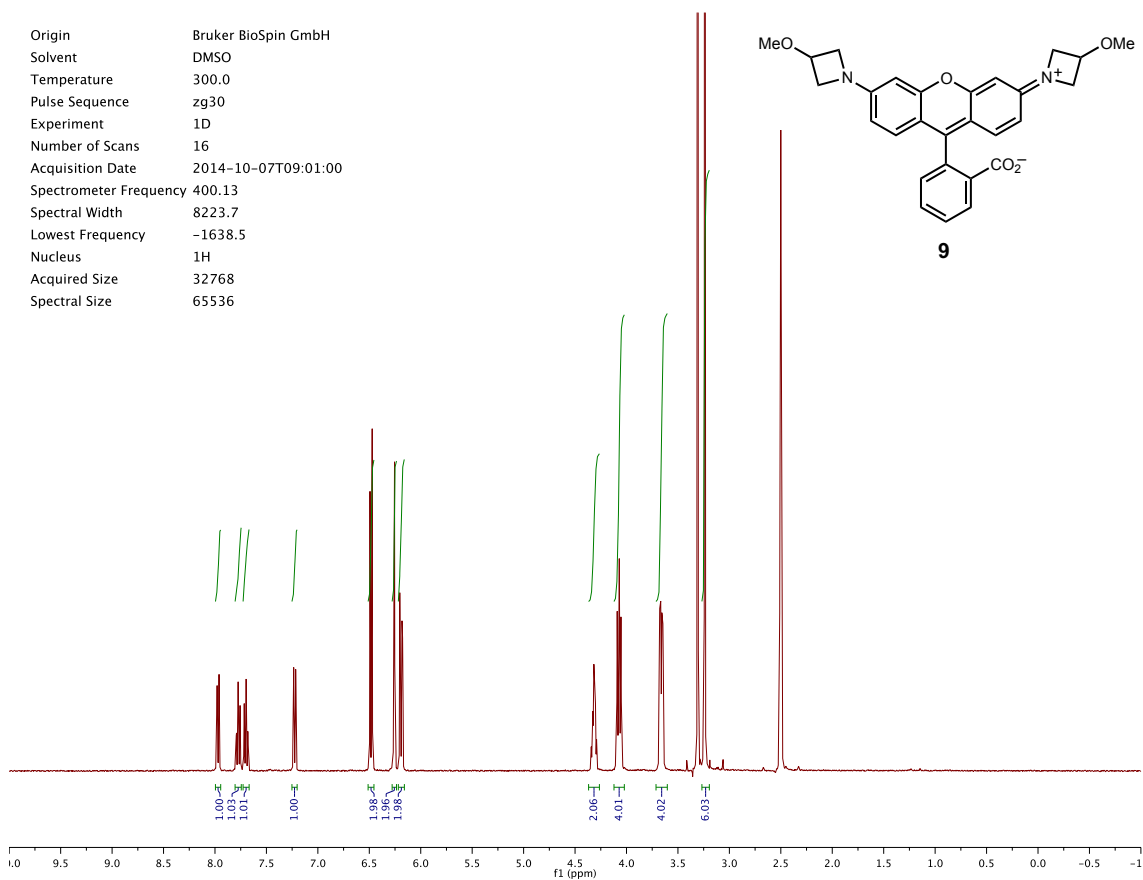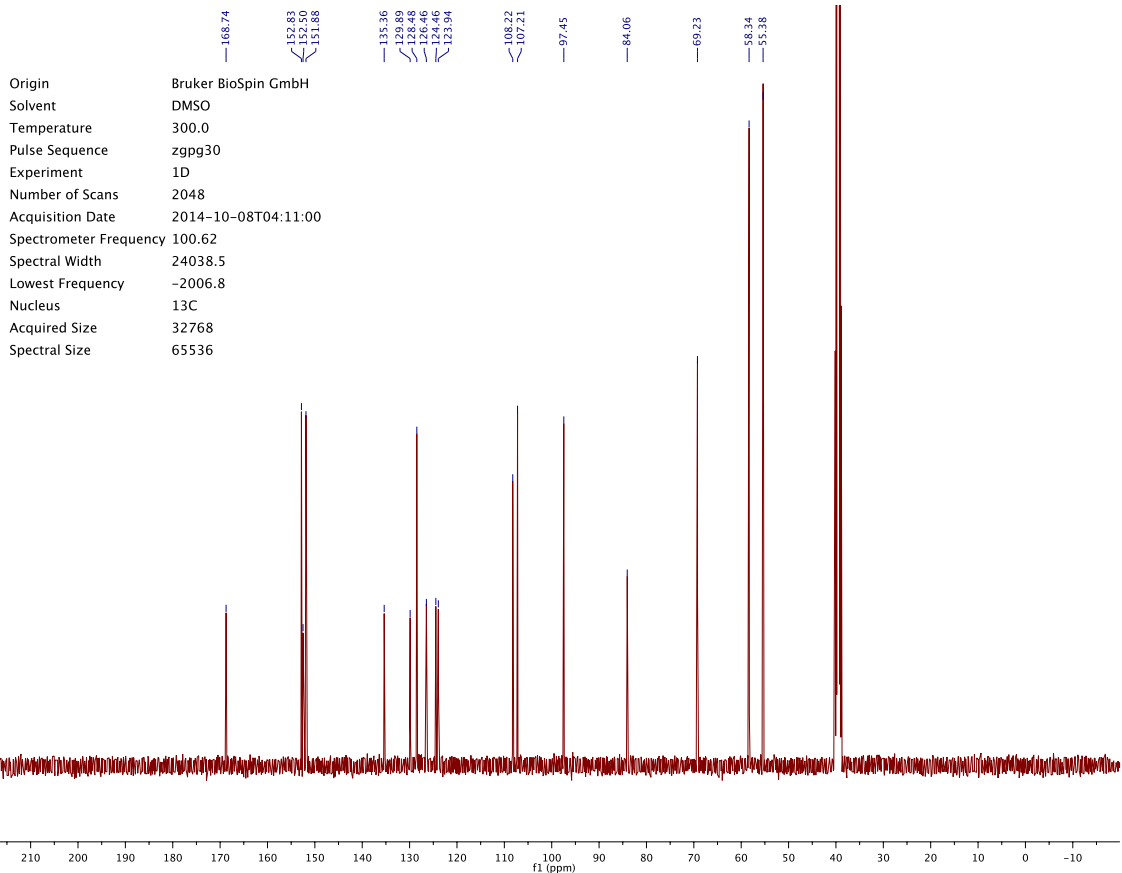

Origin Bruker BioSpin GmbH  
 Solvent DMSO  
 Temperature 300.0  
 Pulse Sequence zgpg30  
 Experiment 1D  
 Number of Scans 2048  
 Acquisition Date 2014-10-08T04:11:00  
 Spectrometer Frequency 100.62  
 Spectral Width 24038.5  
 Lowest Frequency -2006.8  
 Nucleus 13C  
 Acquired Size 32768  
 Spectral Size 65536

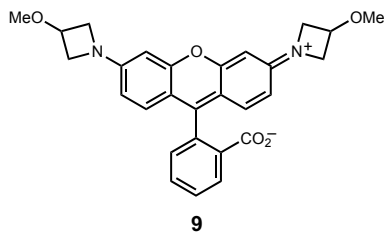

DAD1 C, Sig=550,8 Ref=off (2014\_09\DAIILYSQUENCE\_LC 2014-09-23 16-12-07\2014\_07000002.D)

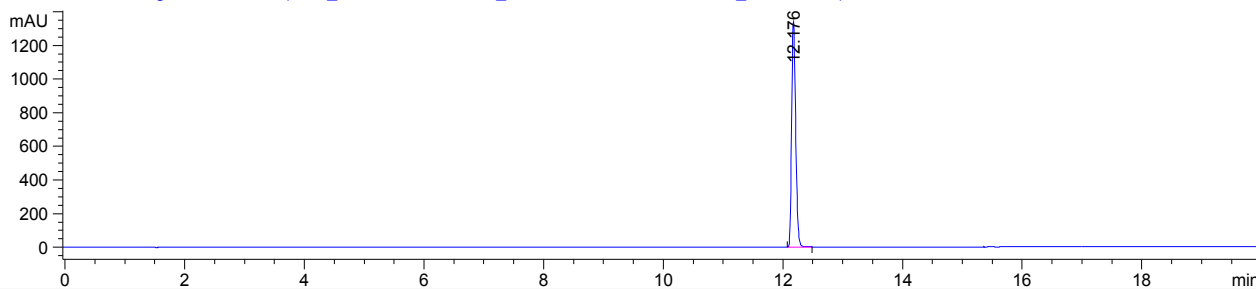

\*MSD1 SPC, time=12.170:12.262 of C:\CHEM32\1\DATA\2014\_09\DAIILYSQUENCE\_LC 2014-09-23 16-12-07\2014\_07000002.D ES-API

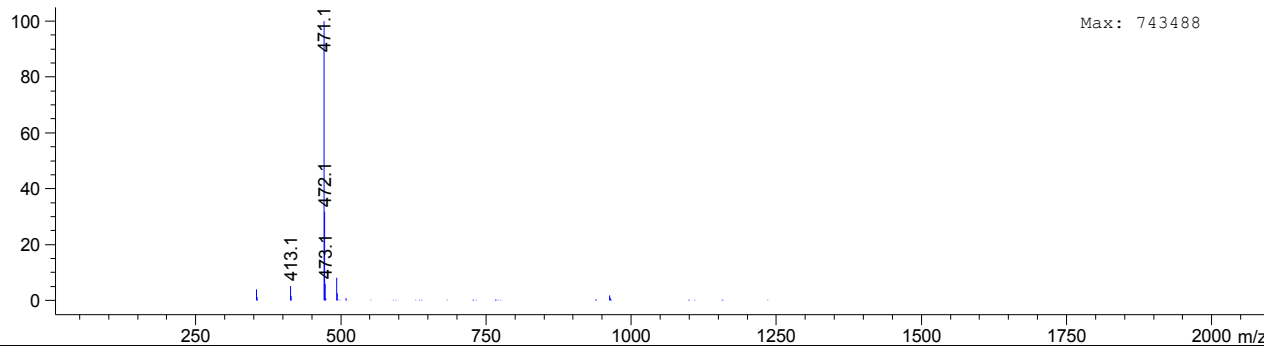



Origin Bruker BioSpin GmbH  
 Solvent DMSO  
 Temperature 300.0  
 Pulse Sequence zg30  
 Experiment 1D  
 Number of Scans 16  
 Acquisition Date 2014-10-09T10:02:00  
 Spectrometer Frequency 400.13  
 Spectral Width 8223.7  
 Lowest Frequency -1638.5  
 Nucleus 1H  
 Acquired Size 32768  
 Spectral Size 65536

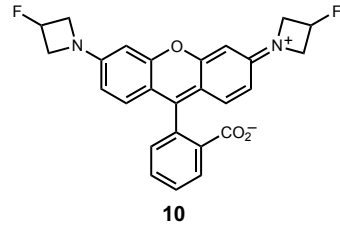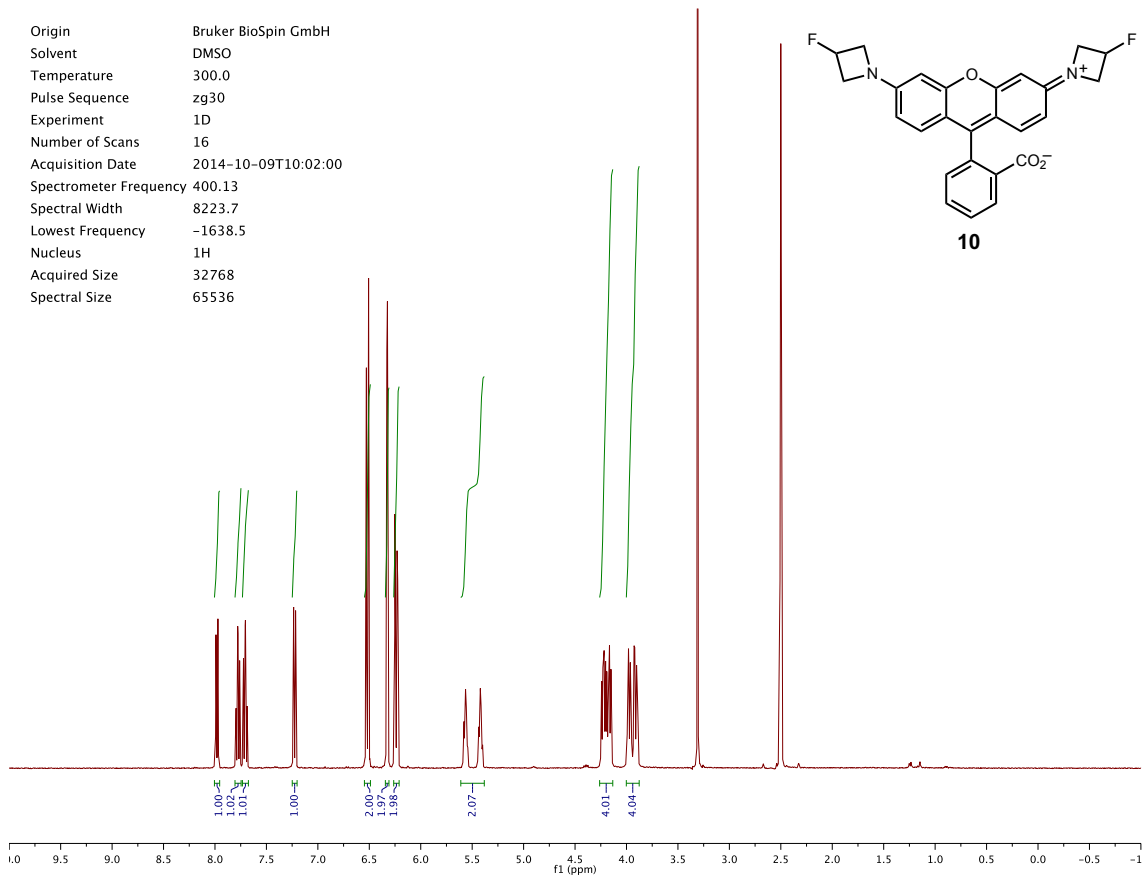

Origin Bruker BioSpin GmbH  
 Solvent DMSO  
 Temperature 300.0  
 Pulse Sequence zgpg30  
 Experiment 1D  
 Number of Scans 2048  
 Acquisition Date 2014-10-10T04:37:00  
 Spectrometer Frequency 100.62  
 Spectral Width 24038.5  
 Lowest Frequency -2006.9  
 Nucleus 13C  
 Acquired Size 32768  
 Spectral Size 65536

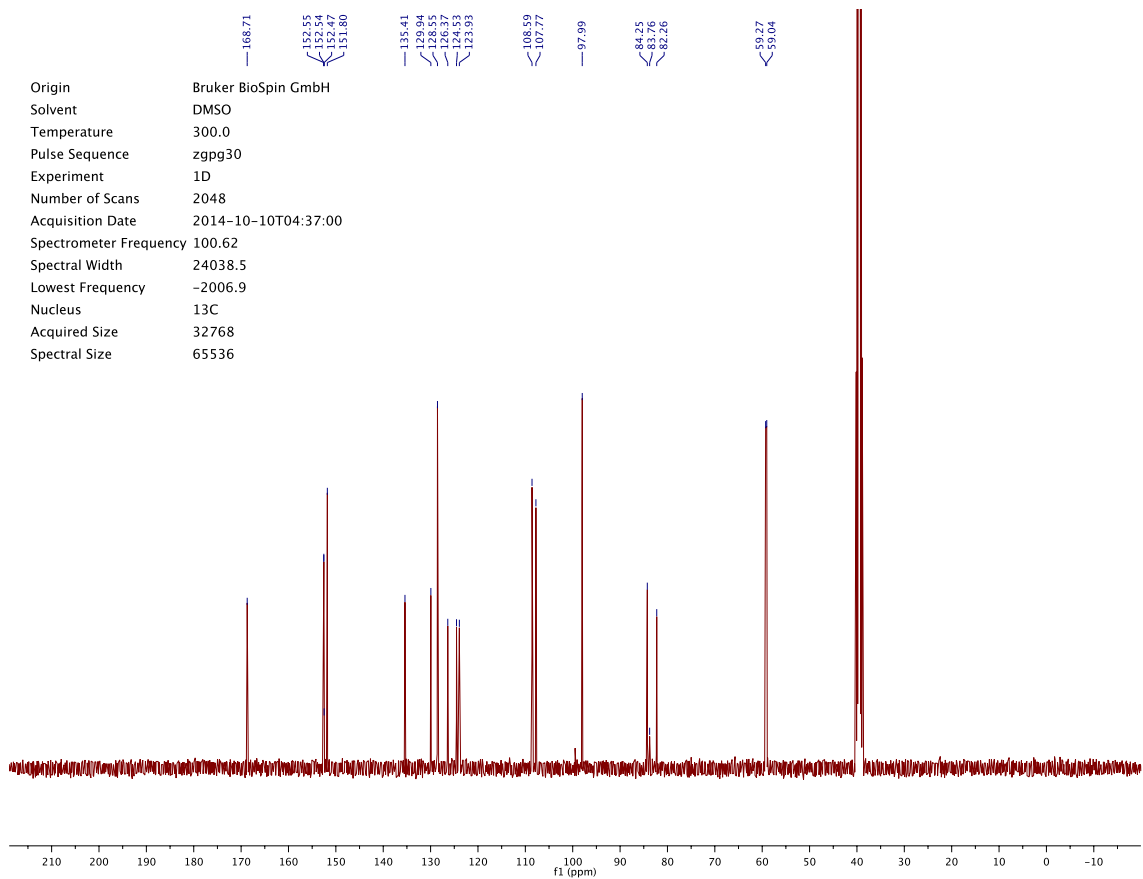

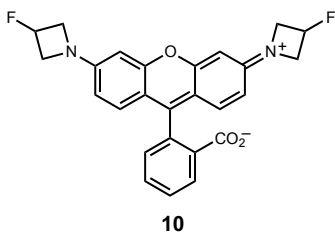

DAD1 C, Sig=550,8 Ref=off (2014\_09\DAILYSEQUENCE\_LC 2014-09-24 13-29-05\2014\_07000002.D)

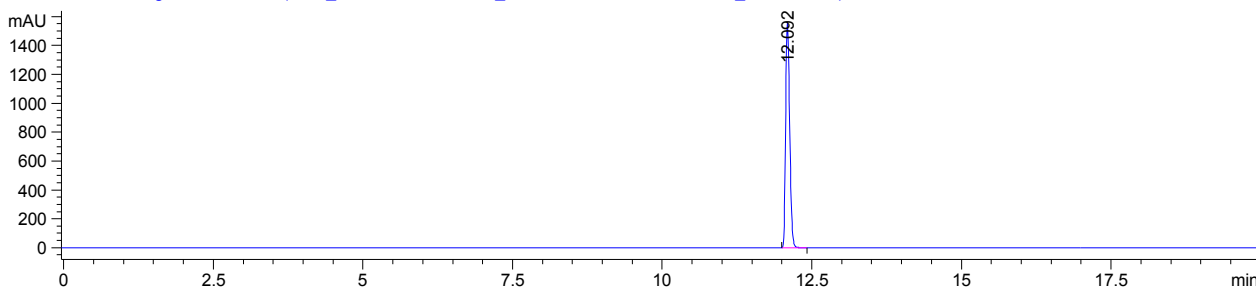

\*MSD1 SPC, time=12.078:12.189 of C:\CHEM321\DATA\2014\_09\DAILYSEQUENCE\_LC 2014-09-24 13-29-05\2014\_07000002.D ES-API

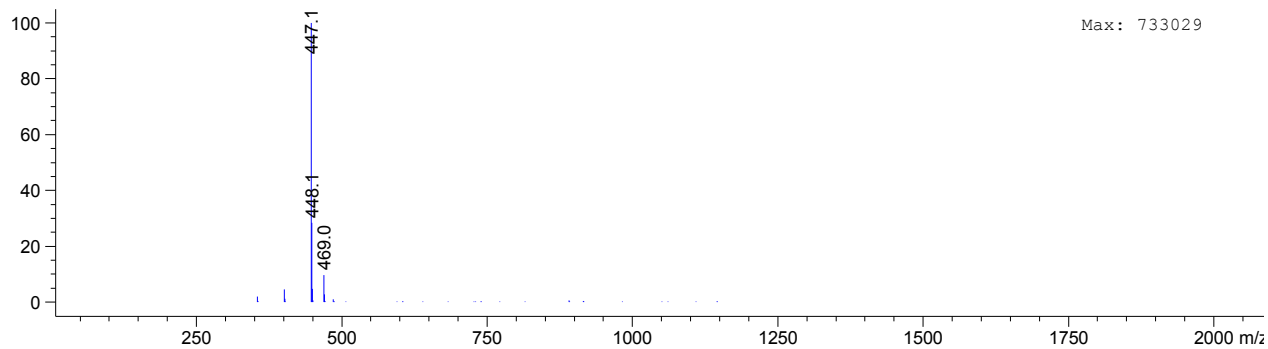

Origin Bruker BioSpin GmbH  
 Solvent CDCl3  
 Temperature 300.0  
 Pulse Sequence zg30  
 Experiment 1D  
 Number of Scans 16  
 Acquisition Date 2014-09-24T17:01:00  
 Spectrometer Frequency 400.13  
 Spectral Width 8223.7  
 Lowest Frequency -1646.7  
 Nucleus 1H  
 Acquired Size 32768  
 Spectral Size 65536

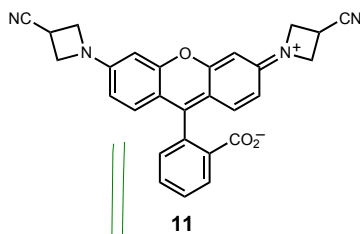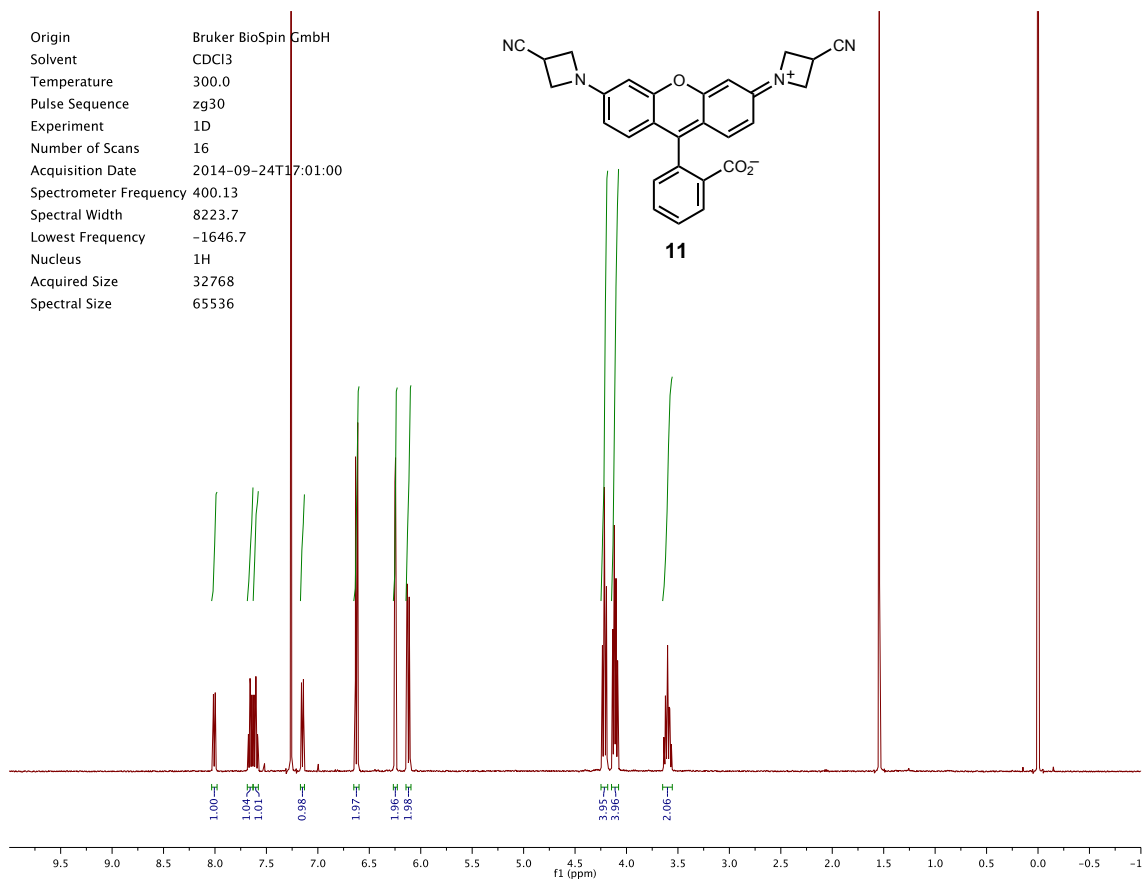

Origin Bruker BioSpin GmbH  
 Solvent CDCl3  
 Temperature 300.0  
 Pulse Sequence zgpg30  
 Experiment 1D  
 Number of Scans 2048  
 Acquisition Date 2014-09-25T04:15:00  
 Spectrometer Frequency 100.62  
 Spectral Width 24038.5  
 Lowest Frequency -1945.9  
 Nucleus 13C  
 Acquired Size 32768  
 Spectral Size 65536

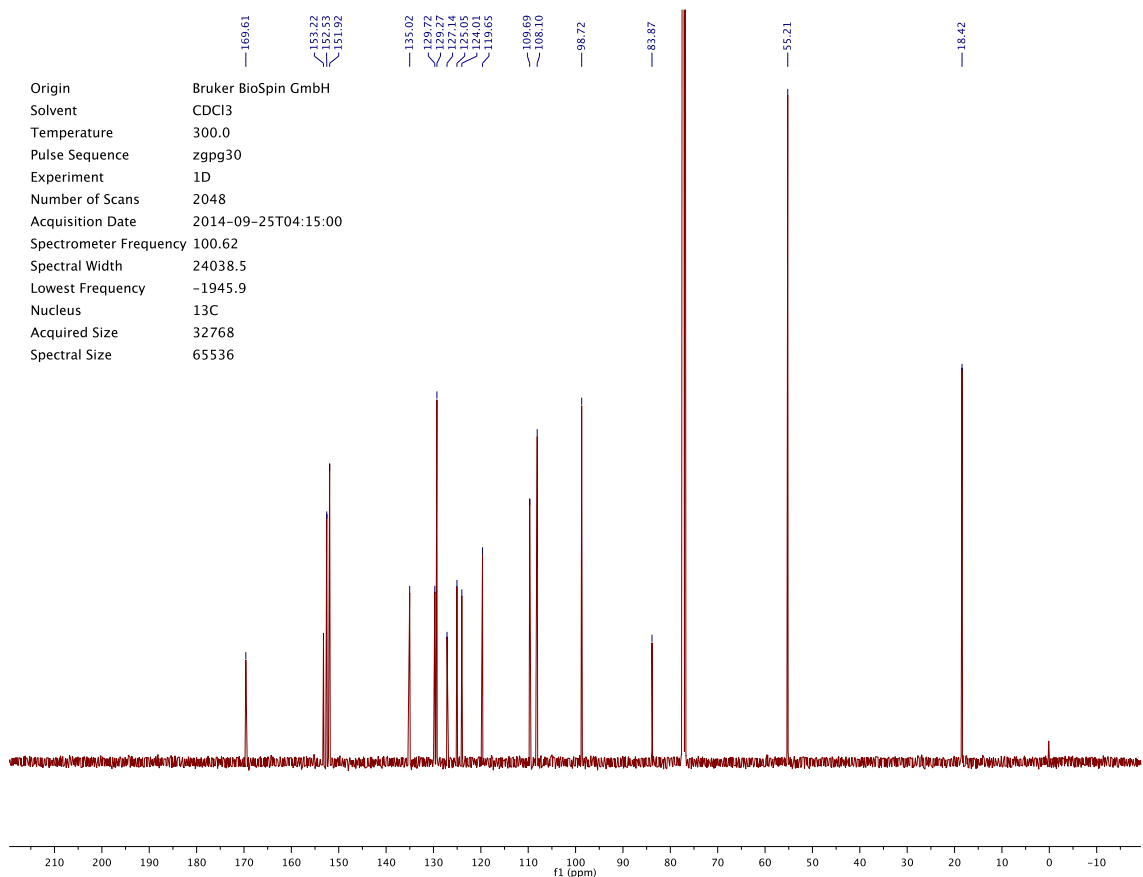

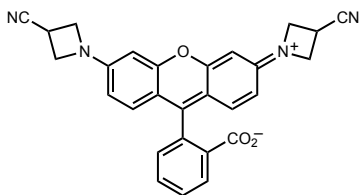

11

DAD1 C, Sig=550,8 Ref=off (2014\_09\DAILYSEQUENCE\_LC 2014-09-16 13-35-15\2014\_07000002.D)

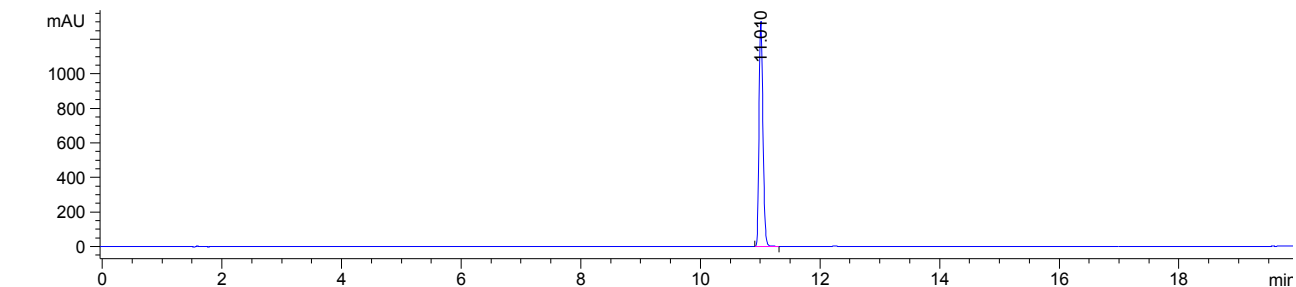

\*MSD1 SPC, time=11.006:11.099 of C:\CHEM32\1\DATA\2014\_09\DAILYSEQUENCE\_LC 2014-09-16 13-35-15\2014\_07000002.D ES-API

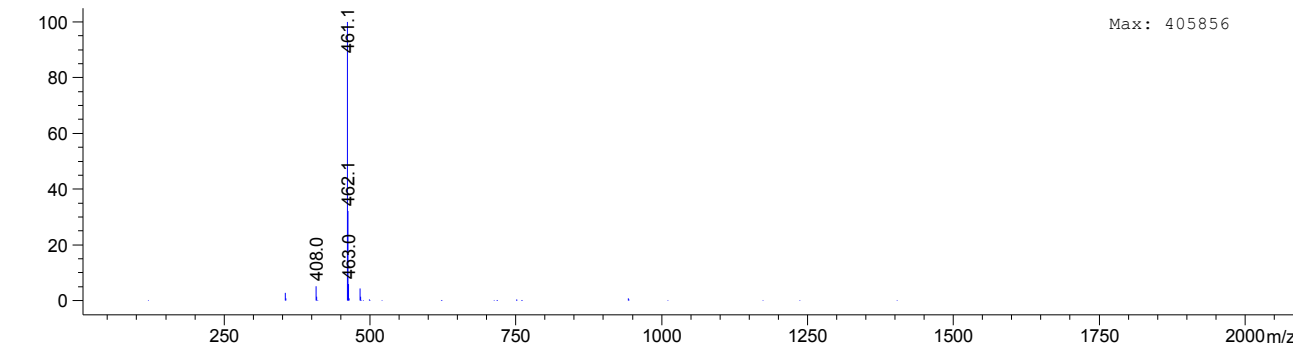

Origin Bruker BioSpin GmbH  
 Solvent CDCl3  
 Temperature 300.0  
 Pulse Sequence zg30  
 Experiment 1D  
 Number of Scans 16  
 Acquisition Date 2014-09-24T16:50:00  
 Spectrometer Frequency 400.13  
 Spectral Width 8223.7  
 Lowest Frequency -1646.9  
 Nucleus 1H  
 Acquired Size 32768  
 Spectral Size 65536

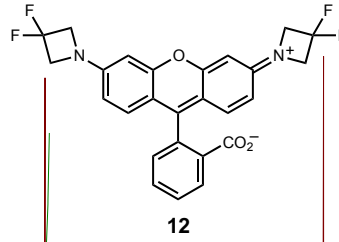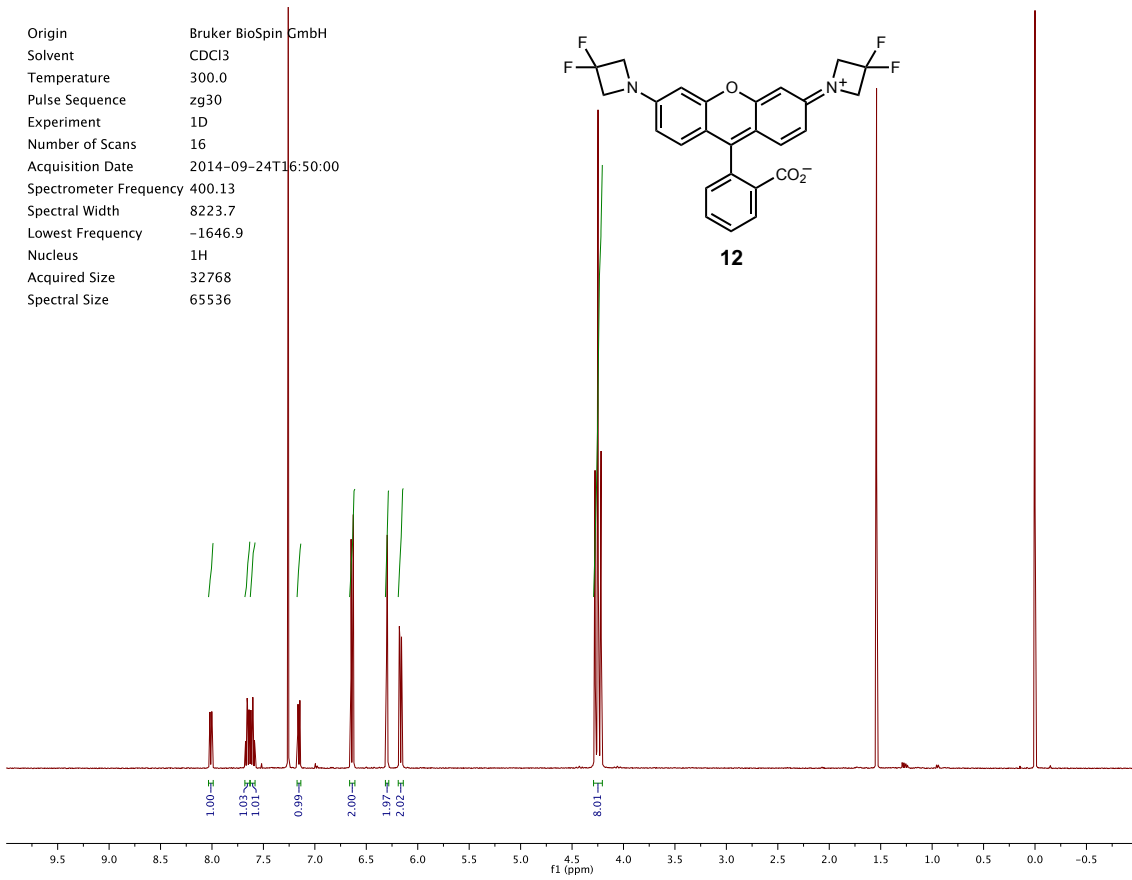

Origin Bruker BioSpin GmbH  
 Solvent CDCl3  
 Temperature 300.0  
 Pulse Sequence zgpg30  
 Experiment 1D  
 Number of Scans 2048  
 Acquisition Date 2014-09-24T23:03:00  
 Spectrometer Frequency 100.62  
 Spectral Width 24038.5  
 Lowest Frequency -1943.8  
 Nucleus 13C  
 Acquired Size 32768  
 Spectral Size 65536

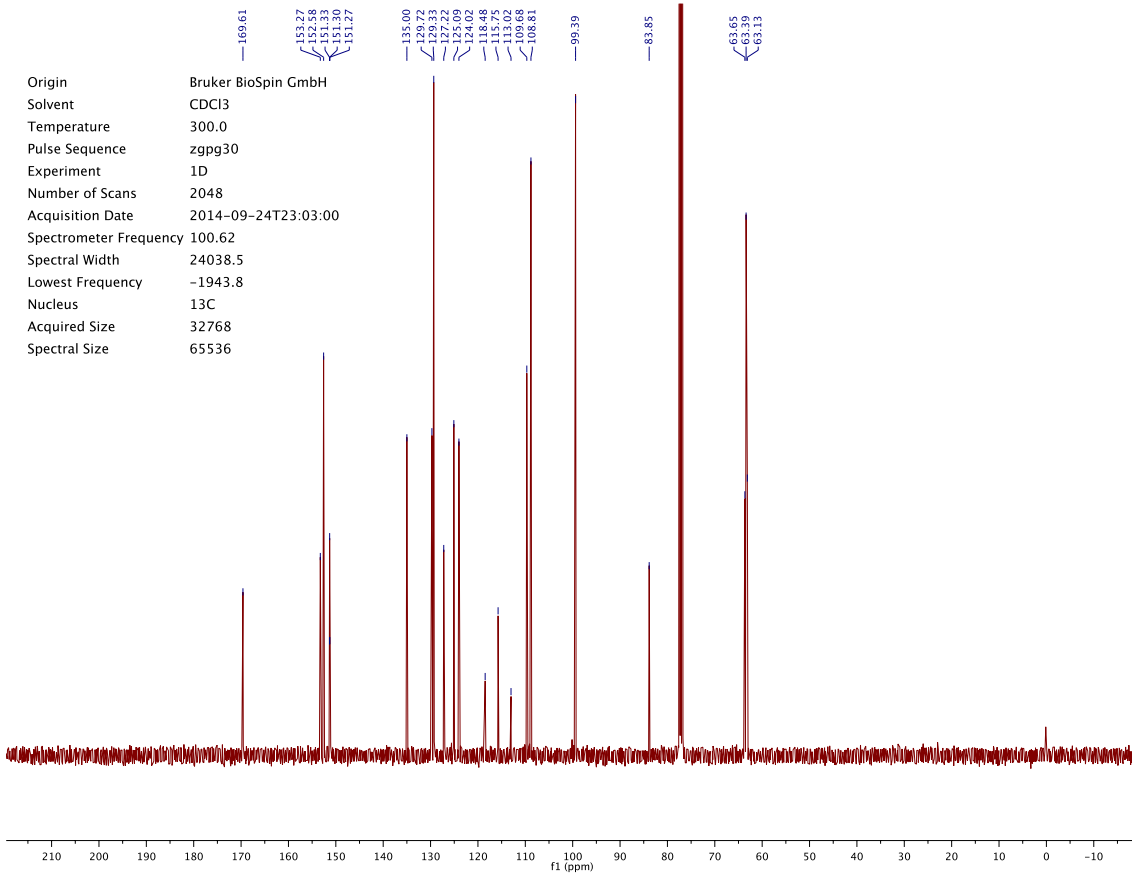

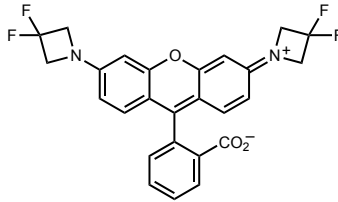

12

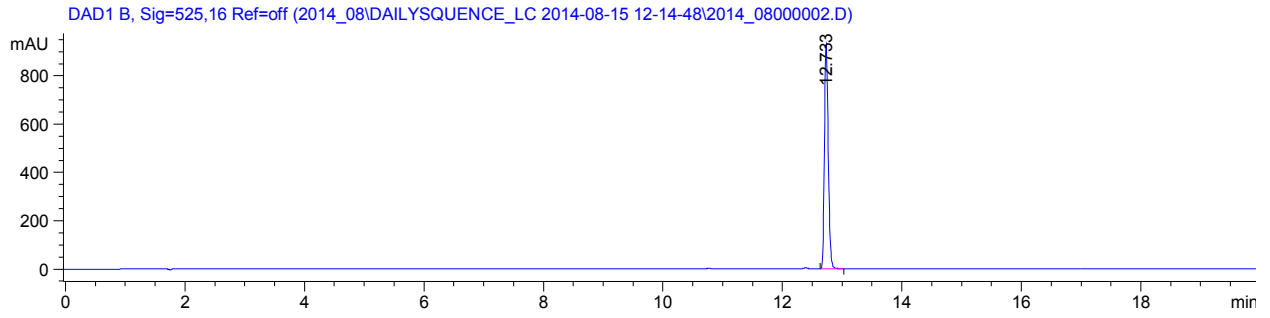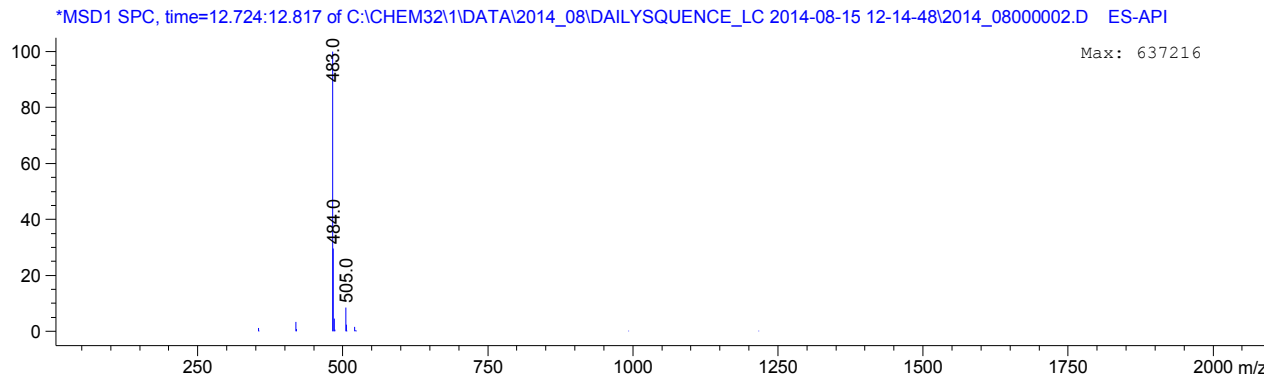

Origin Bruker BioSpin GmbH  
 Solvent CDCl3  
 Temperature 300.0  
 Pulse Sequence zg30  
 Experiment 1D  
 Number of Scans 16  
 Acquisition Date 2015-03-16T13:02:00  
 Modification Date 2015-03-16T13:02:44  
 Spectrometer Frequency 400.13  
 Spectral Width 8223.7  
 Lowest Frequency -1617.3  
 Nucleus 1H  
 Acquired Size 32768  
 Spectral Size 65536

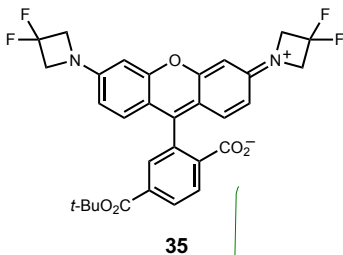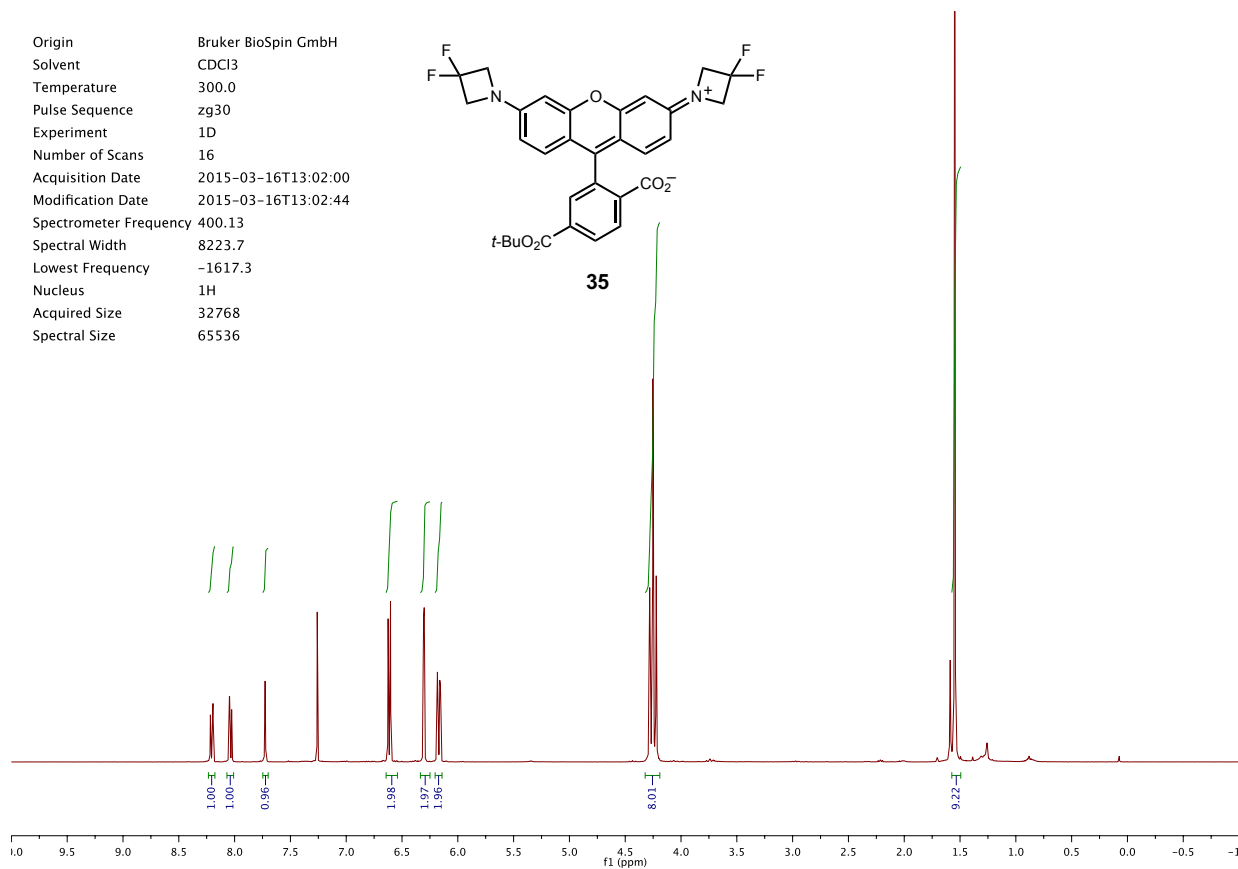

Origin Bruker BioSpin GmbH  
 Solvent CDCl3  
 Temperature 300.0  
 Pulse Sequence zgpg30  
 Experiment 1D  
 Number of Scans 1024  
 Acquisition Date 2015-03-16T14:03:00  
 Modification Date 2015-03-16T14:03:38  
 Spectrometer Frequency 100.62  
 Spectral Width 24038.5  
 Lowest Frequency -1677.2  
 Nucleus 13C  
 Acquired Size 32768  
 Spectral Size 65536

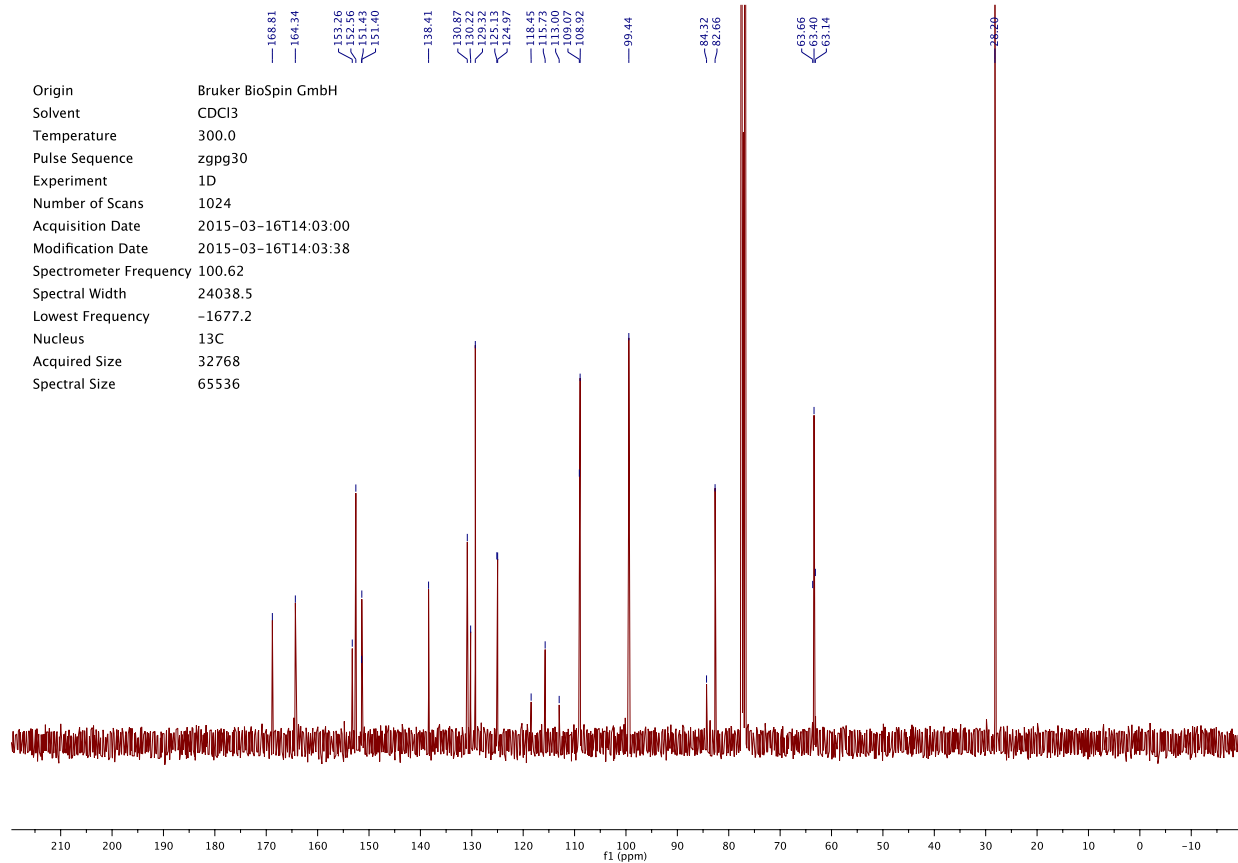

Origin Bruker BioSpin GmbH  
 Solvent MeOD  
 Temperature 300.0  
 Pulse Sequence zg30  
 Experiment 1D  
 Number of Scans 16  
 Acquisition Date 2016-09-27T09:32:00  
 Modification Date 2016-09-27T09:32:59  
 Spectrometer Frequency 400.13  
 Spectral Width 8012.8  
 Lowest Frequency -1543.3  
 Nucleus 1H  
 Acquired Size 32768  
 Spectral Size 65536

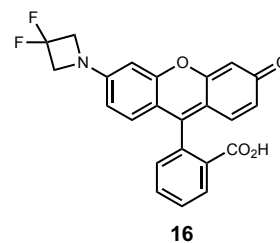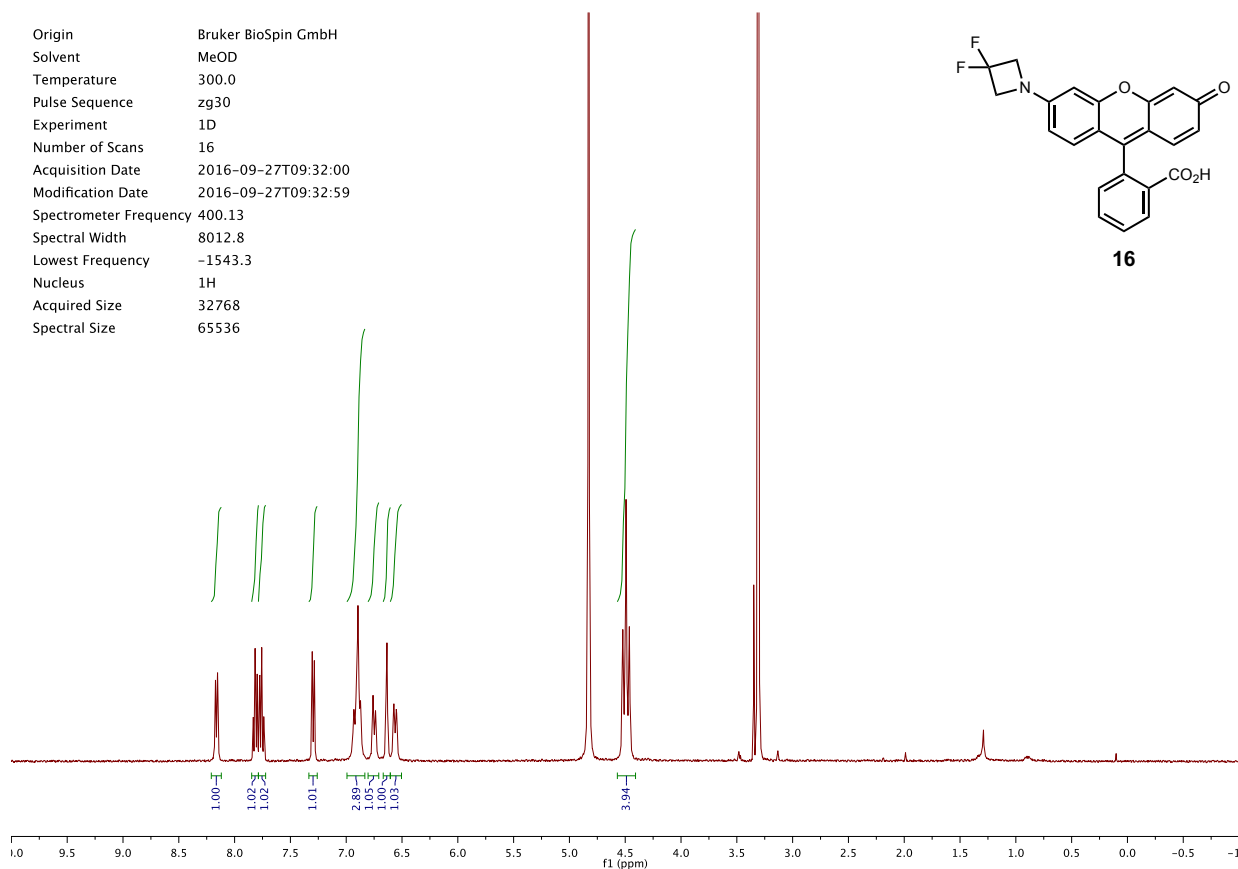

Origin Bruker BioSpin GmbH  
 Solvent DMSO  
 Temperature 350.0  
 Pulse Sequence zgpg30  
 Experiment 1D  
 Number of Scans 4096  
 Acquisition Date 2016-10-05T20:43:00  
 Modification Date 2016-10-05T20:43:12  
 Spectrometer Frequency 100.62  
 Spectral Width 24038.5  
 Lowest Frequency -1958.4  
 Nucleus 13C  
 Acquired Size 32768  
 Spectral Size 65536

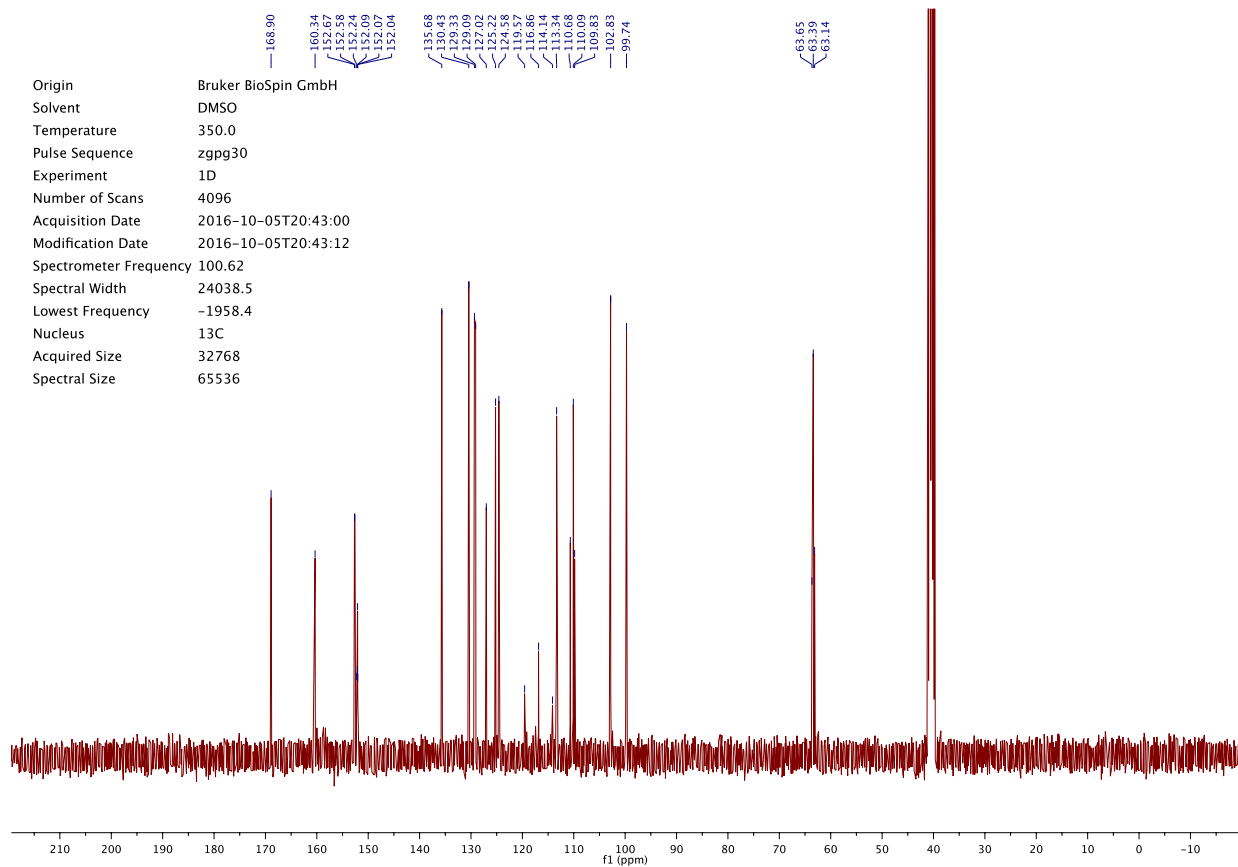



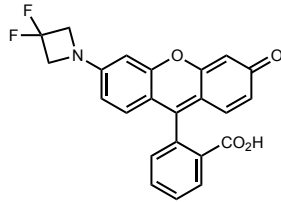

16

DAD1 B, Sig=500,4 Ref=off (2016\_09\DAILY\_SEQUENCE\_LC 2016-09-26 15-54-30\2016\_090000001.D)

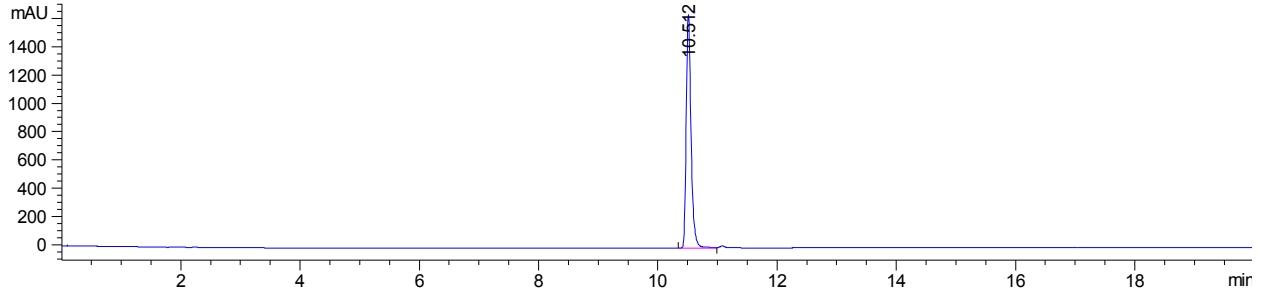

\*MSD2 SPC, time=10.520:10.629 of C:\CHEM32\1\DATA\2016\_09\DAILY\_SEQUENCE\_LC 2016-09-26 15-54-30\2016\_090000001.D ES-

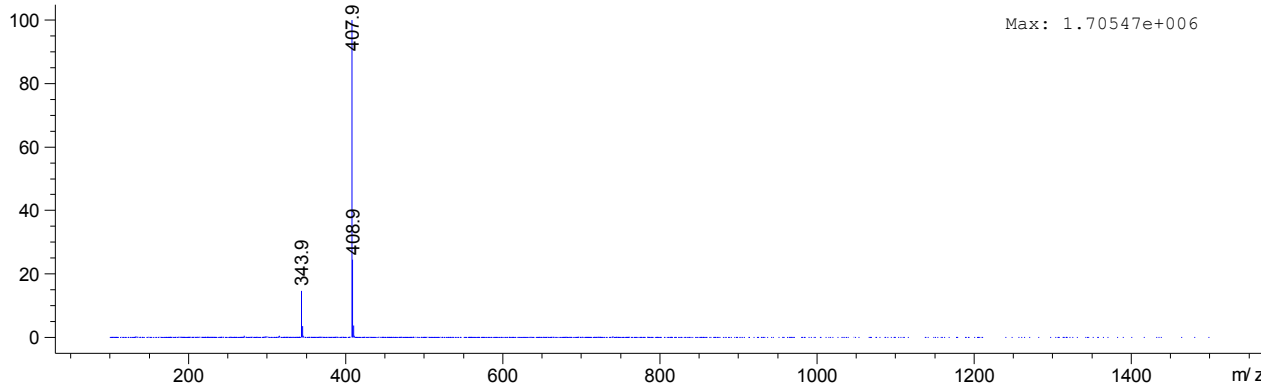

Origin Bruker BioSpin GmbH  
 Solvent CDCl3  
 Temperature 295.6  
 Pulse Sequence zg30  
 Experiment 1D  
 Number of Scans 16  
 Acquisition Date 2016-09-26T11:39:00  
 Modification Date 2016-09-26T11:39:15  
 Spectrometer Frequency 400.13  
 Spectral Width 8012.8  
 Lowest Frequency -1545.1  
 Nucleus 1H  
 Acquired Size 32768  
 Spectral Size 65536

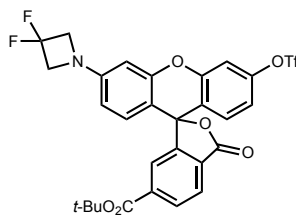

39

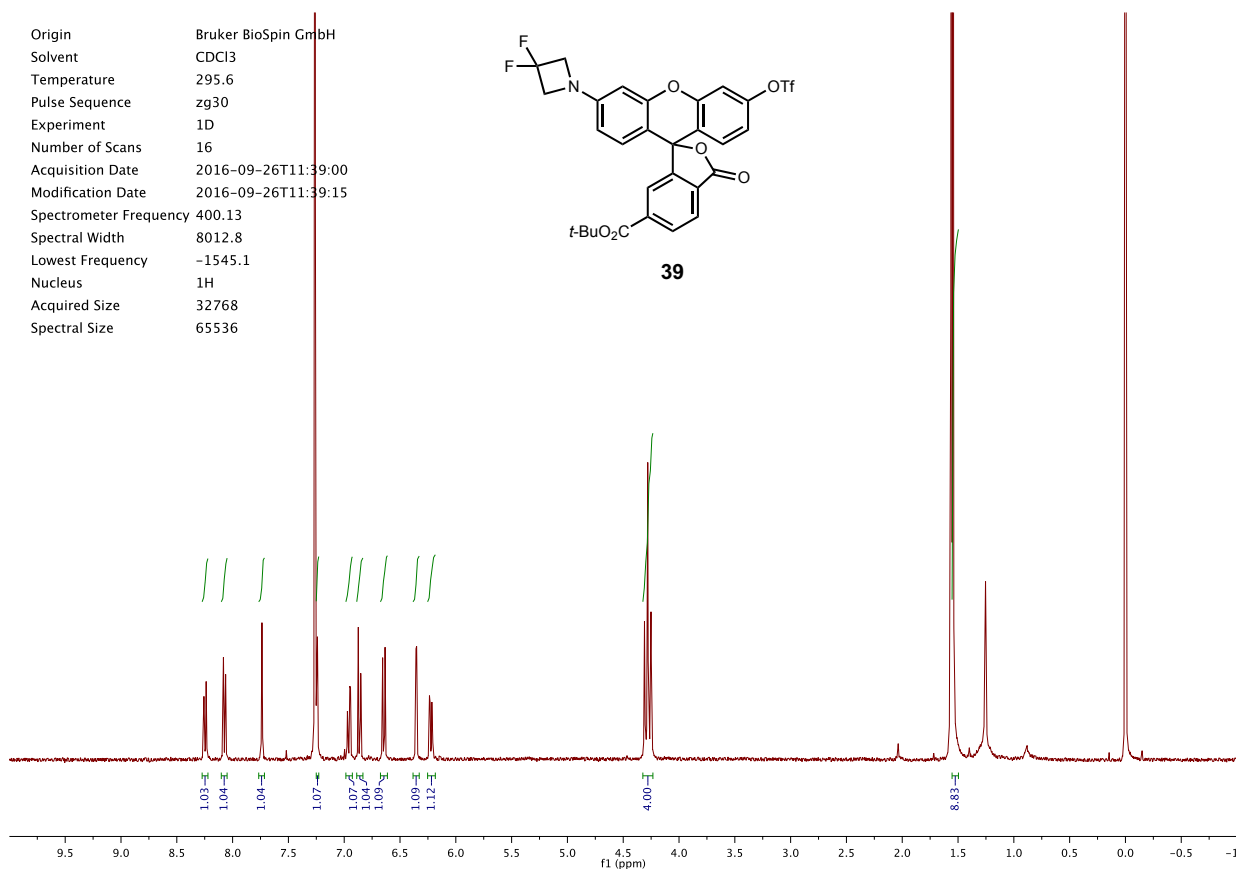

Origin Bruker BioSpin GmbH  
 Solvent CDCl3  
 Temperature 296.3  
 Pulse Sequence zgpg30  
 Experiment 1D  
 Number of Scans 4096  
 Acquisition Date 2016-09-22T01:03:00  
 Modification Date 2016-09-22T01:03:01  
 Spectrometer Frequency 100.62  
 Spectral Width 24038.5  
 Lowest Frequency -1945.1  
 Nucleus 13C  
 Acquired Size 32768  
 Spectral Size 65536

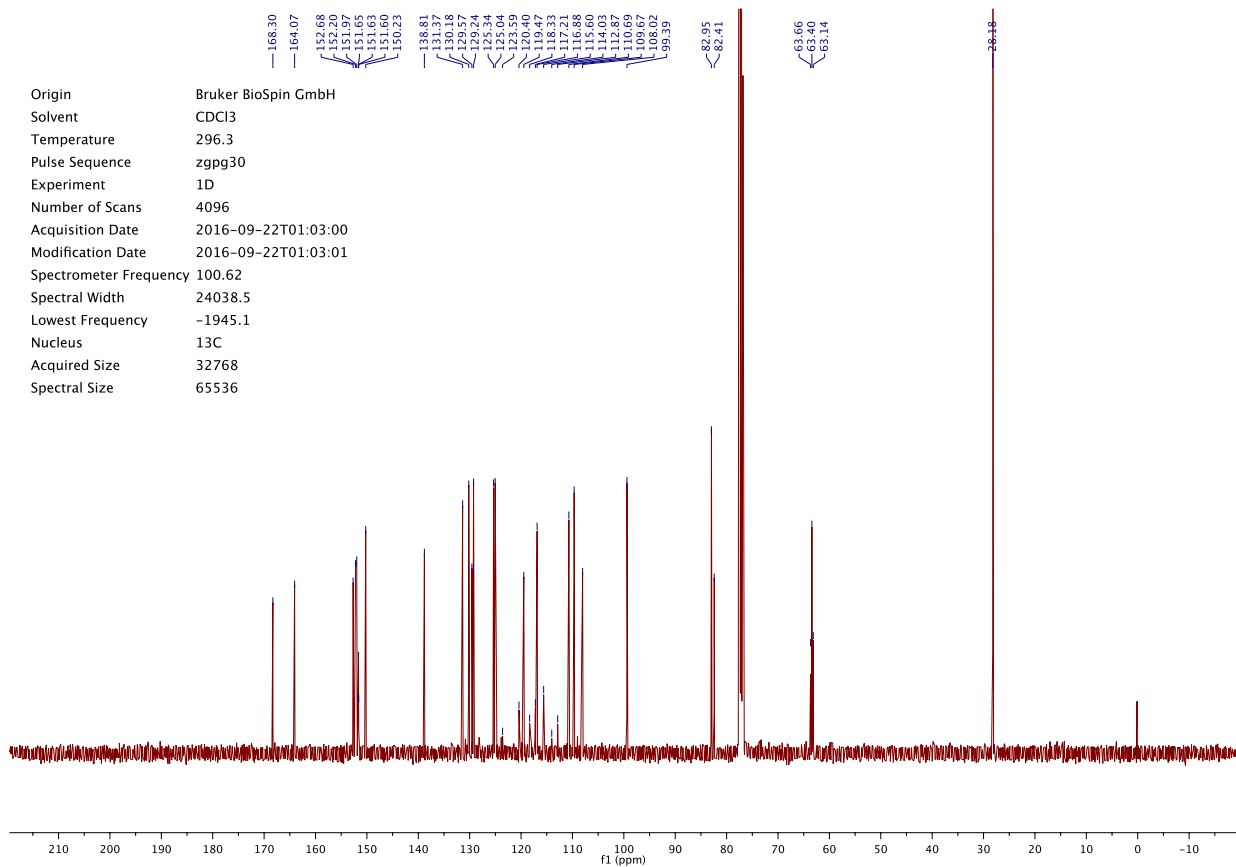

Origin Bruker BioSpin GmbH  
 Solvent CDCl3  
 Temperature 300.0  
 Pulse Sequence zg30  
 Experiment 1D  
 Number of Scans 16  
 Acquisition Date 2014-11-19T09:16:00  
 Spectrometer Frequency 400.13  
 Spectral Width 8223.7  
 Lowest Frequency -1647.7  
 Nucleus 1H  
 Acquired Size 32768  
 Spectral Size 65536

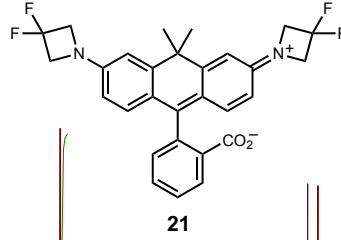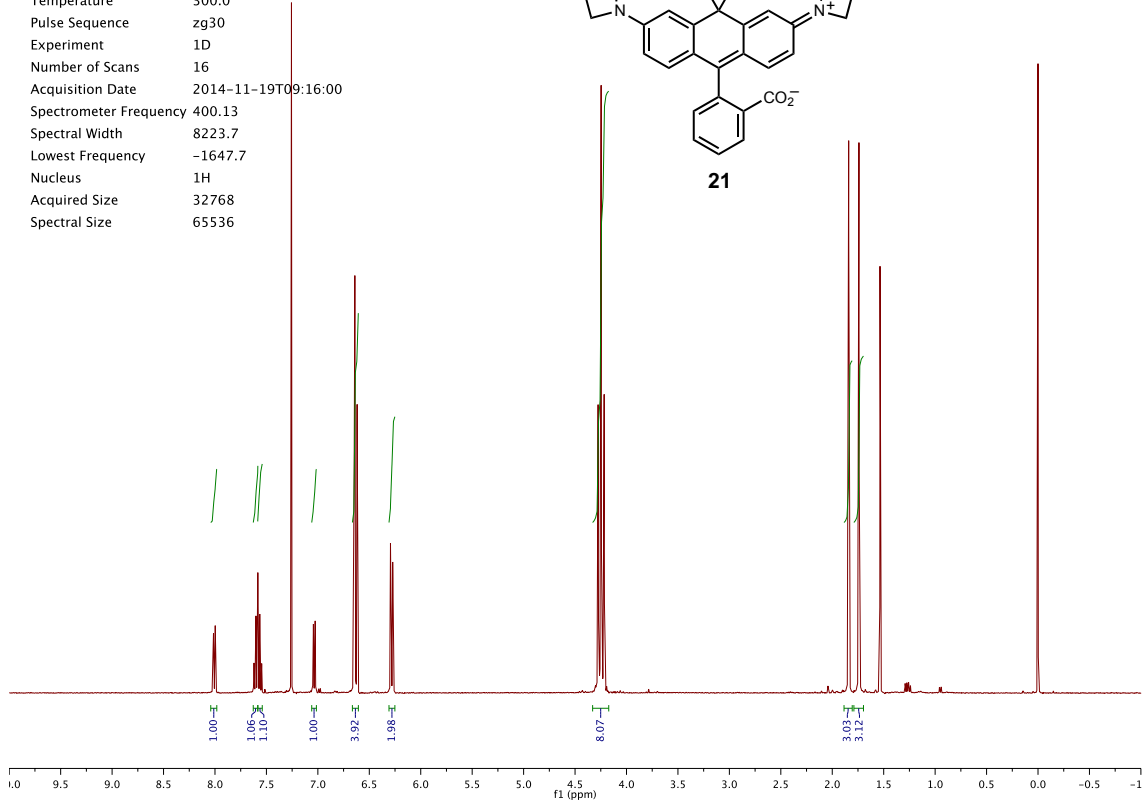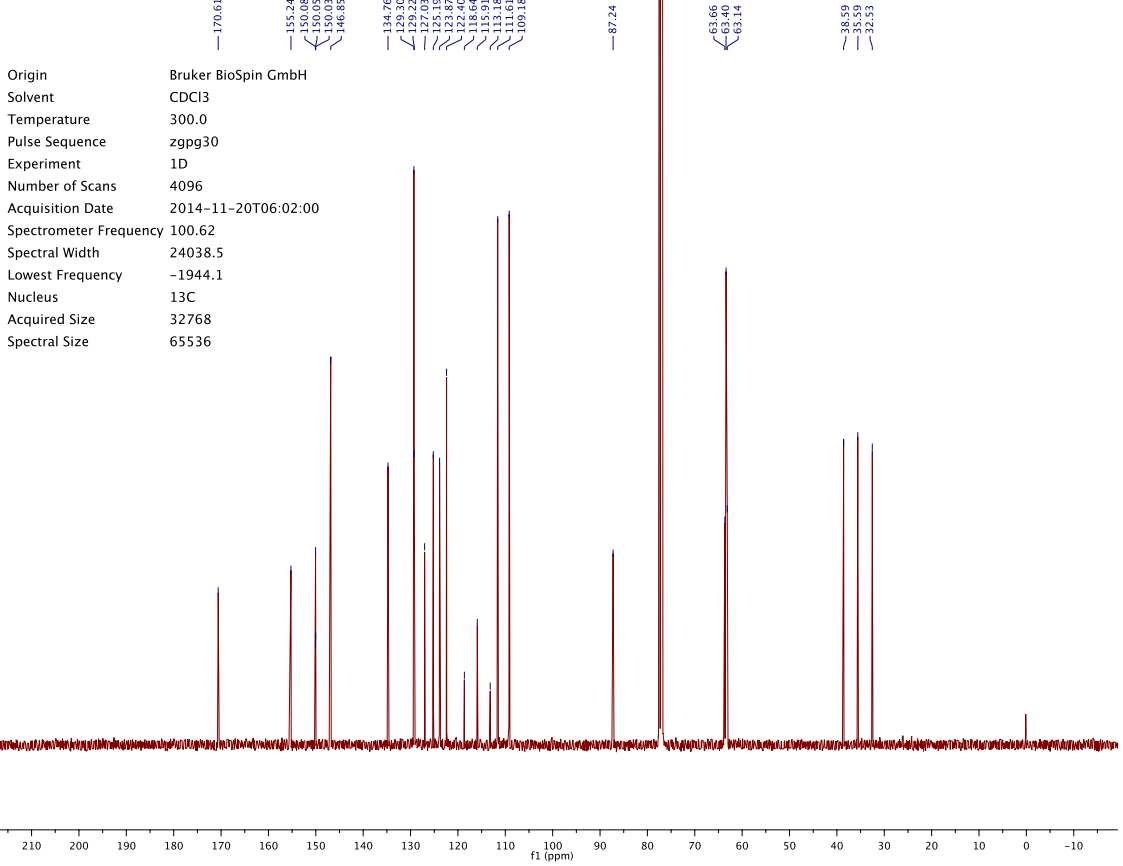

Origin Bruker BioSpin GmbH  
 Solvent CDCl3  
 Temperature 300.0  
 Pulse Sequence zgpg30  
 Experiment 1D  
 Number of Scans 4096  
 Acquisition Date 2014-11-20T06:02:00  
 Spectrometer Frequency 100.62  
 Spectral Width 24038.5  
 Lowest Frequency -1944.1  
 Nucleus 13C  
 Acquired Size 32768  
 Spectral Size 65536

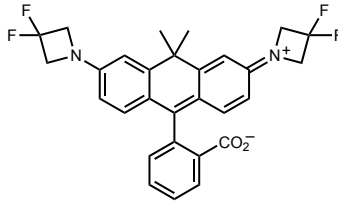

21

DAD1 D, Sig=600,8 Ref=off (2014\_11DAILYSEQUENCE\_LC 2014-11-18 16-18-05/2014\_11000002.D)

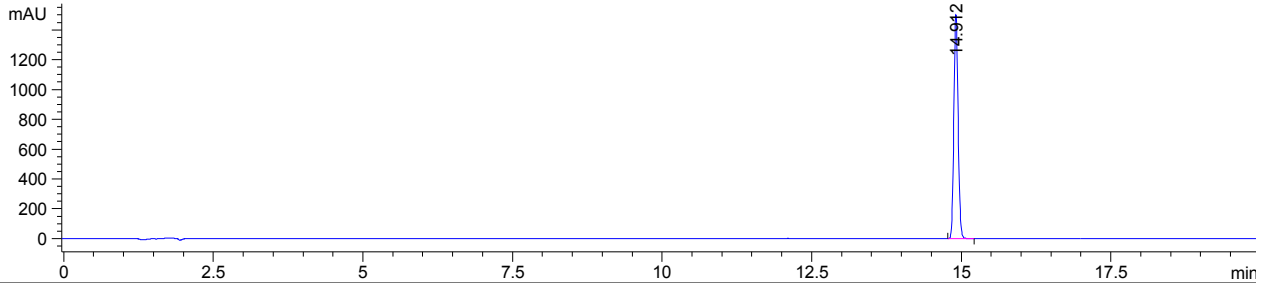

\*MSD1 SPC, time=14.890:15.001 of C:\CHEM321\DATA\2014\_11DAILYSEQUENCE\_LC 2014-11-18 16-18-05/2014\_11000002.D ES-API

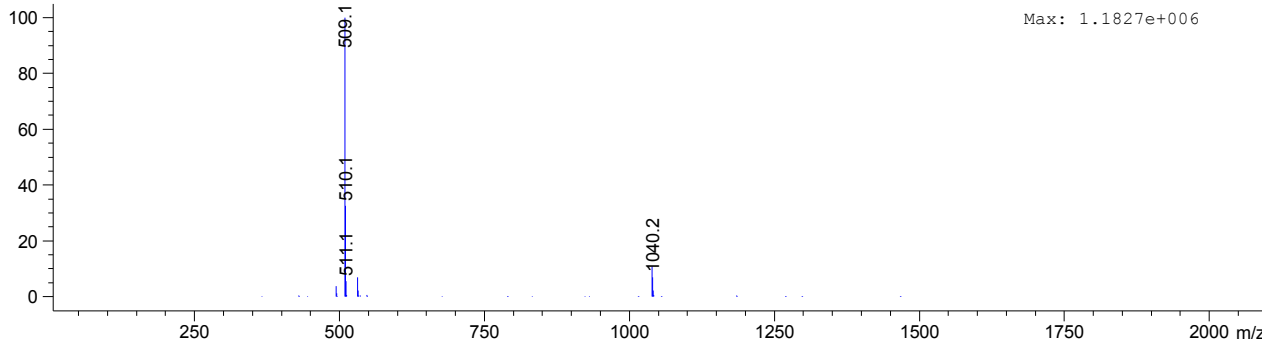

Origin Bruker BioSpin GmbH  
 Solvent CDCl3  
 Temperature 300.0  
 Pulse Sequence zg30  
 Experiment 1D  
 Number of Scans 16  
 Acquisition Date 2013-07-31T12:02:00  
 Spectrometer Frequency 400.13  
 Spectral Width 8223.7  
 Lowest Frequency -1646.8  
 Nucleus 1H  
 Acquired Size 32768  
 Spectral Size 65536

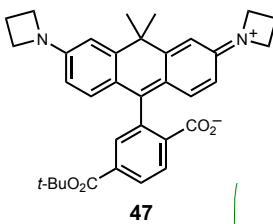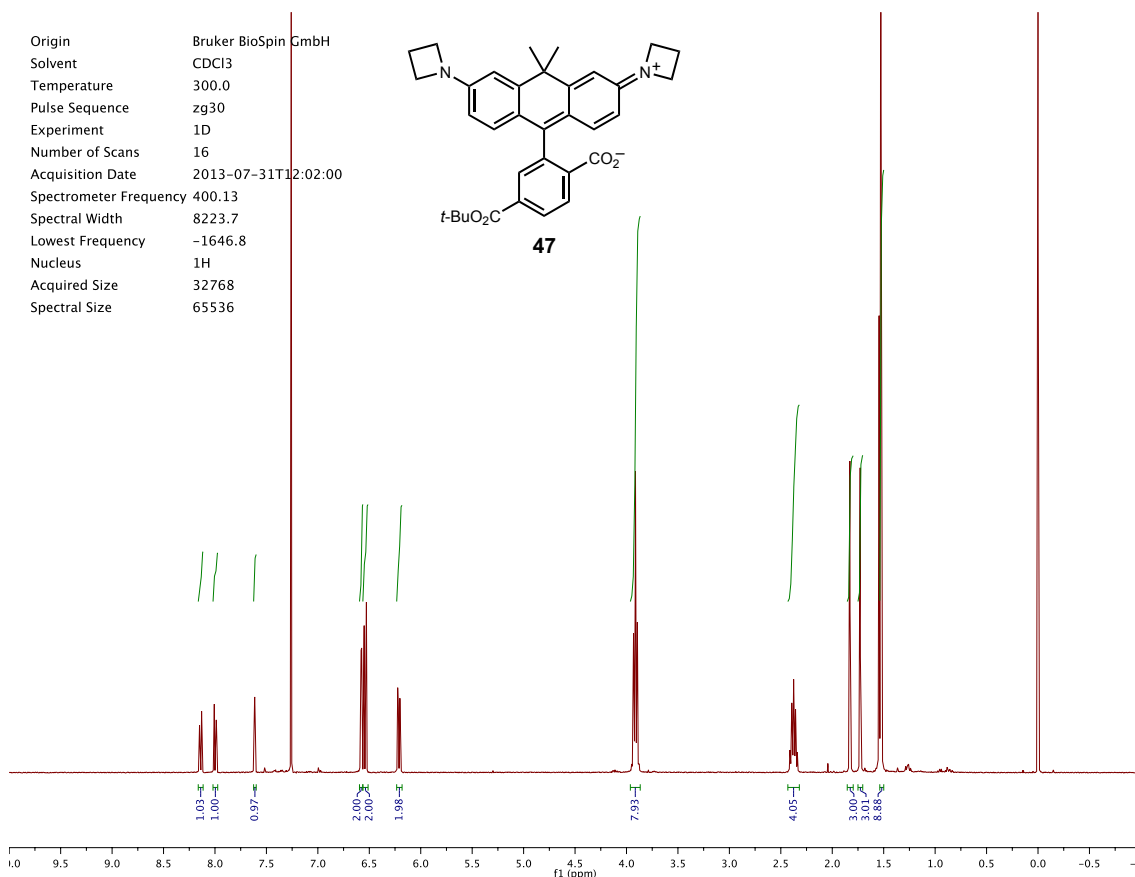

Origin Bruker BioSpin GmbH  
 Solvent CDCl3  
 Temperature 300.0  
 Pulse Sequence zgpg30  
 Experiment 1D  
 Number of Scans 1024  
 Acquisition Date 2013-08-01T03:20:00  
 Spectrometer Frequency 100.62  
 Spectral Width 24038.5  
 Lowest Frequency -1943.3  
 Nucleus 13C  
 Acquired Size 32768  
 Spectral Size 65536

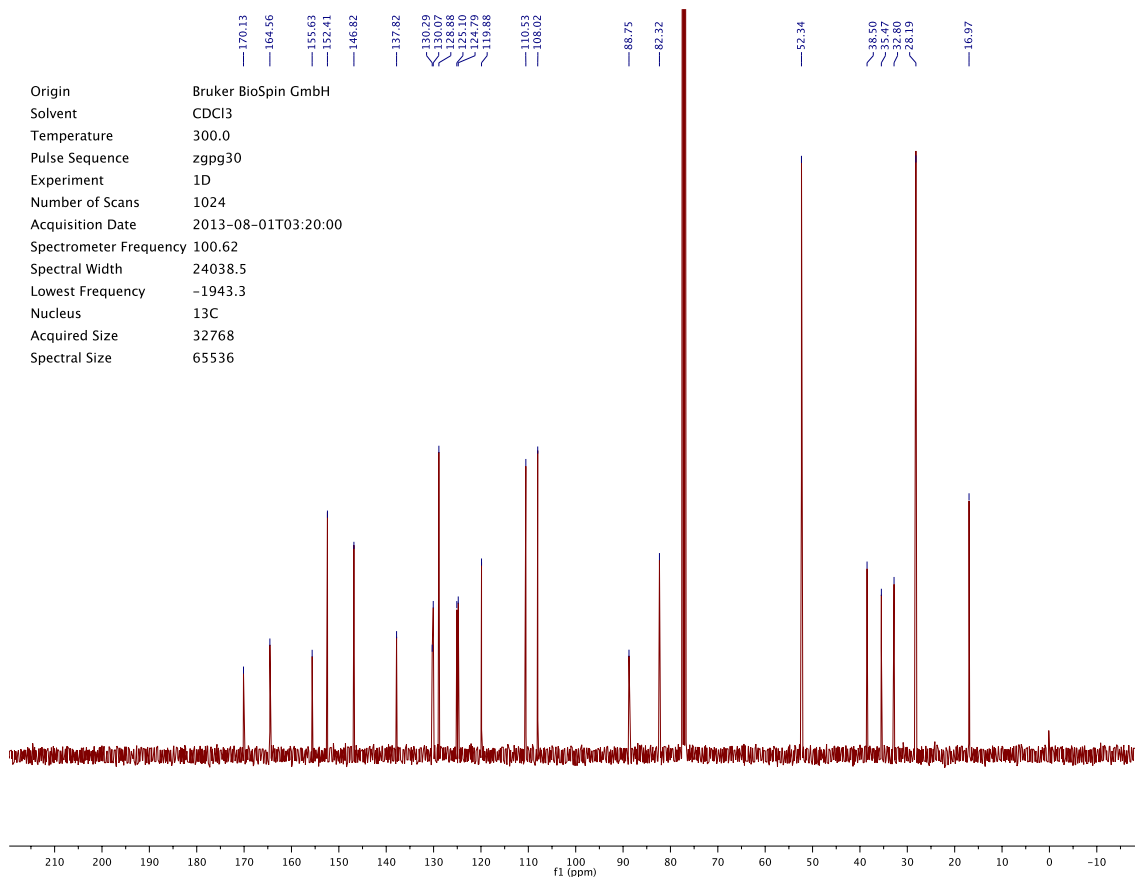

Origin Bruker BioSpin GmbH  
 Solvent CDCl3  
 Temperature 300.0  
 Pulse Sequence zg30  
 Experiment 1D  
 Number of Scans 16  
 Acquisition Date 2014-11-19T09:26:00  
 Spectrometer Frequency 400.13  
 Spectral Width 8223.7  
 Lowest Frequency -1647.4  
 Nucleus 1H  
 Acquired Size 32768  
 Spectral Size 65536

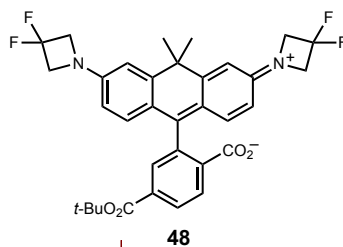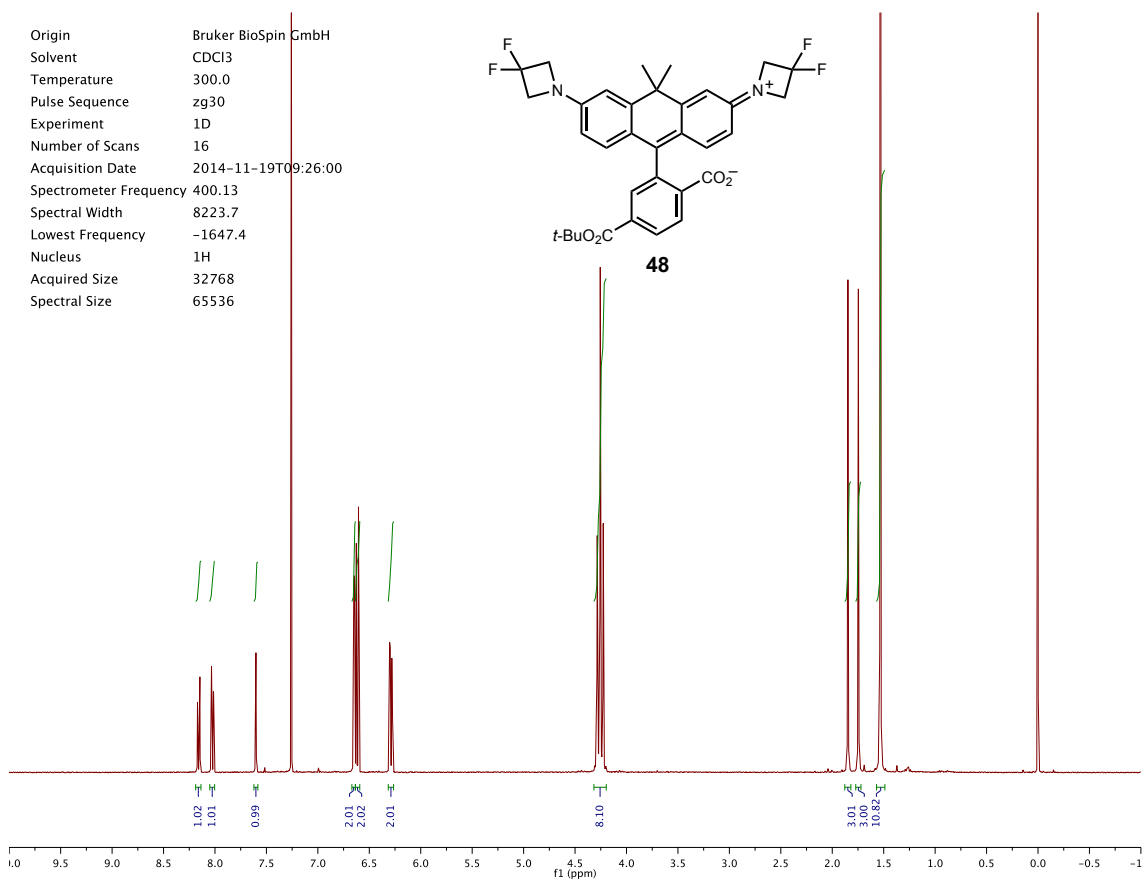

Origin Bruker BioSpin GmbH  
 Solvent CDCl3  
 Temperature 300.0  
 Pulse Sequence zgpg30  
 Experiment 1D  
 Number of Scans 4096  
 Acquisition Date 2014-11-20T01:01:00  
 Spectrometer Frequency 100.62  
 Spectral Width 24038.5  
 Lowest Frequency -1943.3  
 Nucleus 13C  
 Acquired Size 32768  
 Spectral Size 65536

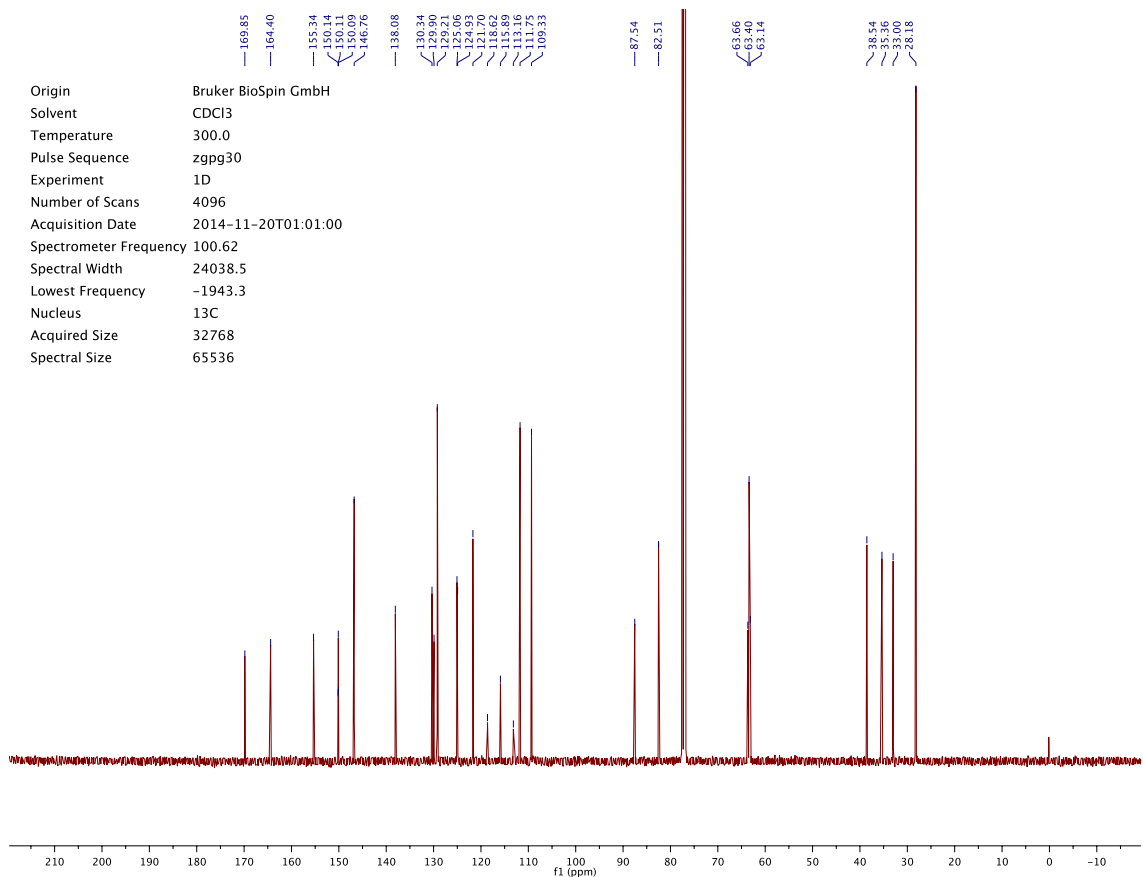

Origin Bruker BioSpin GmbH  
 Solvent CDCl3  
 Temperature 300.0  
 Pulse Sequence zg30  
 Experiment 1D  
 Number of Scans 16  
 Acquisition Date 2014-10-20T09:21:00  
 Spectrometer Frequency 400.13  
 Spectral Width 8223.7  
 Lowest Frequency -1647.3  
 Nucleus 1H  
 Acquired Size 32768  
 Spectral Size 65536

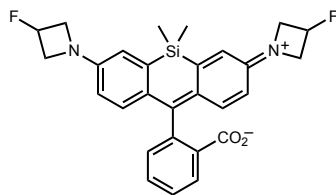

25

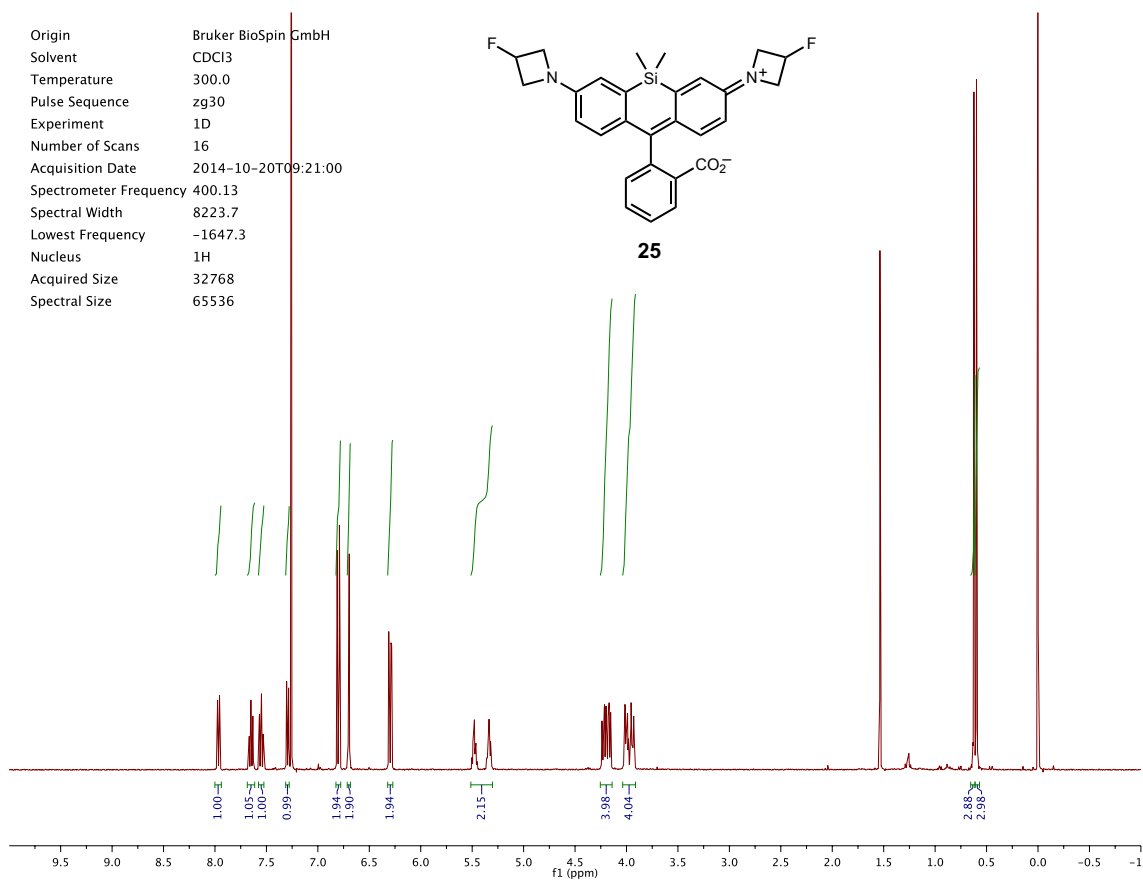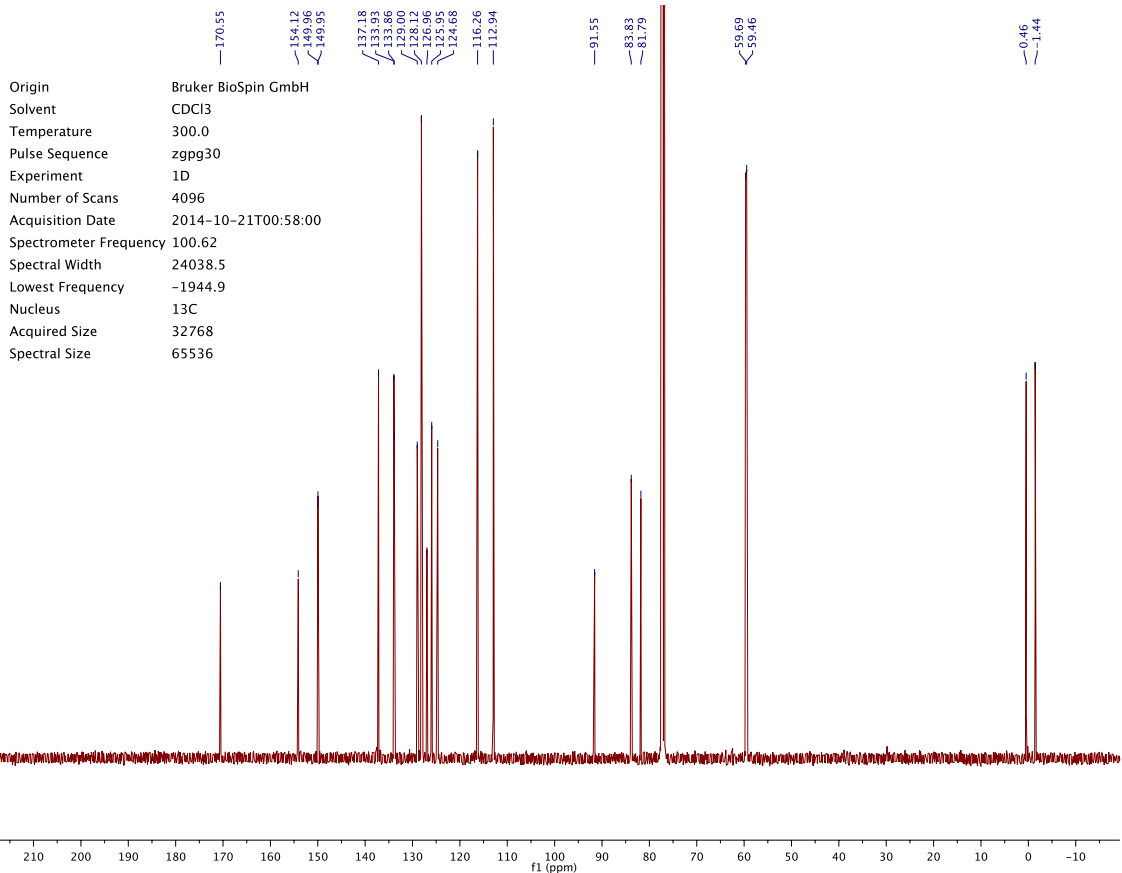

Origin Bruker BioSpin GmbH  
 Solvent CDCl3  
 Temperature 300.0  
 Pulse Sequence zgpg30  
 Experiment 1D  
 Number of Scans 4096  
 Acquisition Date 2014-10-21T00:58:00  
 Spectrometer Frequency 100.62  
 Spectral Width 24038.5  
 Lowest Frequency -1944.9  
 Nucleus 13C  
 Acquired Size 32768  
 Spectral Size 65536

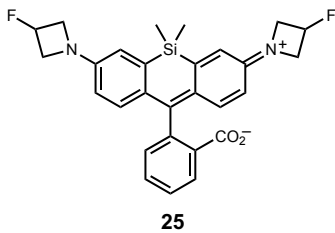

DAD1 E, Sig=650,16 Ref=off (2014\_11\DAILYSEQUENCE\_LC 2014-12-02 11-37-40\2014\_11000002.D)

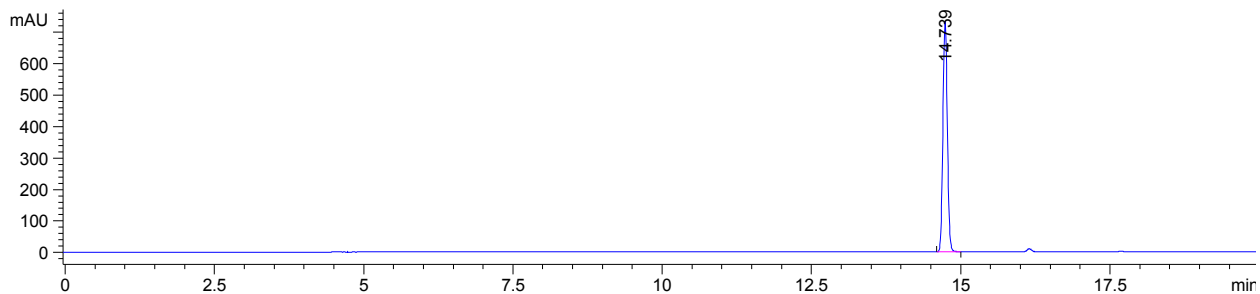

\*MSD1 SPC, time=14.701:14.886 of C:\CHEM32\1\DATA\2014\_11\DAILYSEQUENCE\_LC 2014-12-02 11-37-40\2014\_11000002.D ES-API

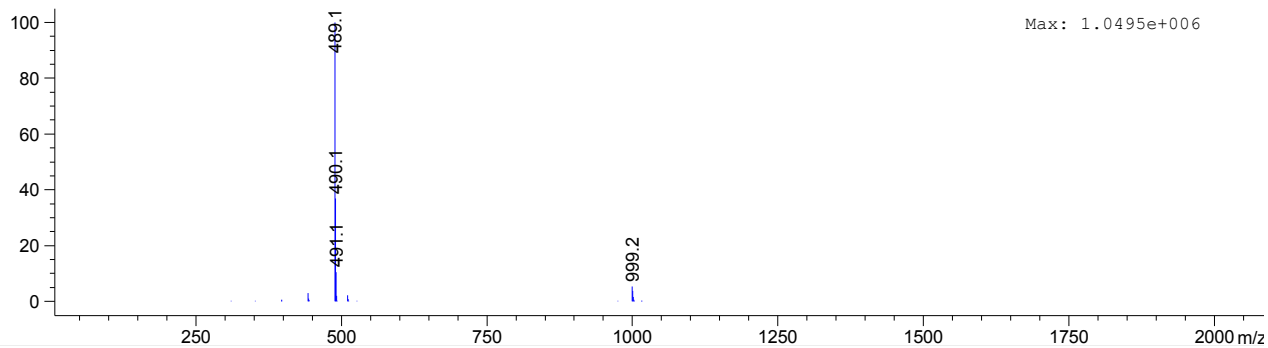



Origin Bruker BioSpin GmbH  
 Solvent CDCl3  
 Temperature 300.0  
 Pulse Sequence zg30  
 Experiment 1D  
 Number of Scans 16  
 Acquisition Date 2015-02-19T10:02:00  
 Modification Date 2015-02-19T10:02:58  
 Spectrometer Frequency 400.13  
 Spectral Width 8223.7  
 Lowest Frequency -1646.2  
 Nucleus 1H  
 Acquired Size 32768  
 Spectral Size 65536

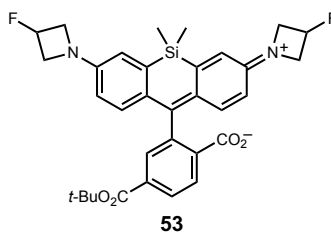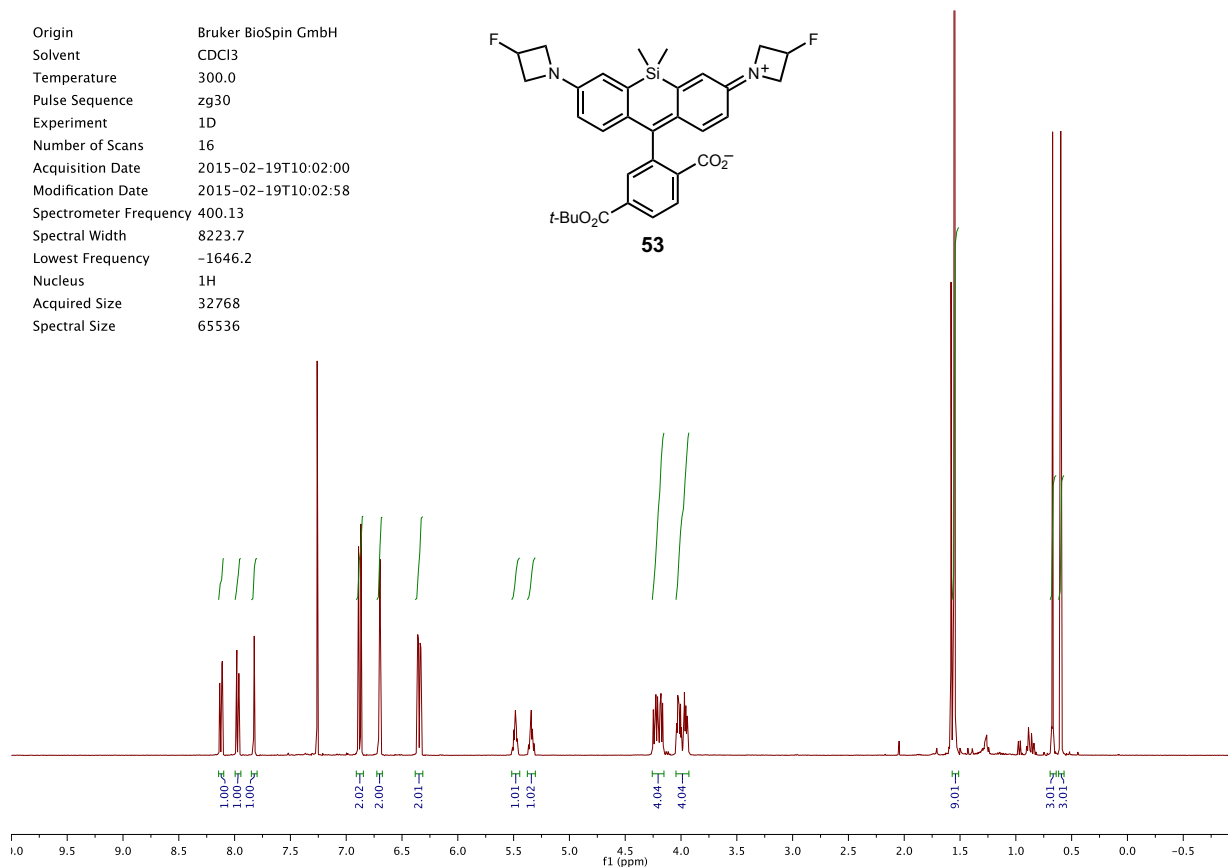

Origin Bruker BioSpin GmbH  
 Solvent CDCl3  
 Temperature 300.0  
 Pulse Sequence zgpg30  
 Experiment 1D  
 Number of Scans 1024  
 Acquisition Date 2015-02-19T11:08:00  
 Modification Date 2015-02-19T11:08:44  
 Spectrometer Frequency 100.62  
 Spectral Width 24038.5  
 Lowest Frequency -1942.1  
 Nucleus 13C  
 Acquired Size 32768  
 Spectral Size 65536

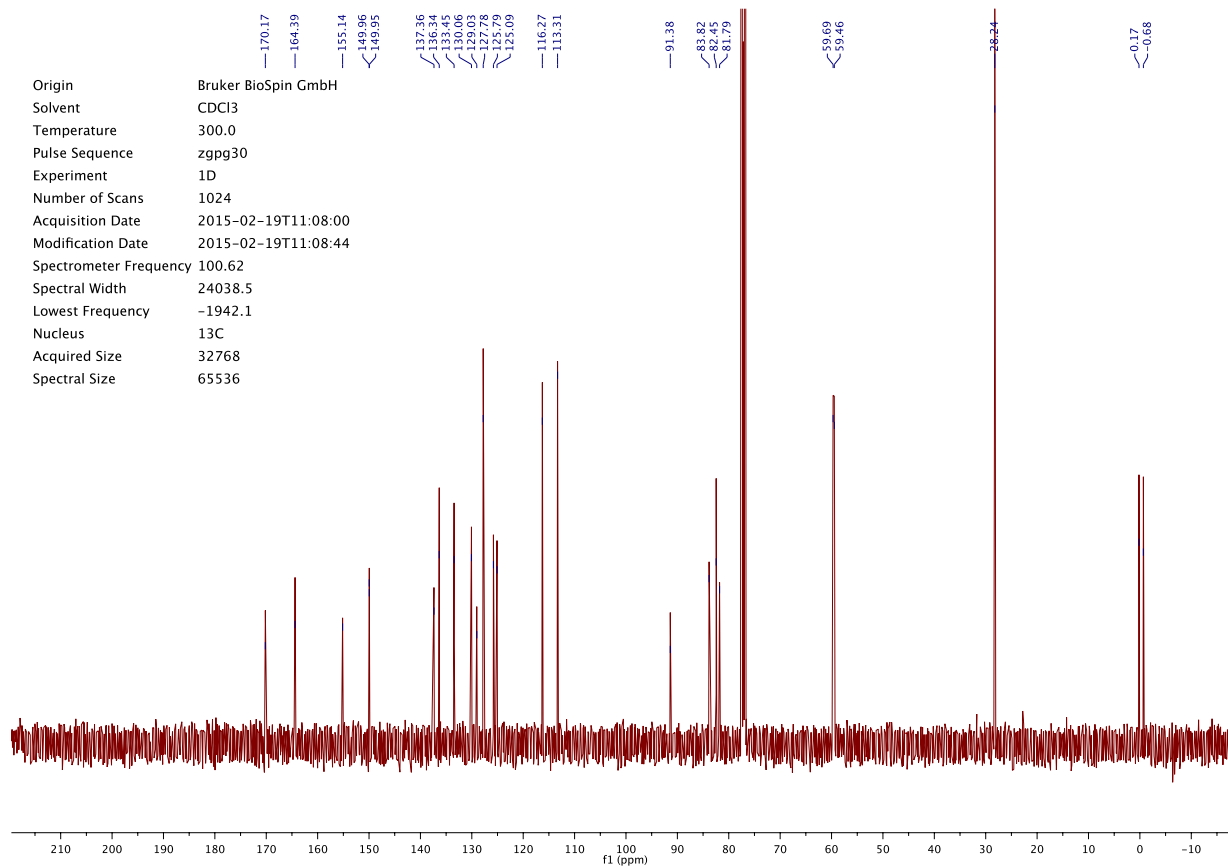

Origin Bruker BioSpin GmbH  
 Solvent MeOD  
 Temperature 300.0  
 Pulse Sequence zg30  
 Experiment 1D  
 Number of Scans 16  
 Acquisition Date 2016-09-28T15:41:00  
 Modification Date 2016-09-28T15:41:08  
 Spectrometer Frequency 400.13  
 Spectral Width 8012.8  
 Lowest Frequency -1550.6  
 Nucleus 1H  
 Acquired Size 32768  
 Spectral Size 65536

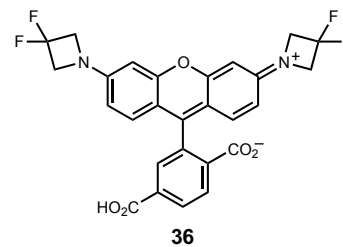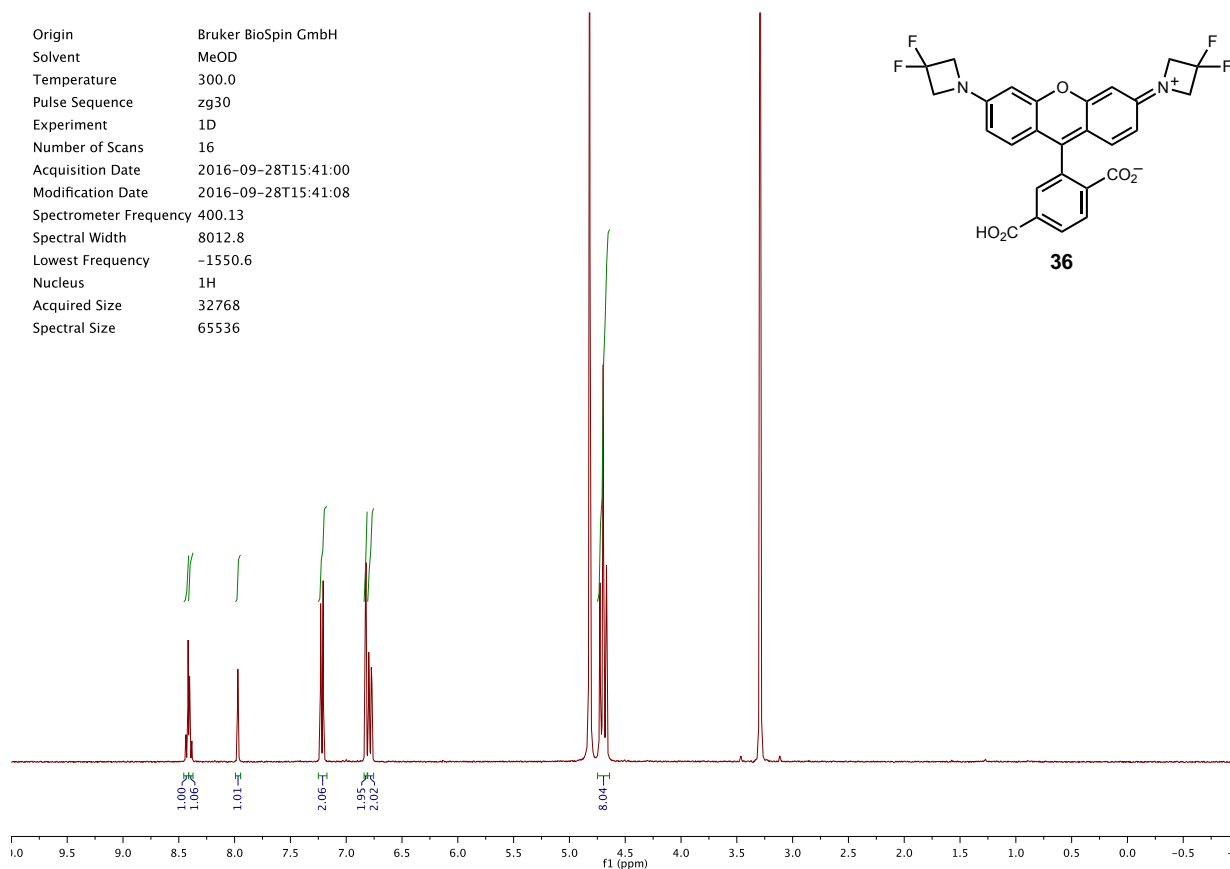

Origin Bruker BioSpin GmbH  
 Solvent MeOD  
 Temperature 300.0  
 Pulse Sequence zgpg30  
 Experiment 1D  
 Number of Scans 1024  
 Acquisition Date 2015-03-16T16:09:00  
 Modification Date 2015-03-16T16:09:30  
 Spectrometer Frequency 100.62  
 Spectral Width 24038.5  
 Lowest Frequency -1815.8  
 Nucleus 13C  
 Acquired Size 32768  
 Spectral Size 65536

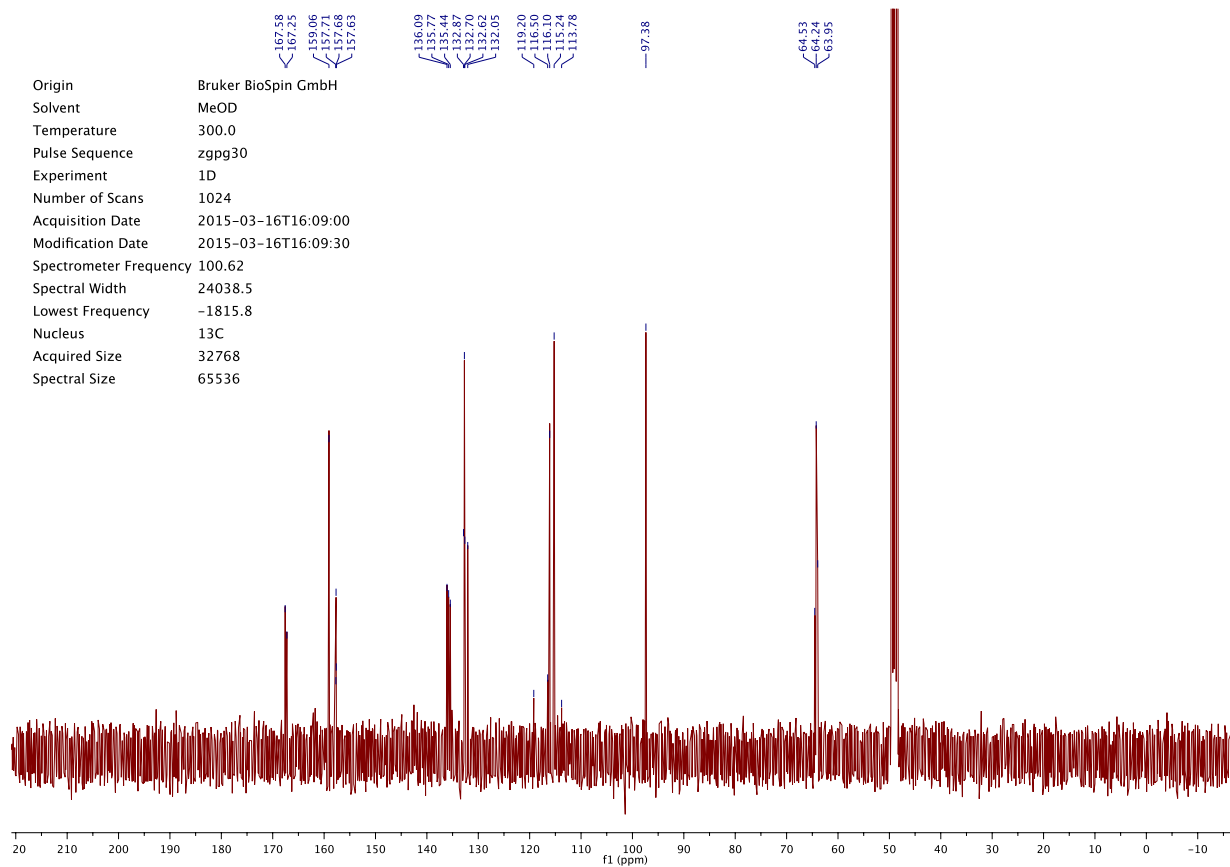

Origin Bruker BioSpin GmbH  
 Solvent DMSO  
 Temperature 300.0  
 Pulse Sequence zg30  
 Experiment 1D  
 Number of Scans 16  
 Acquisition Date 2016-09-27T09:46:00  
 Modification Date 2016-09-27T09:46:41  
 Spectrometer Frequency 400.13  
 Spectral Width 8012.8  
 Lowest Frequency -1541.8  
 Nucleus 1H  
 Acquired Size 32768  
 Spectral Size 65536

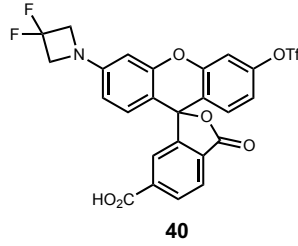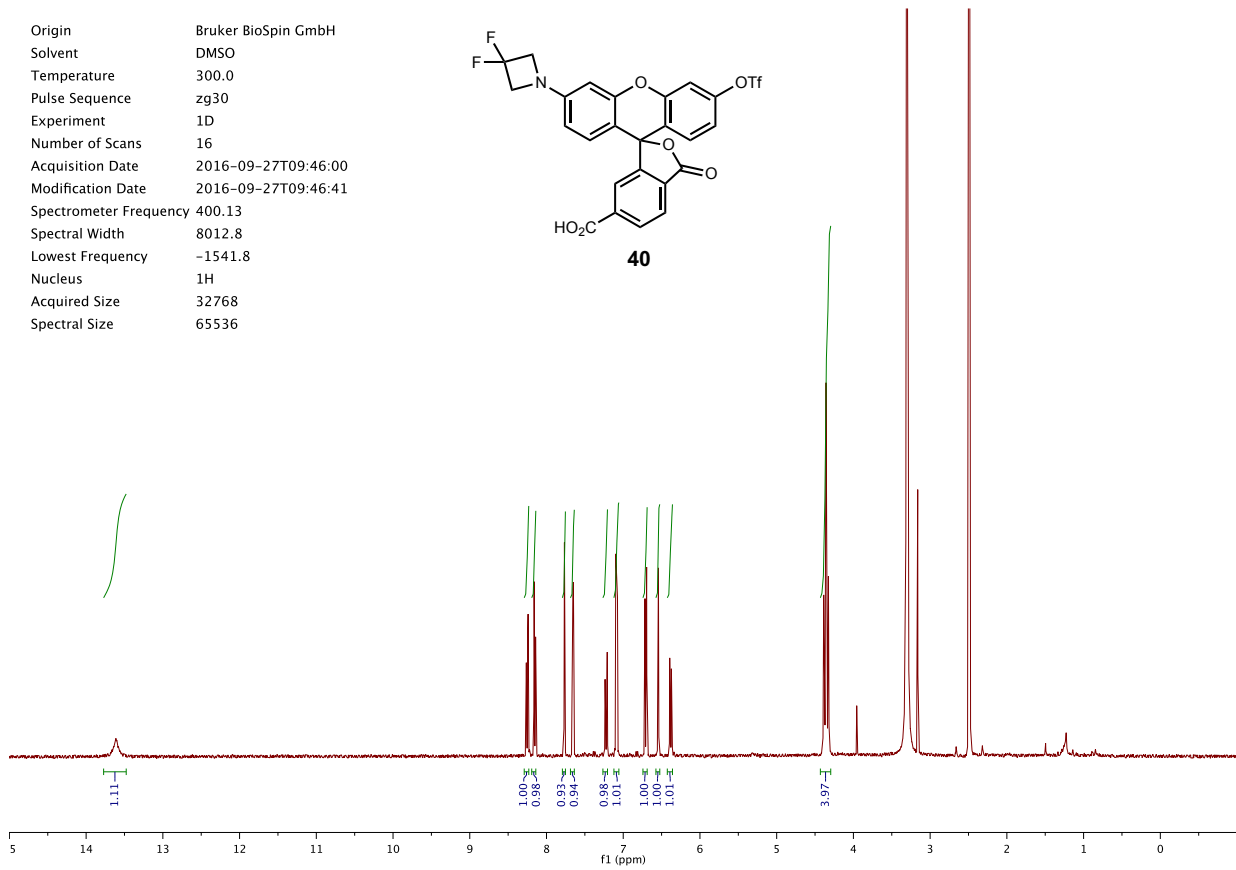

Origin Bruker BioSpin GmbH  
 Solvent DMSO  
 Temperature 300.0  
 Pulse Sequence zgpg30  
 Experiment 1D  
 Number of Scans 8192  
 Acquisition Date 2016-09-29T04:52:00  
 Modification Date 2016-09-29T04:52:52  
 Spectrometer Frequency 100.62  
 Spectral Width 24038.5  
 Lowest Frequency -2007.7  
 Nucleus 13C  
 Acquired Size 32768  
 Spectral Size 65536

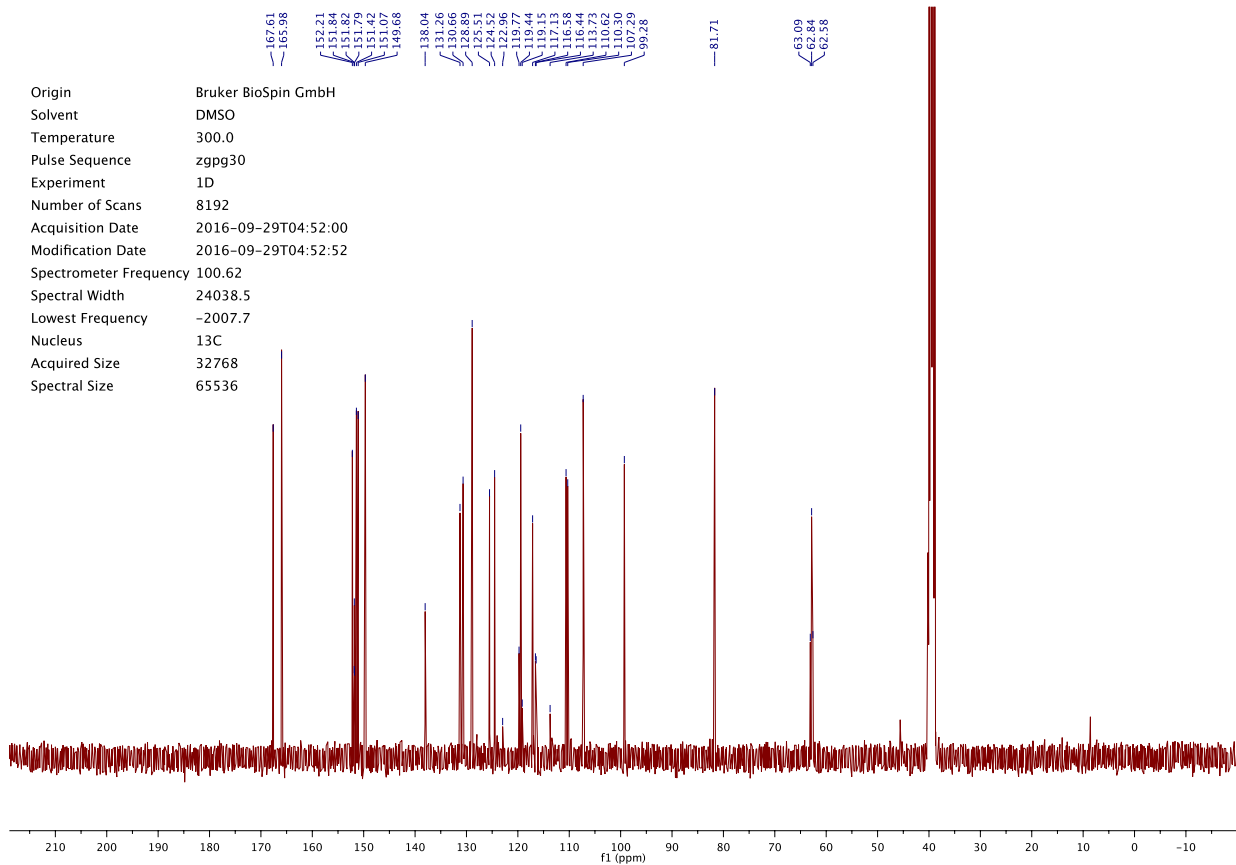

Origin Bruker BioSpin GmbH  
 Solvent MeOD  
 Temperature 300.0  
 Pulse Sequence zg30  
 Experiment 1D  
 Number of Scans 16  
 Acquisition Date 2013-08-13T16:58:00  
 Spectrometer Frequency 400.13  
 Spectral Width 8223.7  
 Lowest Frequency -1644.1  
 Nucleus 1H  
 Acquired Size 32768  
 Spectral Size 65536

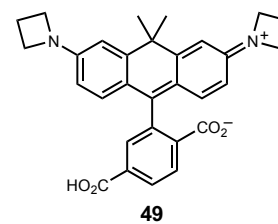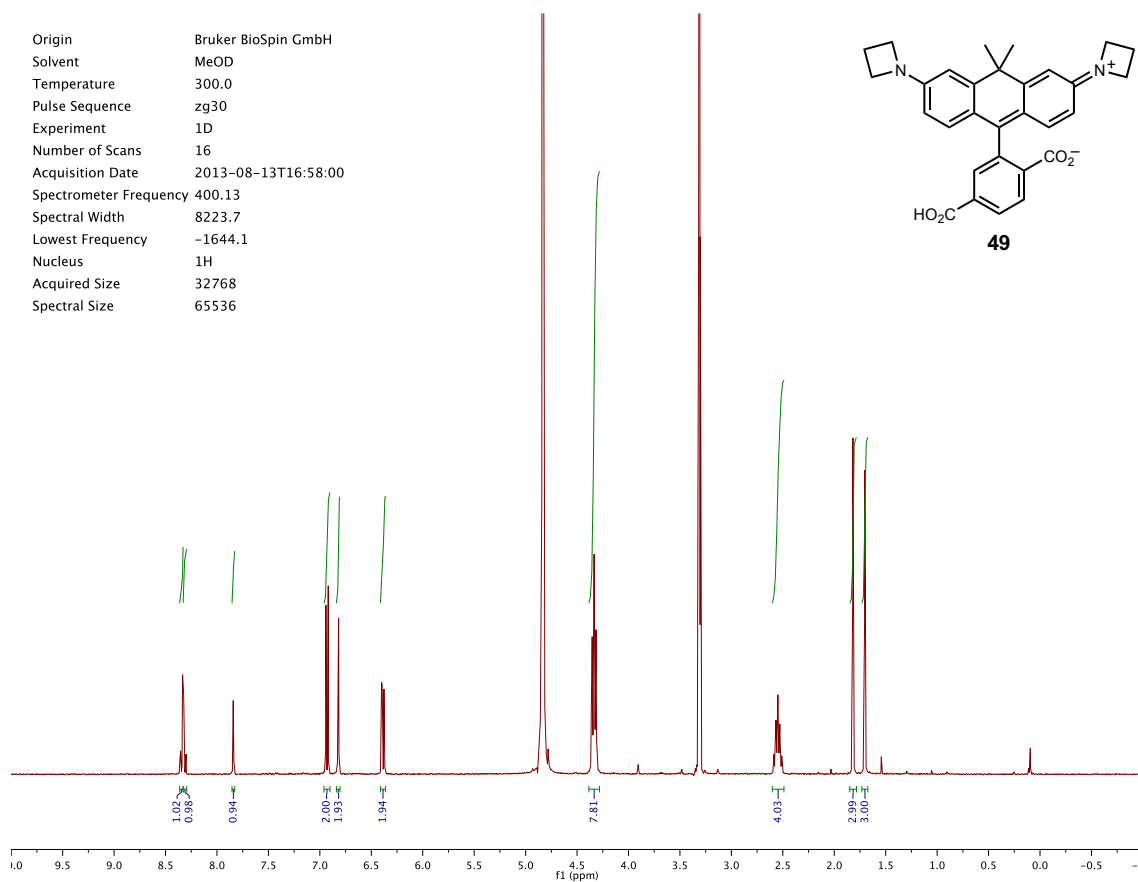

Origin Bruker BioSpin GmbH  
 Solvent MeOD  
 Temperature 300.0  
 Pulse Sequence zgpg30  
 Experiment 1D  
 Number of Scans 8192  
 Acquisition Date 2013-08-16T04:51:00  
 Spectrometer Frequency 100.62  
 Spectral Width 24038.5  
 Lowest Frequency -1816.0  
 Nucleus 13C  
 Acquired Size 32768  
 Spectral Size 65536

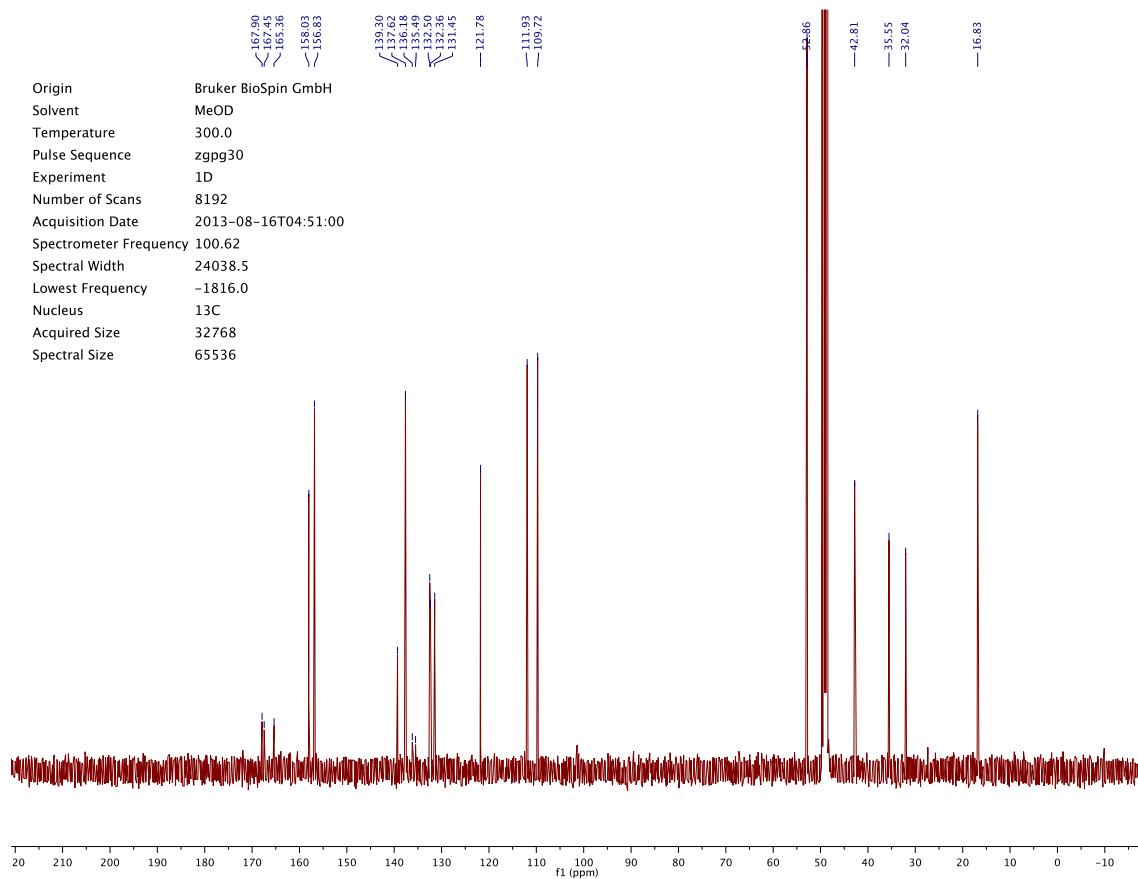

Origin Bruker BioSpin GmbH  
 Solvent MeOD  
 Temperature 300.0  
 Pulse Sequence zg30  
 Experiment 1D  
 Number of Scans 16  
 Acquisition Date 2014-11-24T09:29:00  
 Spectrometer Frequency 400.13  
 Spectral Width 8223.7  
 Lowest Frequency -1644.2  
 Nucleus 1H  
 Acquired Size 32768  
 Spectral Size 65536

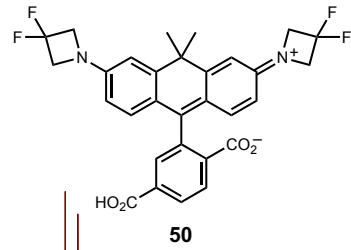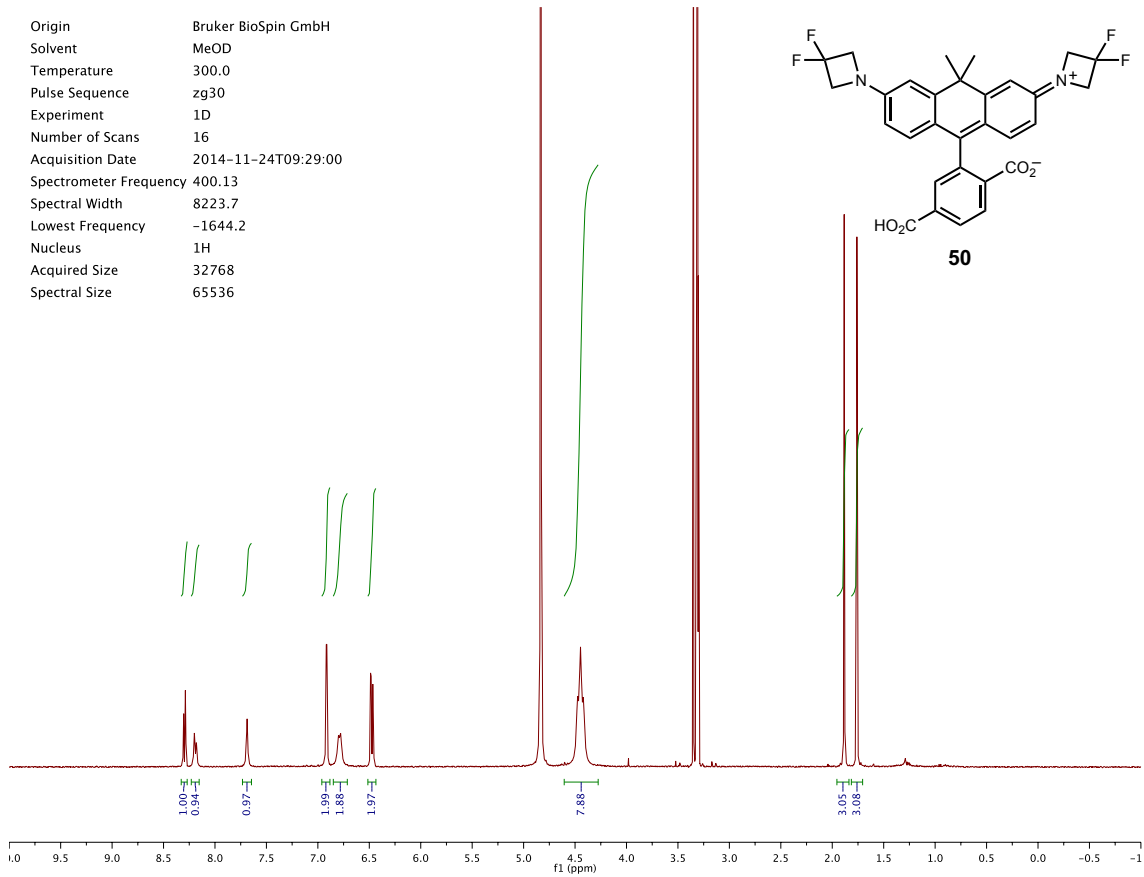

Origin Bruker BioSpin GmbH  
 Solvent DMSO  
 Temperature 350.0  
 Pulse Sequence zgpg30  
 Experiment 1D  
 Number of Scans 4096  
 Acquisition Date 2016-10-06T20:57:00  
 Modification Date 2016-10-06T20:57:09  
 Spectrometer Frequency 100.62  
 Spectral Width 24038.5  
 Lowest Frequency -2042.5  
 Nucleus 13C  
 Acquired Size 32768  
 Spectral Size 65536

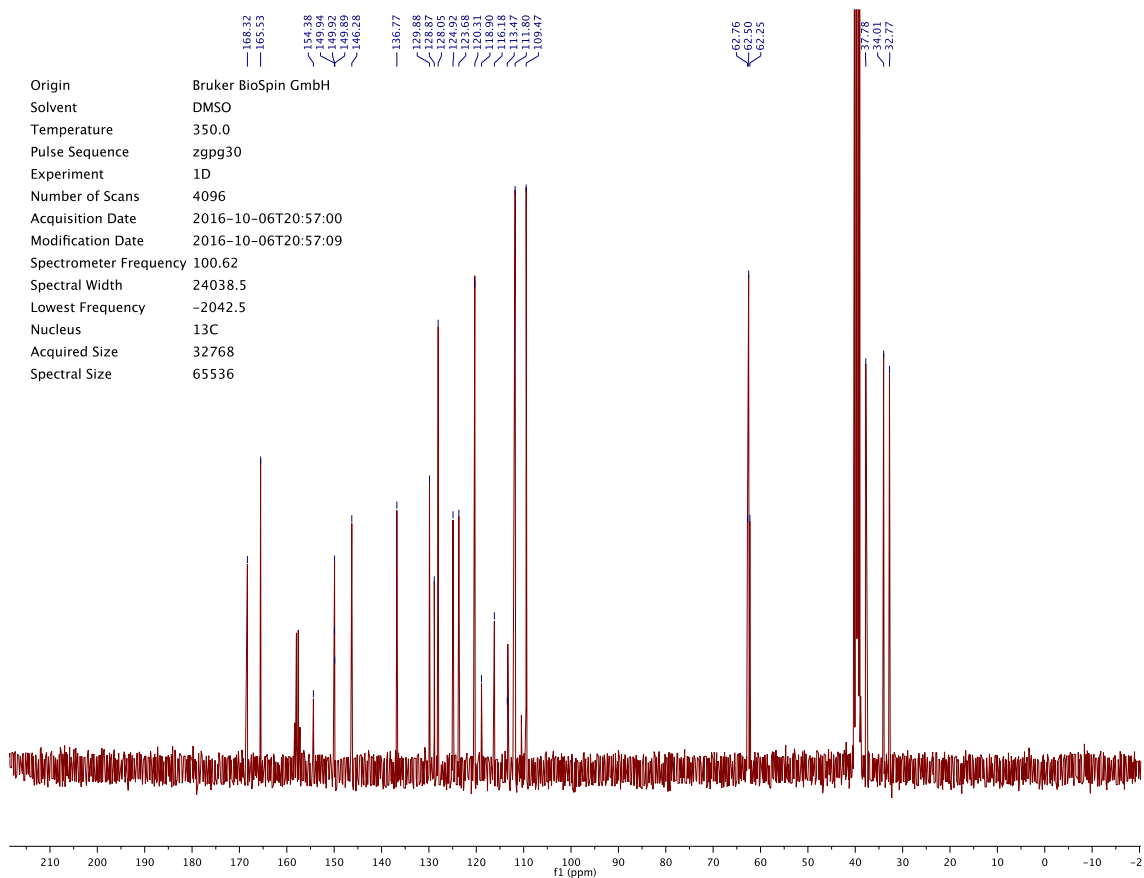

Origin Bruker BioSpin GmbH  
 Solvent MeOD  
 Temperature 300.0  
 Pulse Sequence zg30  
 Experiment 1D  
 Number of Scans 16  
 Acquisition Date 2015-02-24T17:52:00  
 Modification Date 2015-02-24T17:52:46  
 Spectrometer Frequency 400.13  
 Spectral Width 8223.7  
 Lowest Frequency -1639.3  
 Nucleus 1H  
 Acquired Size 32768  
 Spectral Size 65536

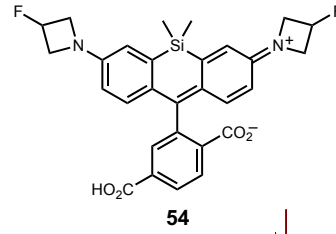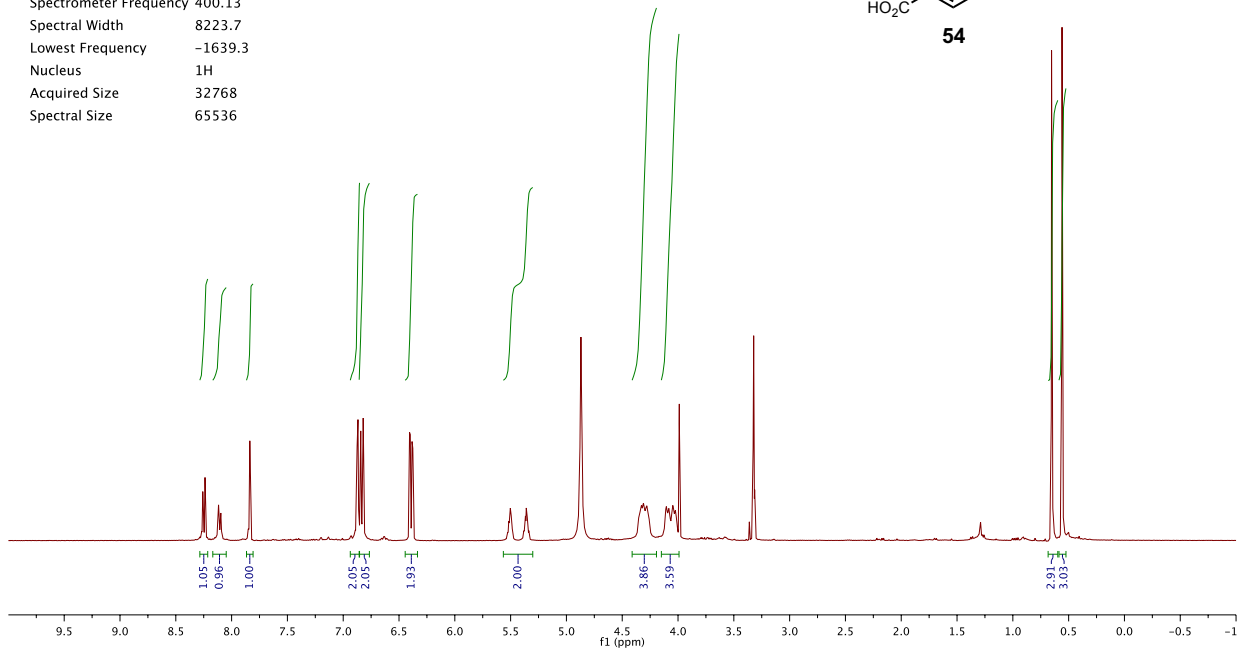

168.61  
 165.52  
 154.61  
 149.52  
 149.51  
 136.28  
 131.79  
 129.59  
 127.81  
 126.96  
 123.89  
 115.77  
 113.07  
 83.95  
 81.95  
 58.93  
 58.69  
 -0.61  
 -1.43

Origin Bruker BioSpin GmbH  
 Solvent DMSO  
 Temperature 350.0  
 Pulse Sequence zgpg30  
 Experiment 1D  
 Number of Scans 4096  
 Acquisition Date 2016-10-07T02:09:00  
 Modification Date 2016-10-07T02:09:16  
 Spectrometer Frequency 100.62  
 Spectral Width 24038.5  
 Lowest Frequency -2043.4  
 Nucleus 13C  
 Acquired Size 32768  
 Spectral Size 65536

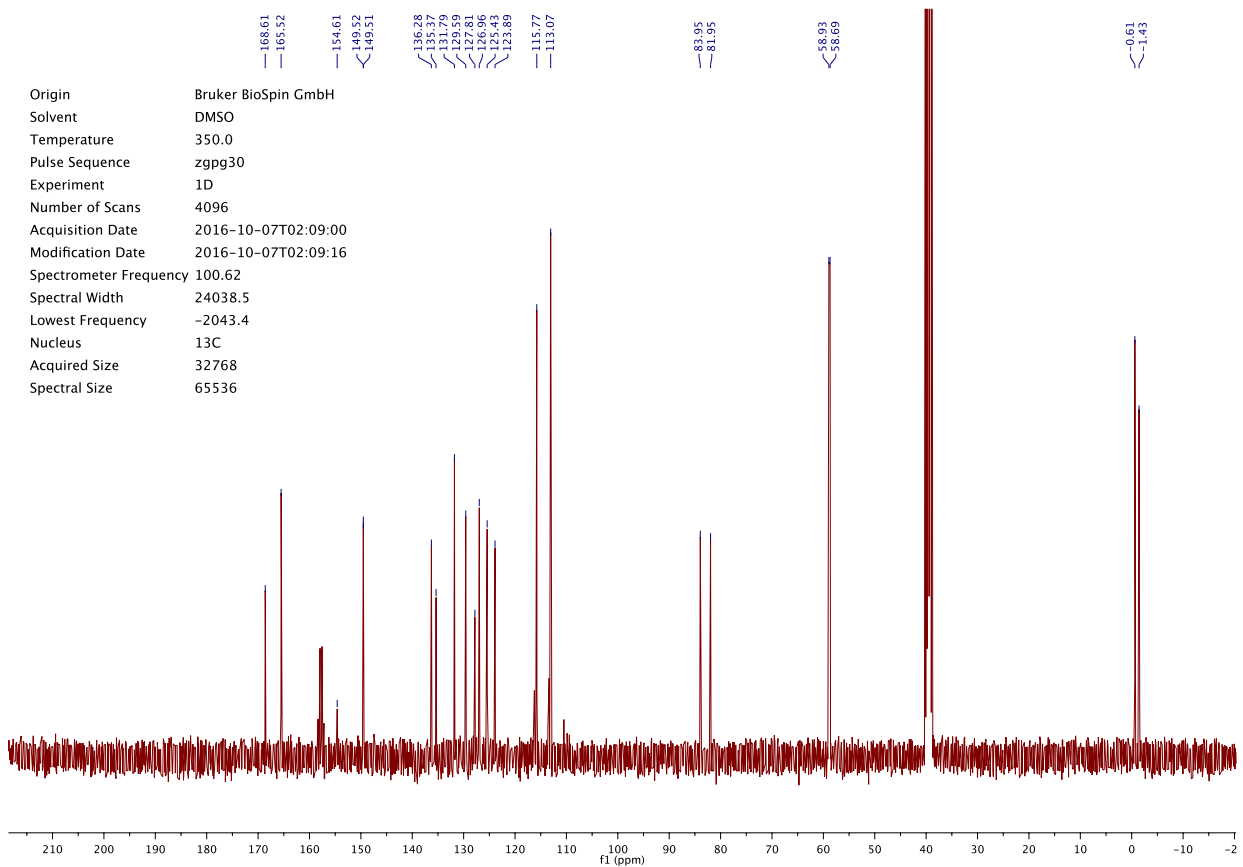

Origin Bruker BioSpin GmbH  
 Solvent CDCl3  
 Temperature 300.0  
 Pulse Sequence zg30  
 Experiment 1D  
 Number of Scans 16  
 Acquisition Date 2015-01-30T17:19:00  
 Modification Date 2015-01-30T17:19:30  
 Spectrometer Frequency 400.13  
 Spectral Width 8223.7  
 Lowest Frequency -1646.2  
 Nucleus 1H  
 Acquired Size 32768  
 Spectral Size 65536

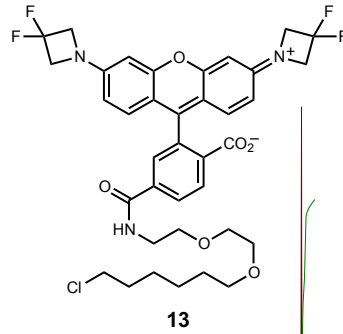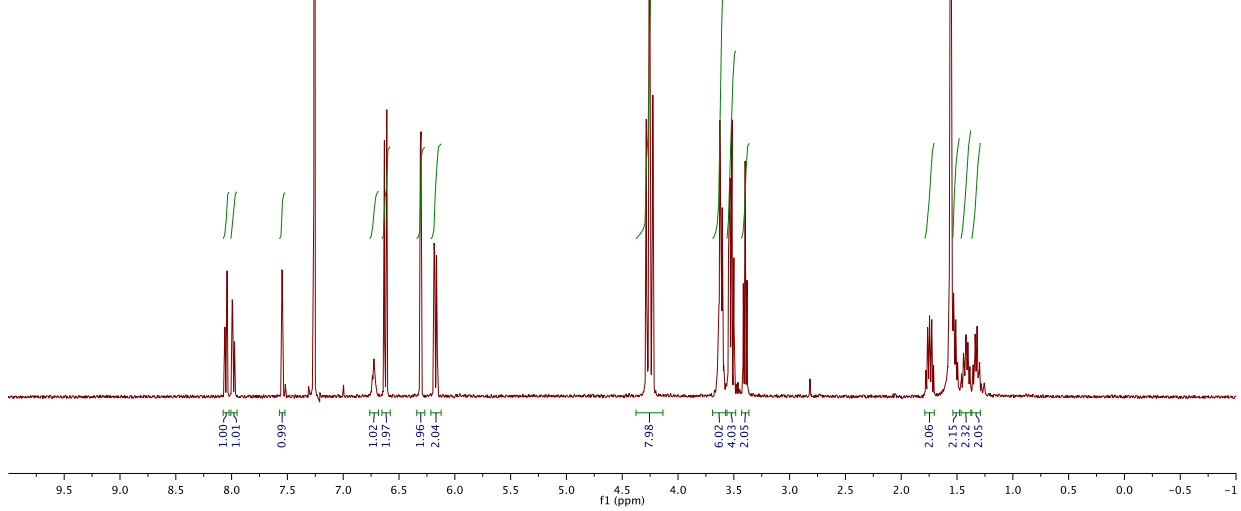

DAD1 C, Sig=550,8 Ref=off (2015\_01\DAIILYSQUENCE\_LC 2015-01-07 12-41-09\2015\_01000007.D)

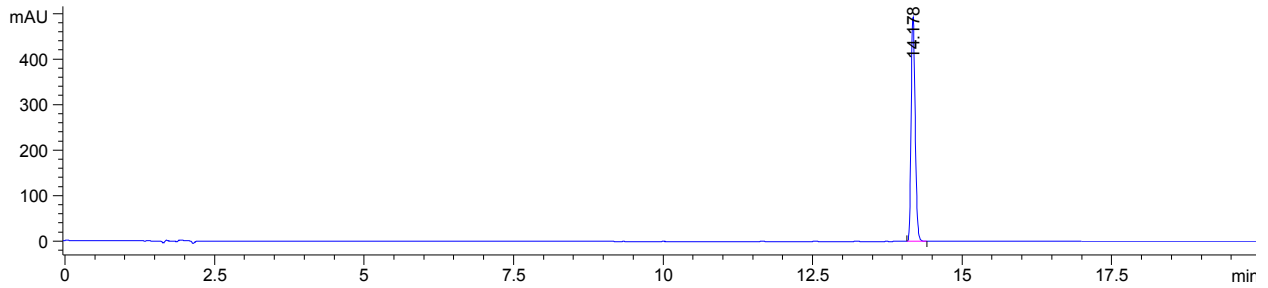

\*MSD1 SPC, time=14.169:14.280 of C:\CHEM32\1\DATA\2015\_01\DAIILYSSEQUENCE\_LC 2015-01-07 12-41-09\2015\_01000007.D ES-API

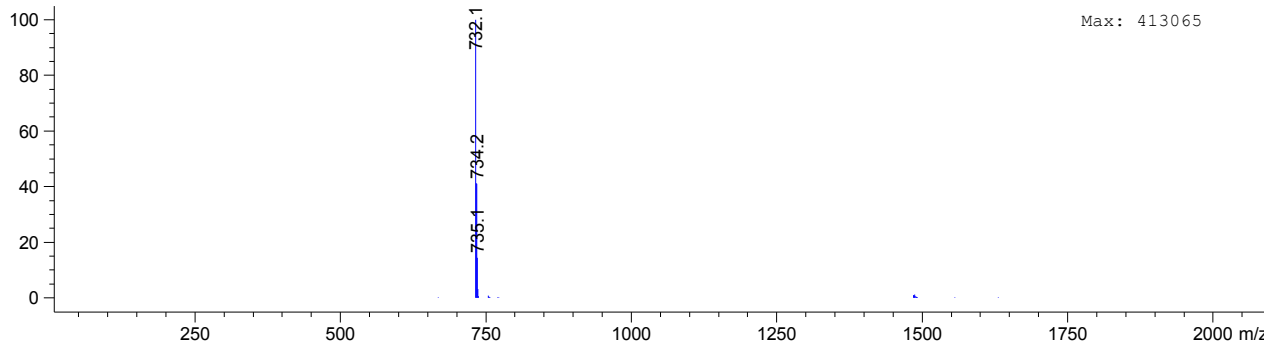

Origin Bruker BioSpin GmbH  
Solvent MeOD  
Temperature 300.0  
Pulse Sequence zg30  
Experiment 1D  
Number of Scans 16  
Acquisition Date 2016-10-03T10:13:00  
Modification Date 2016-10-03T10:13:36  
Spectrometer Frequency 400.13  
Spectral Width 8012.8  
Lowest Frequency -1543.3  
Nucleus 1H  
Acquired Size 32768  
Spectral Size 65536

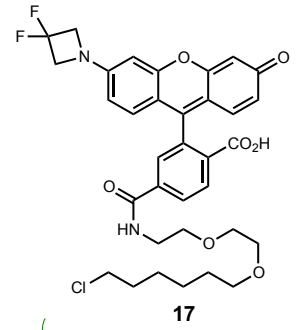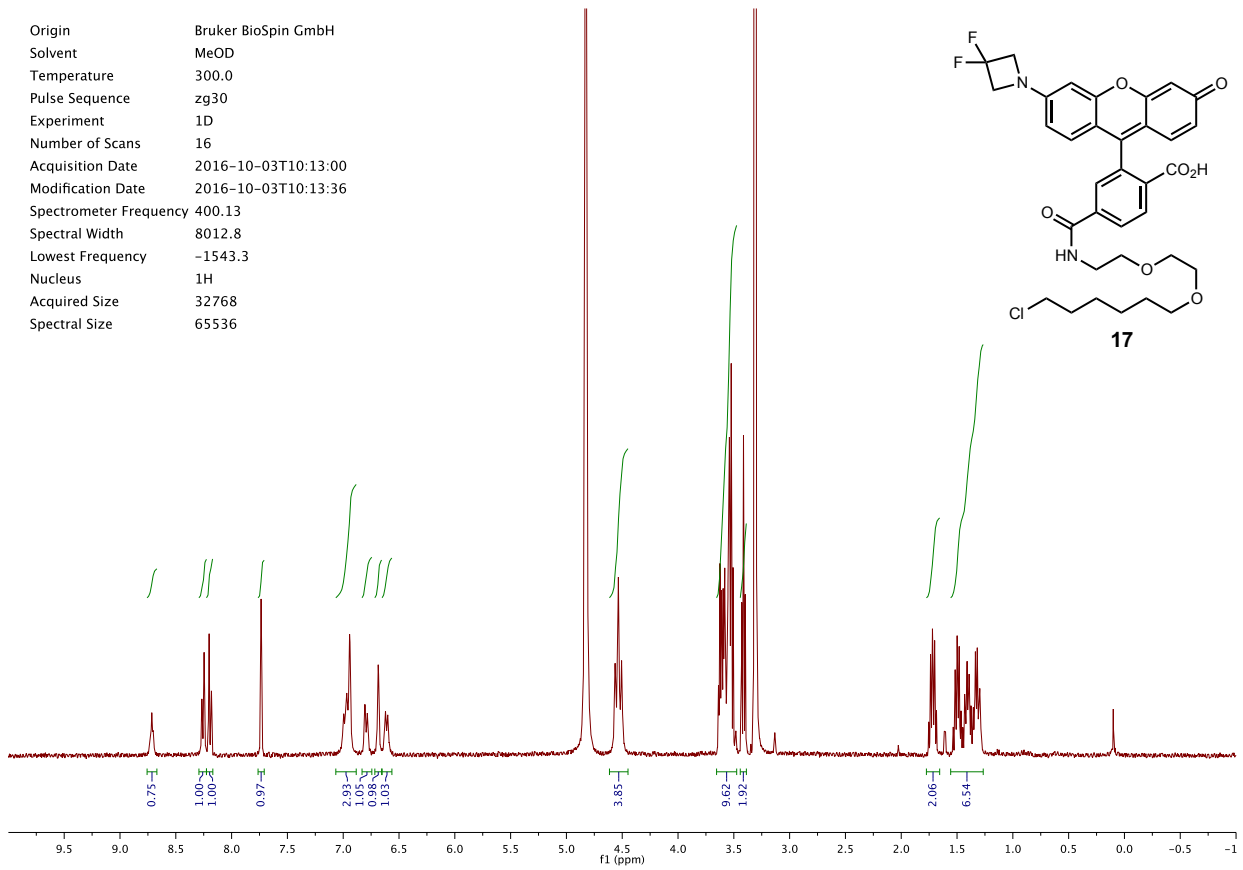

DAD1 B, Sig=500,4 Ref=off (2016\_09DAILY\_SEQUENCE\_LC 2016-09-28 13-11-22\2016\_090000002.D)

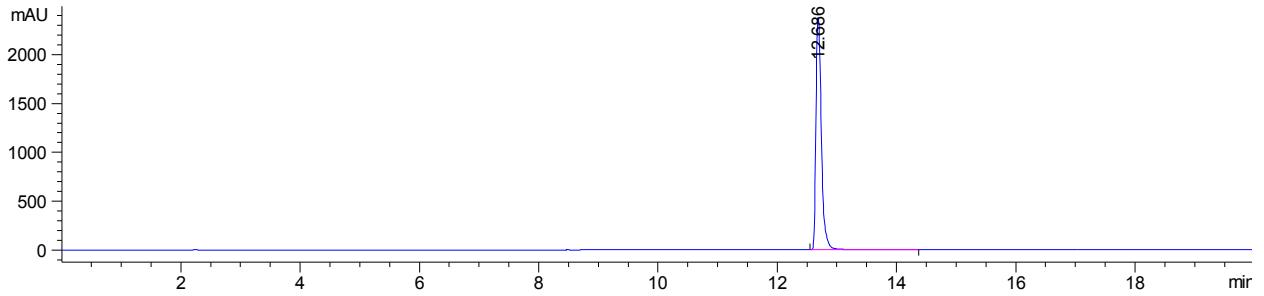

\*MSD2 SPC, time=12.697:12.806 of C:\CHEM32\1\DATA\2016\_09\DAILY\_SEQUENCE\_LC 2016-09-28 13-11-22\2016\_090000002.D ES-

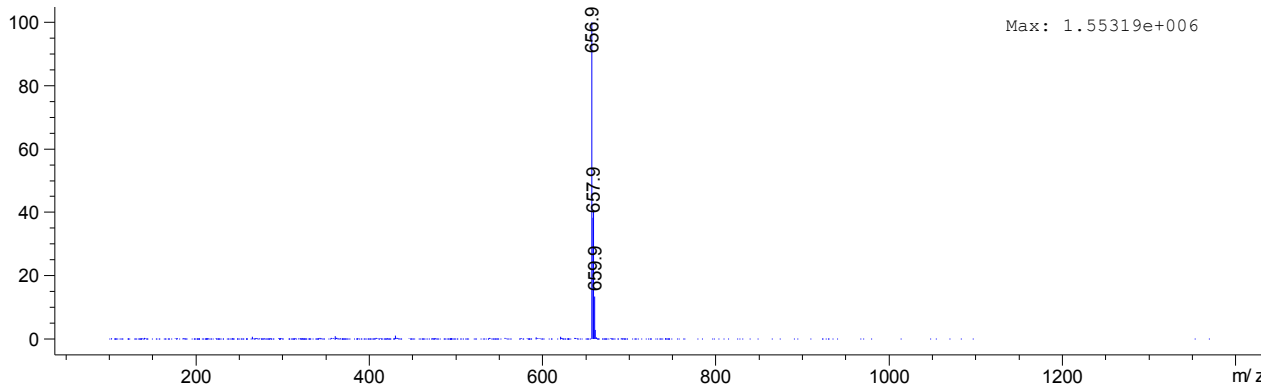



Origin Bruker BioSpin GmbH  
 Solvent CDCl3  
 Temperature 300.0  
 Pulse Sequence zg30  
 Experiment 1D  
 Number of Scans 16  
 Acquisition Date 2014-01-31T08:45:00  
 Spectrometer Frequency 400.13  
 Spectral Width 8223.7  
 Lowest Frequency -1645.1  
 Nucleus 1H  
 Acquired Size 32768  
 Spectral Size 65536

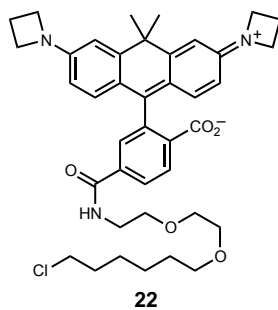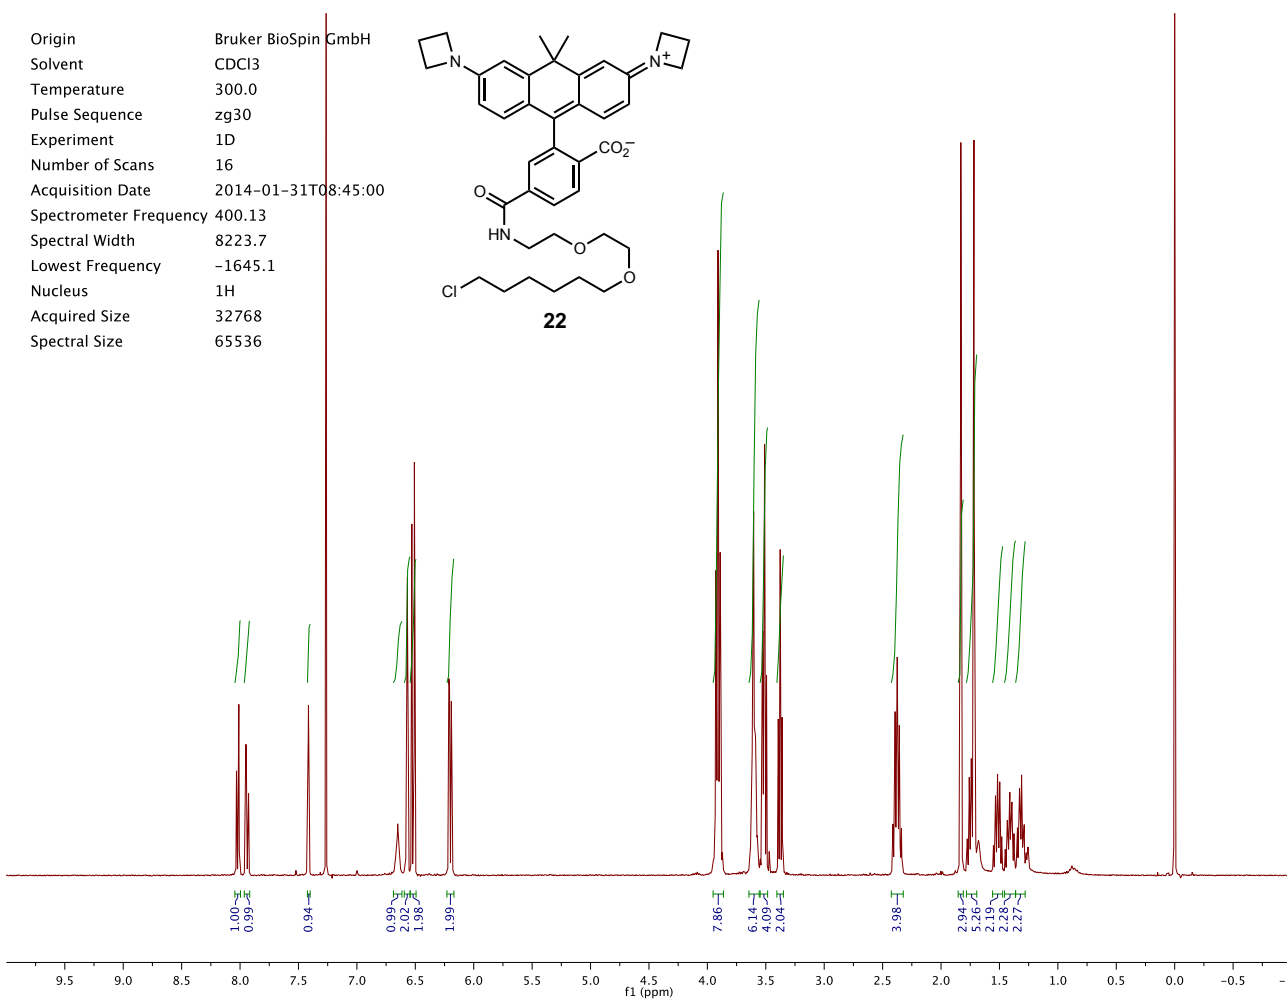

DAD1 D, Sig=600,8 Ref=off (2013\_12DAILYSEQUENCE\_LC 2014-01-30 09-27-59\2013\_12000003.D)

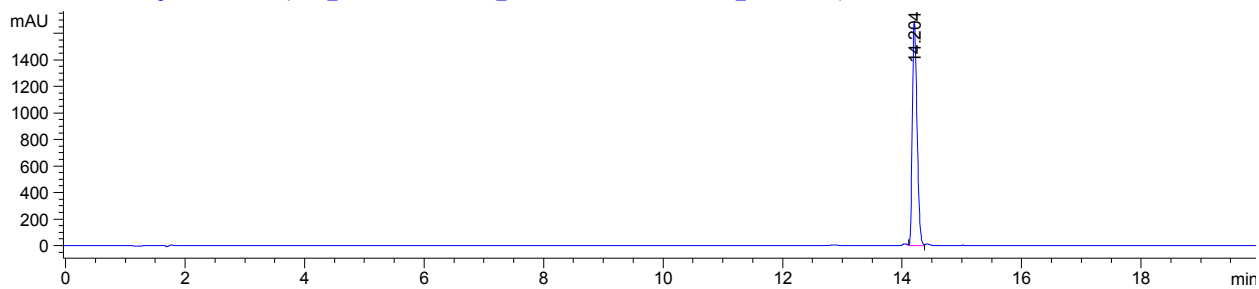

\*MSD1 SPC, time=14.206:14.299 of C:\CHEM321\DATA\2013\_12DAILYSEQUENCE\_LC 2014-01-30 09-27-59\2013\_12000003.D ES-API

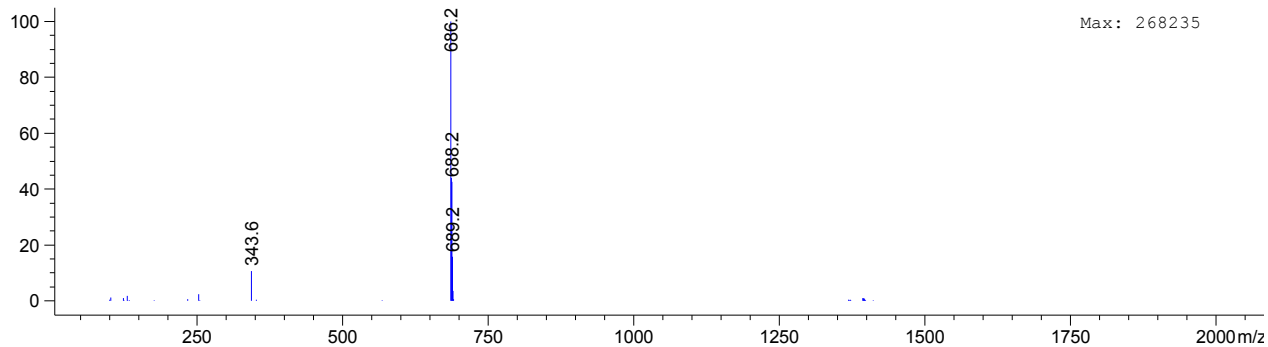

Origin: Bruker BioSpin GmbH  
 Solvent: CDCl3  
 Temperature: 300.0  
 Pulse Sequence: zg30  
 Experiment: 1D  
 Number of Scans: 16  
 Acquisition Date: 2014-11-25T14:45:00  
 Spectrometer Frequency: 400.13  
 Spectral Width: 8223.7  
 Lowest Frequency: -1647.0  
 Nucleus: 1H  
 Acquired Size: 32768  
 Spectral Size: 65536

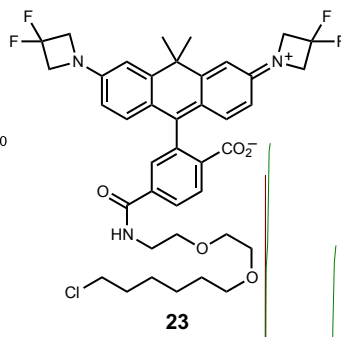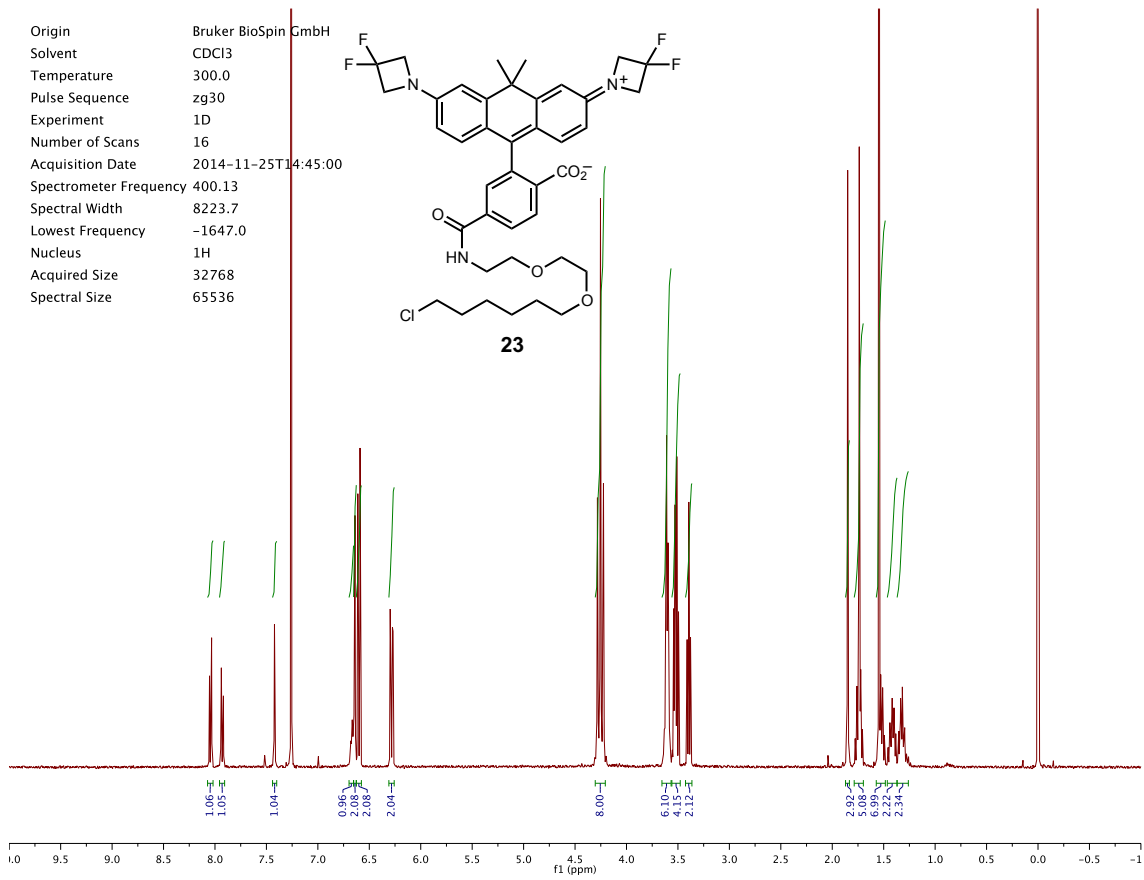

DAD1 D, Sig=600,8 Ref=off (2014\_11\DAILYSEQUENCE\_LC 2014-11-24 15-06-35\2014\_11000002.D)

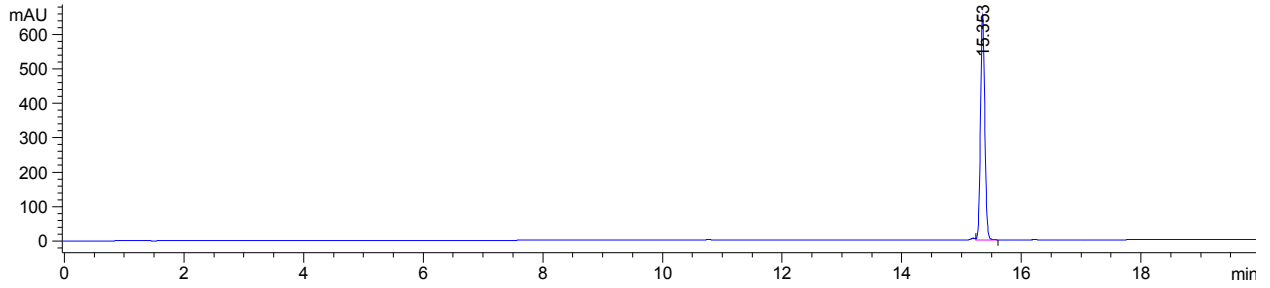

\*MSD1 SPC, time=15.311:15.495 of C:\CHEM32\1\DATA\2014\_11\DAILYSEQUENCE\_LC 2014-11-24 15-06-35\2014\_11000002.D ES-API

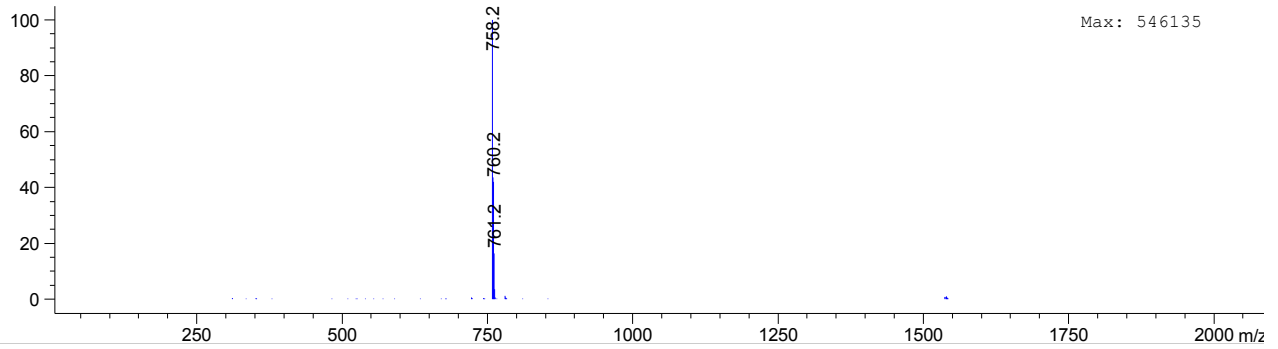

Origin: Bruker BioSpin GmbH  
 Solvent: CDCl3  
 Temperature: 300.0  
 Pulse Sequence: zg30  
 Experiment: 1D  
 Number of Scans: 16  
 Acquisition Date: 2015-03-16T12:57:00  
 Modification Date: 2015-03-16T12:57:06  
 Spectrometer Frequency: 400.13  
 Spectral Width: 8223.7  
 Lowest Frequency: -1646.2  
 Nucleus: 1H  
 Acquired Size: 32768  
 Spectral Size: 65536

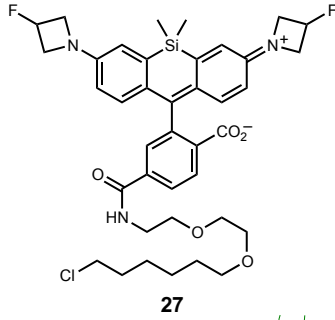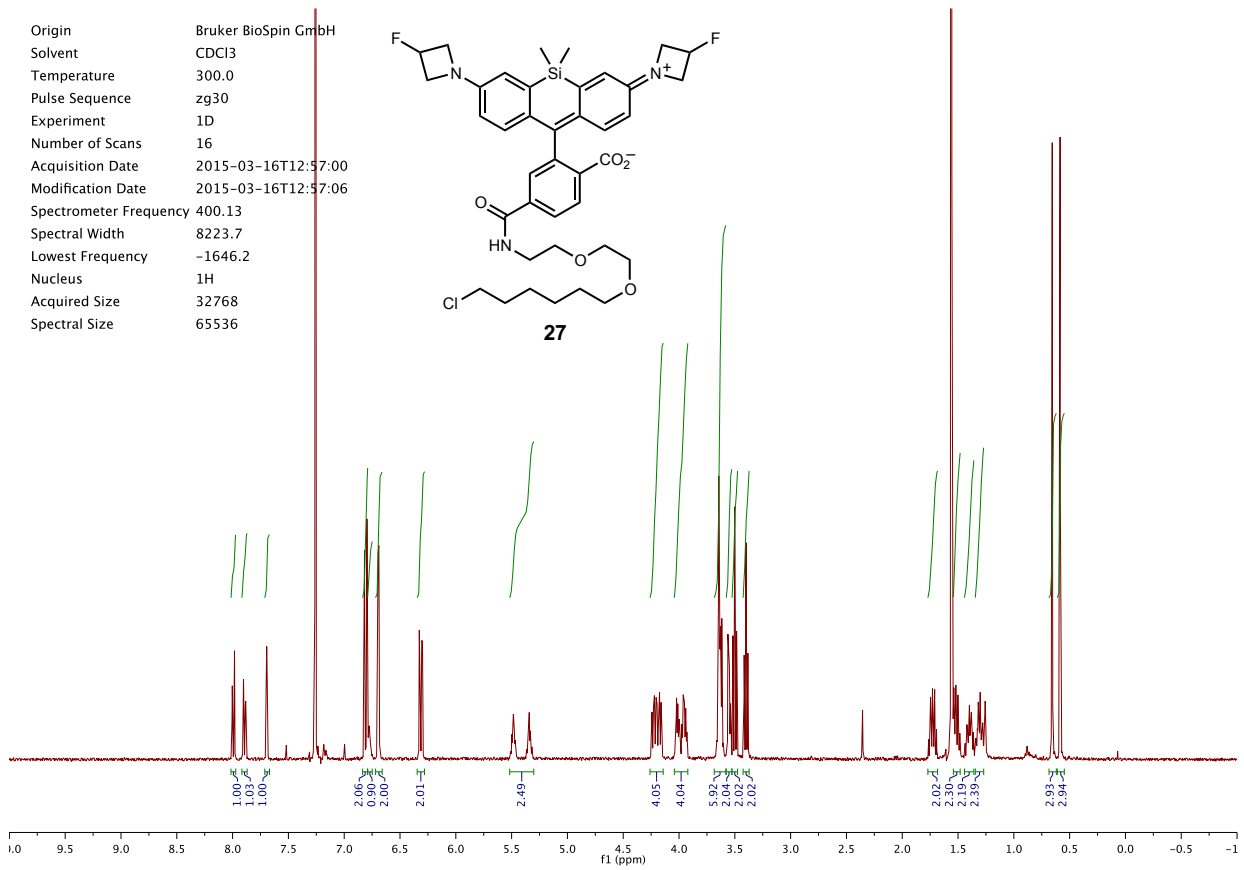

DAD1 D, Sig=633,8 Ref=off (2015\_03DAILYSEQUENCE\_LC 2015-03-16 13-12-15/2015\_03000010.D)

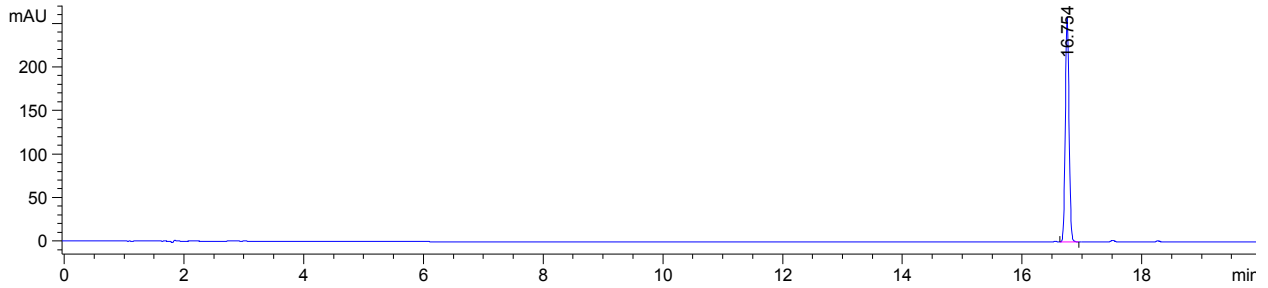

\*MSD1 SPC, time=16.737:16.829 of C:\CHEM32\1\DATA\2015\_03DAILYSEQUENCE\_LC 2015-03-16 13-12-15/2015\_03000010.D ES-API

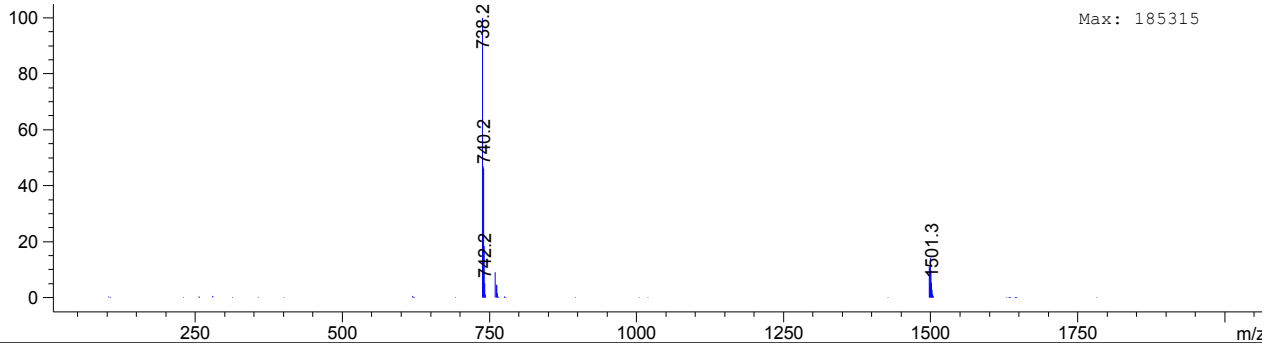

Origin Bruker BioSpin GmbH  
 Solvent MeOD  
 Temperature 300.0  
 Pulse Sequence zg30  
 Experiment 1D  
 Number of Scans 16  
 Acquisition Date 2015-05-18T15:44:00  
 Modification Date 2015-05-18T15:44:33  
 Spectrometer Frequency 400.13  
 Spectral Width 8223.7  
 Lowest Frequency -1644.2  
 Nucleus 1H  
 Acquired Size 32768  
 Spectral Size 65536

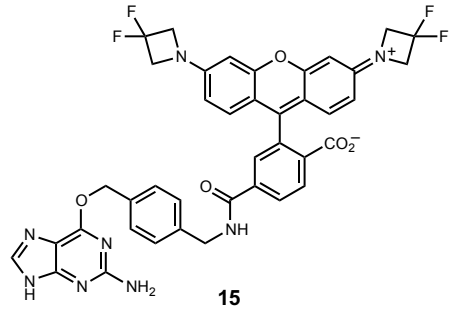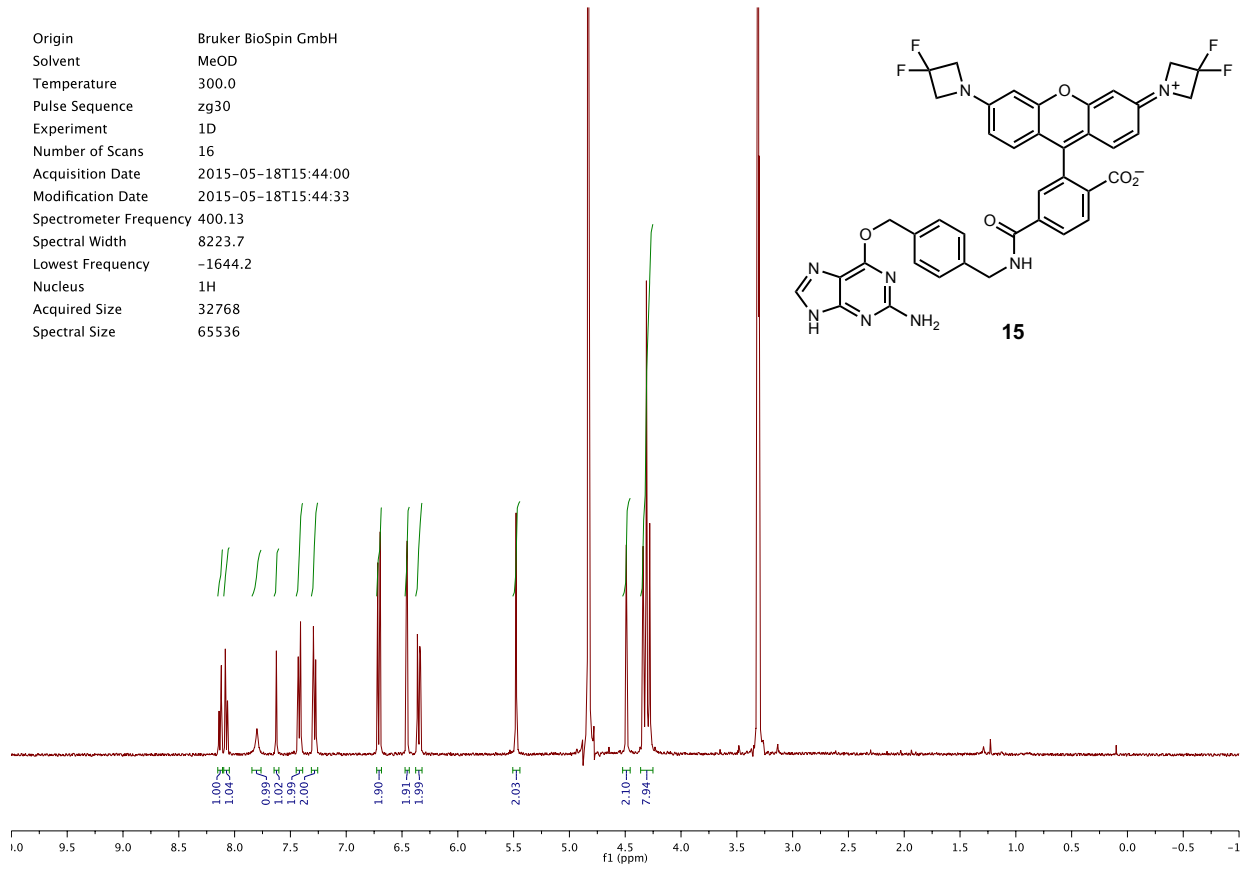

DAD1 C, Sig=550.4 Ref=off (2016\_11\DAIY\_SEQUENCE\_LC 2016-11-28 09-43-52\2016\_11000003.D)

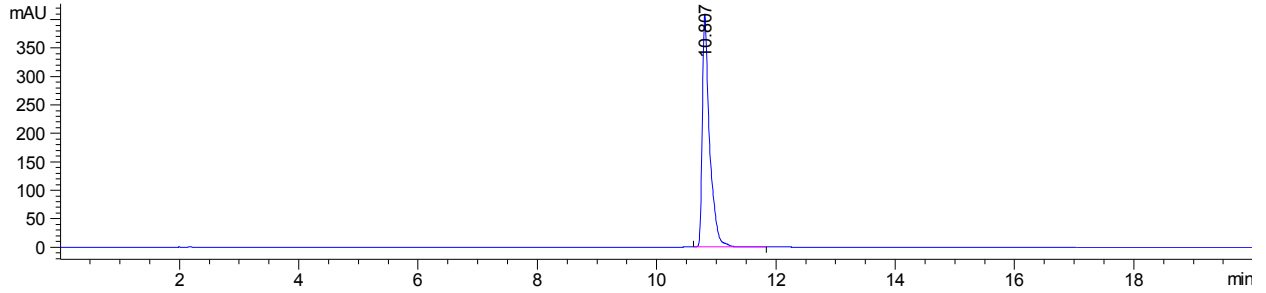

\*MSD2 SPC, time=10.829:10.956 of C:\CHEM321\DATA\2016\_11\DAIY\_SEQUENCE\_LC 2016-11-28 09-43-52\2016\_11000003.D ES-

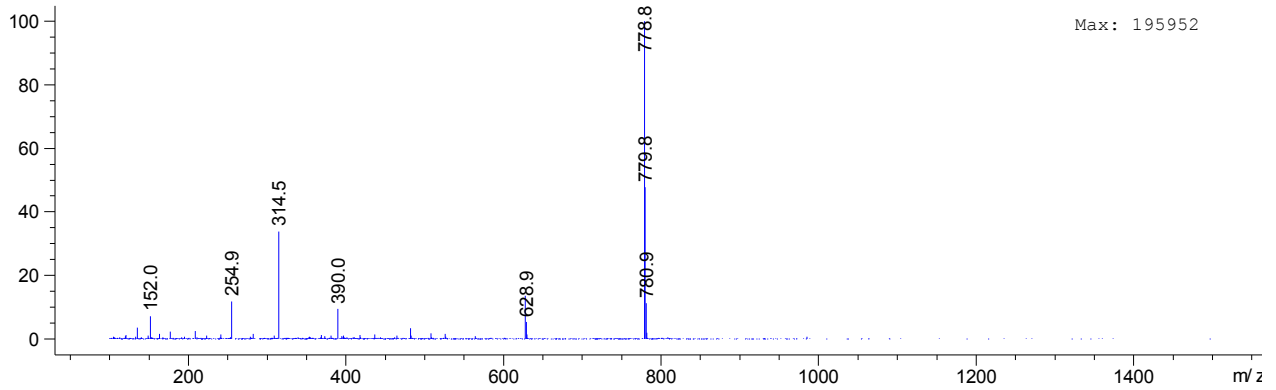

Origin Bruker BioSpin GmbH  
Solvent MeOD  
Temperature 300.0  
Pulse Sequence zg30  
Experiment 1D  
Number of Scans 16  
Acquisition Date 2016-11-28T12:25:00  
Modification Date 2016-11-28T12:25:02  
Spectrometer Frequency 400.13  
Spectral Width 8012.8  
Lowest Frequency -1543.0  
Nucleus 1H  
Acquired Size 32768  
Spectral Size 65536

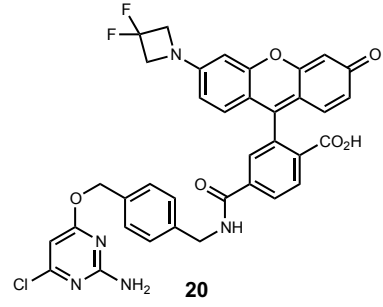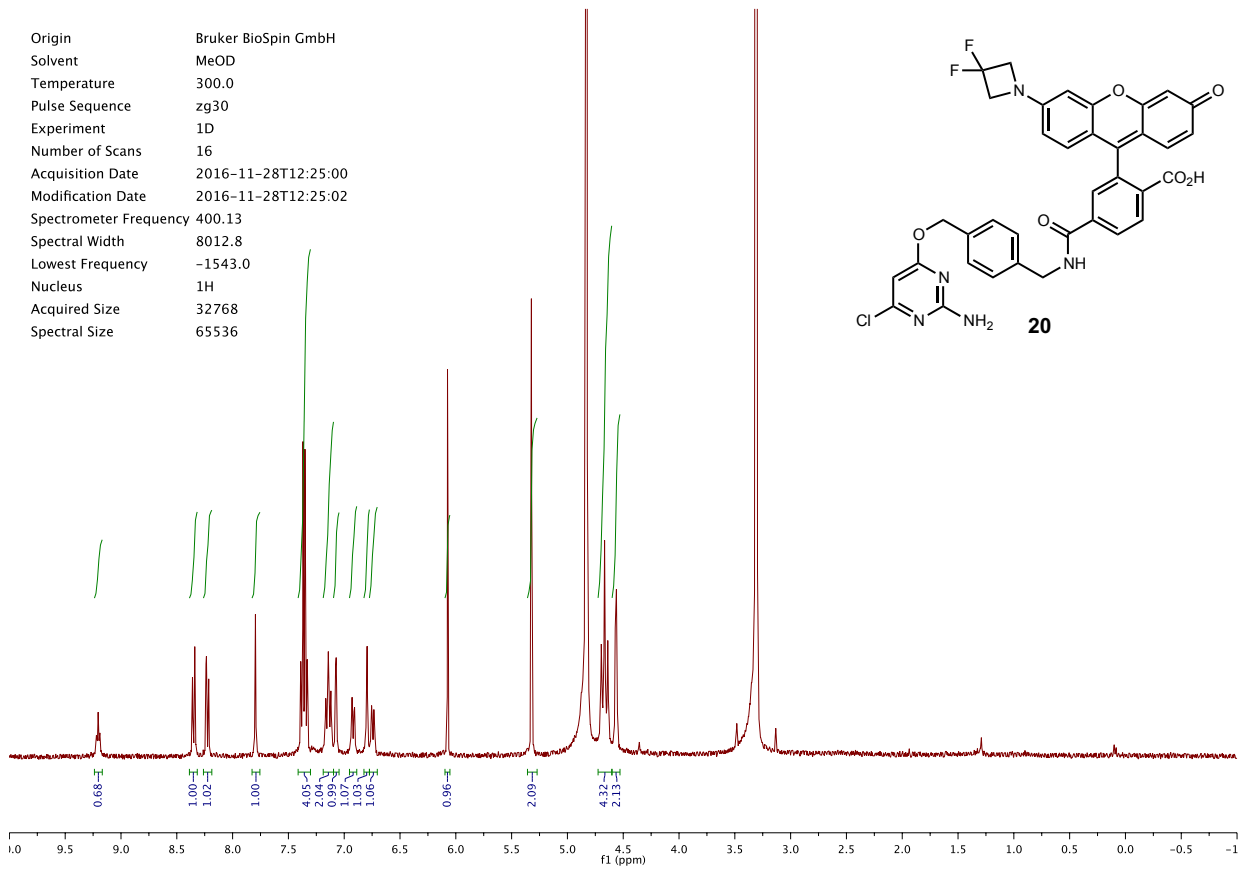

DAD1 B, Sig=500.4 Ref=off (2016\_11\DAIY\_SEQUENCE\_LC 2016-11-28 09-43-52\2016\_11000004.D)

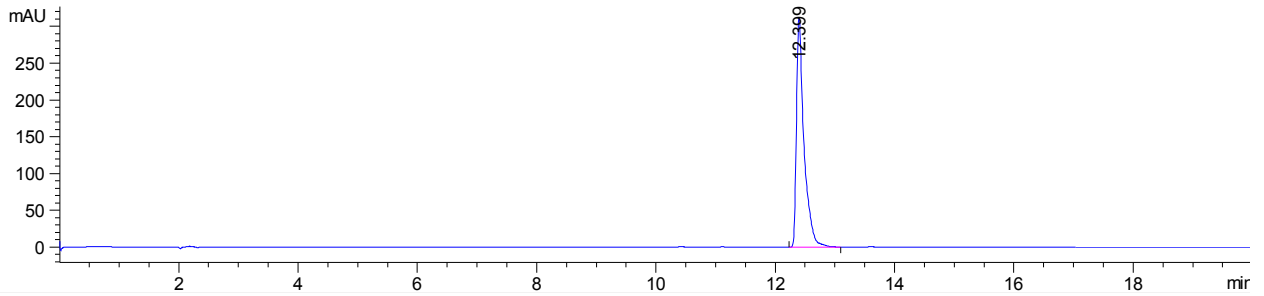

\*MSD2 SPC, time=12.406:12.588 of C:\CHEM32\1\DATA\2016\_11\DAIY\_SEQUENCE\_LC 2016-11-28 09-43-52\2016\_11000004.D ES-

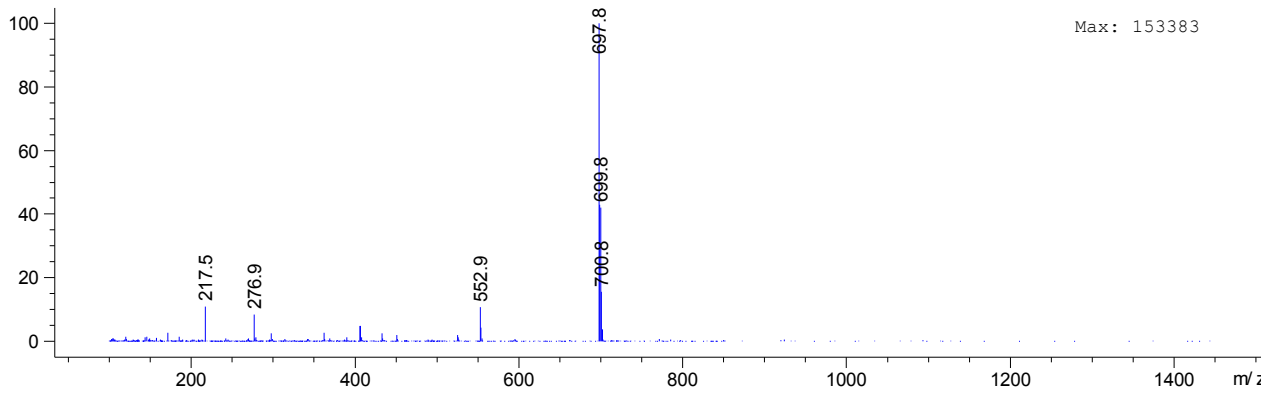

Origin Bruker BioSpin GmbH  
 Solvent MeOD  
 Temperature 300.0  
 Pulse Sequence zg30  
 Experiment 1D  
 Number of Scans 16  
 Acquisition Date 2015-05-26T09:06:00  
 Modification Date 2015-05-26T09:06:27  
 Spectrometer Frequency 400.13  
 Spectral Width 8223.7  
 Lowest Frequency -1644.1  
 Nucleus 1H  
 Acquired Size 32768  
 Spectral Size 65536

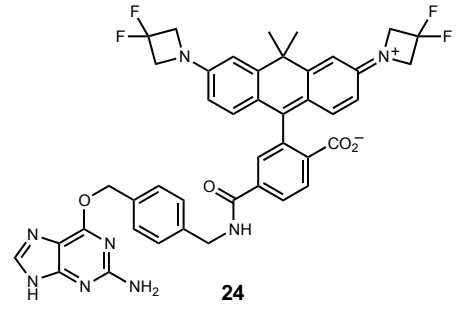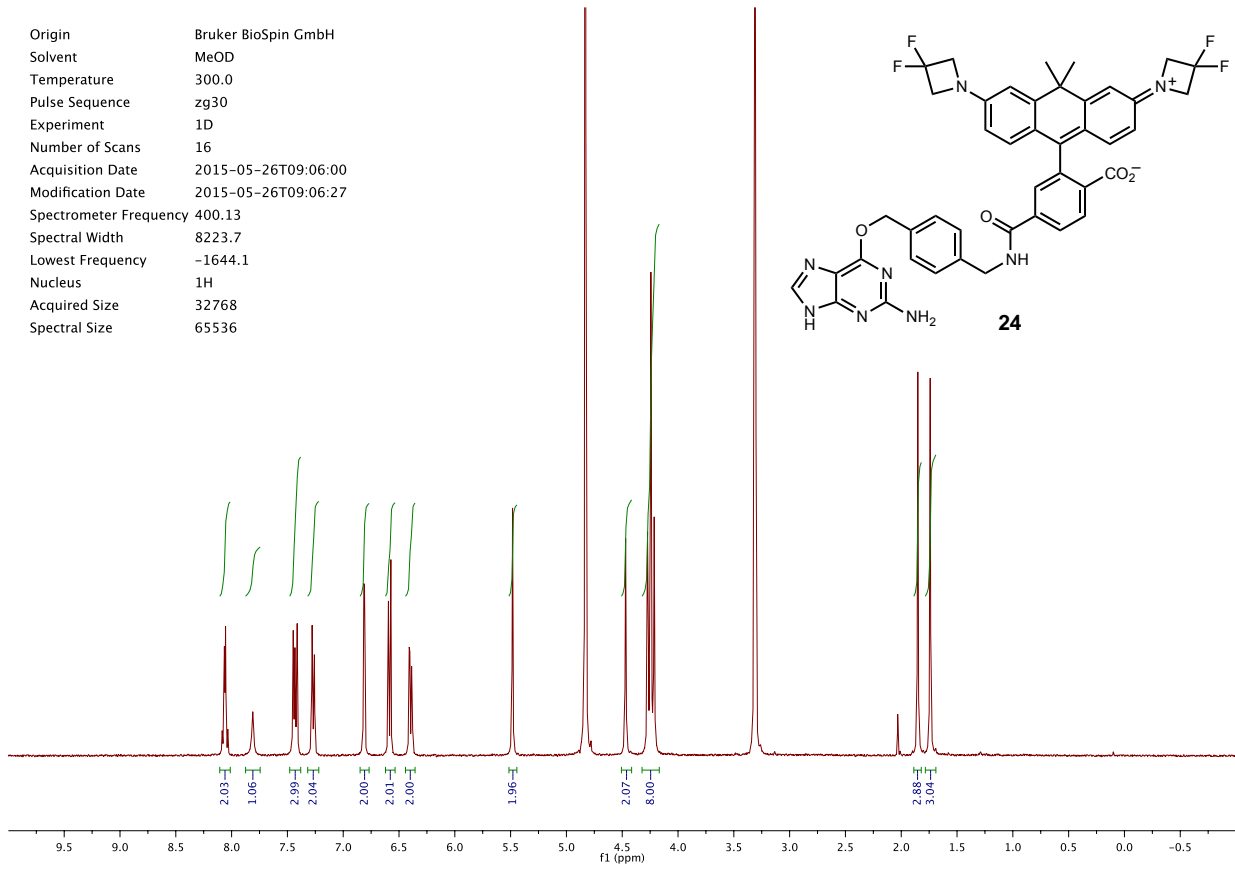

DAD1 D, Sig=600.4 Ref=off (2016\_01\DAIY\_SEQUENCE\_LC 2016-01-11 15-33-37\2016\_01000005.D)

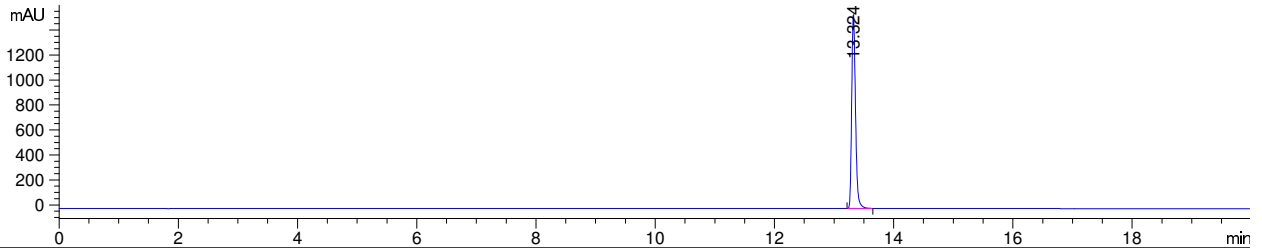

\*MSD2 SPC, time=13.314:13.424 of C:\CHEM32\1\DATA\2016\_01\DAIY\_SEQUENCE\_LC 2016-01-11 15-33-37\2016\_01000005.D ES-

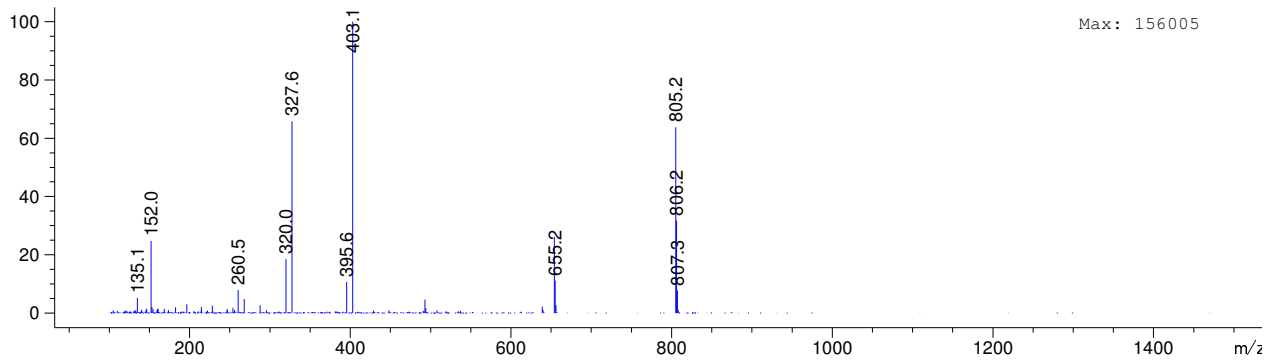

Supplement: NIHMS897198-supplement-3.pdf [file NIHMS897198-supplement-3.pdf]
